# Supplementary material
Source: PubMed Central journal article supplement (PMC8202730)
Supplement: NIHMS1678411-supplement-Supplementary_Information.pdf [file NIHMS1678411-supplement-Supplementary_Information.pdf]

**Balancing selection maintains hyper-divergent haplotypes  
in *C. elegans***

**Supplementary Information**

Daehan Lee<sup>#</sup>, Stefan Zdraljevic<sup>#</sup>, Lewis Stevens<sup>#</sup>, Ye Wang,  
Robyn E. Tanny, Timothy A. Crombie, Daniel E. Cook,  
Amy K. Webster, Rojin Chirakar, L. Ryan Baugh,  
Mark G. Sterken, Christian Braendle, Marie-Anne Félix,  
Matthew V. Rockman, Erik C. Andersen<sup>\*</sup>

<sup>#</sup> These authors contributed equally to this work.

<sup>\*</sup> Correspondence should be addressed to E.C.A (erik.andersen@northwestern.edu).

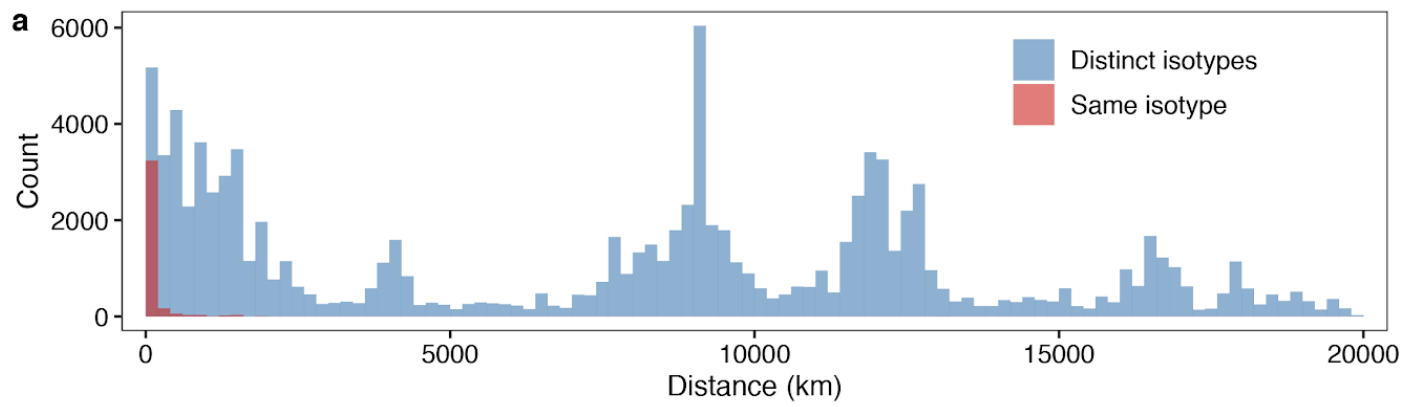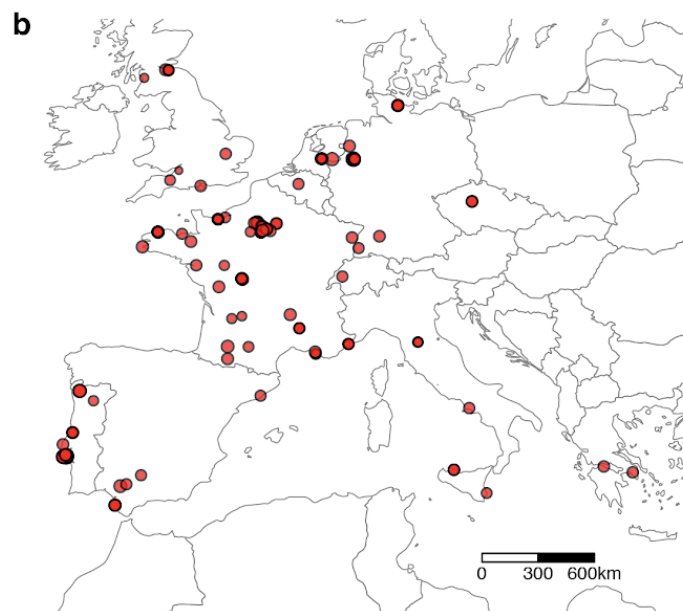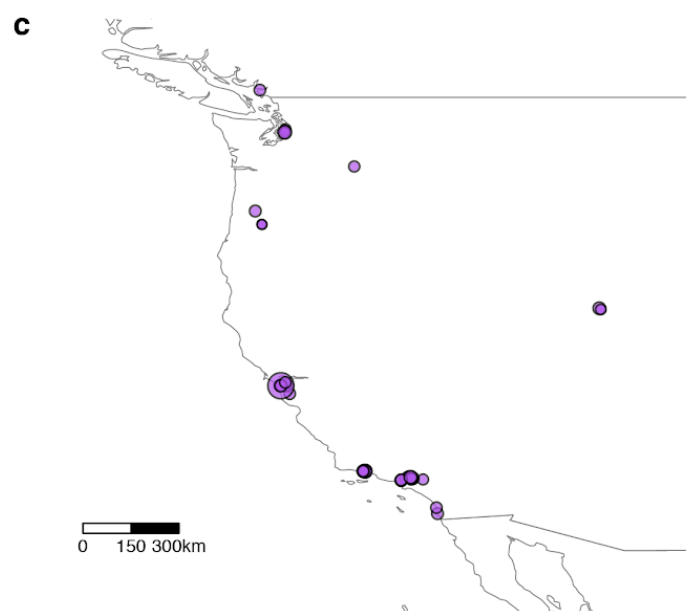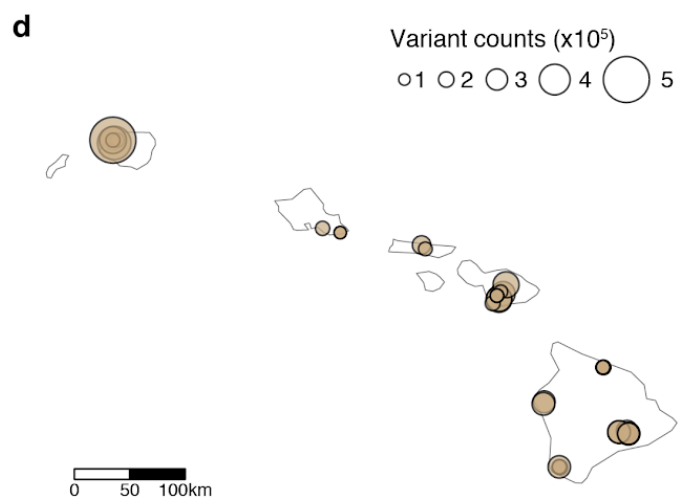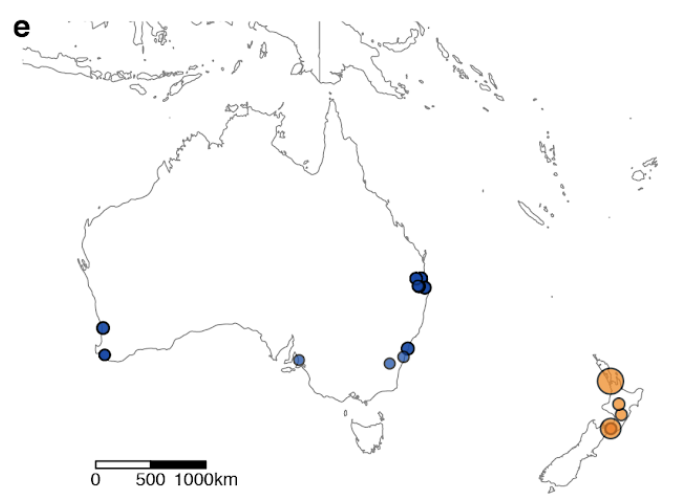

**Supplementary Fig. 1 | Geographic distribution of *C. elegans* isotypes**

(a) A histogram for the pairwise distances between locations of wild strain isolations with the same isotype (red) or distinct isotypes (blue). Distances between two isolations are shown on the x-axis, and counts for the wild strain pair are shown on the y-axis.

(b-e) The geographic distributions of isotypes from (b) Europe, (c) Pacific coast of North America, (d) Hawaii Islands, and (e) Australia and New Zealand are shown. Each circle corresponds to one of the wild isotypes, and the size of each circle corresponds to the number of non-reference homozygous alleles.

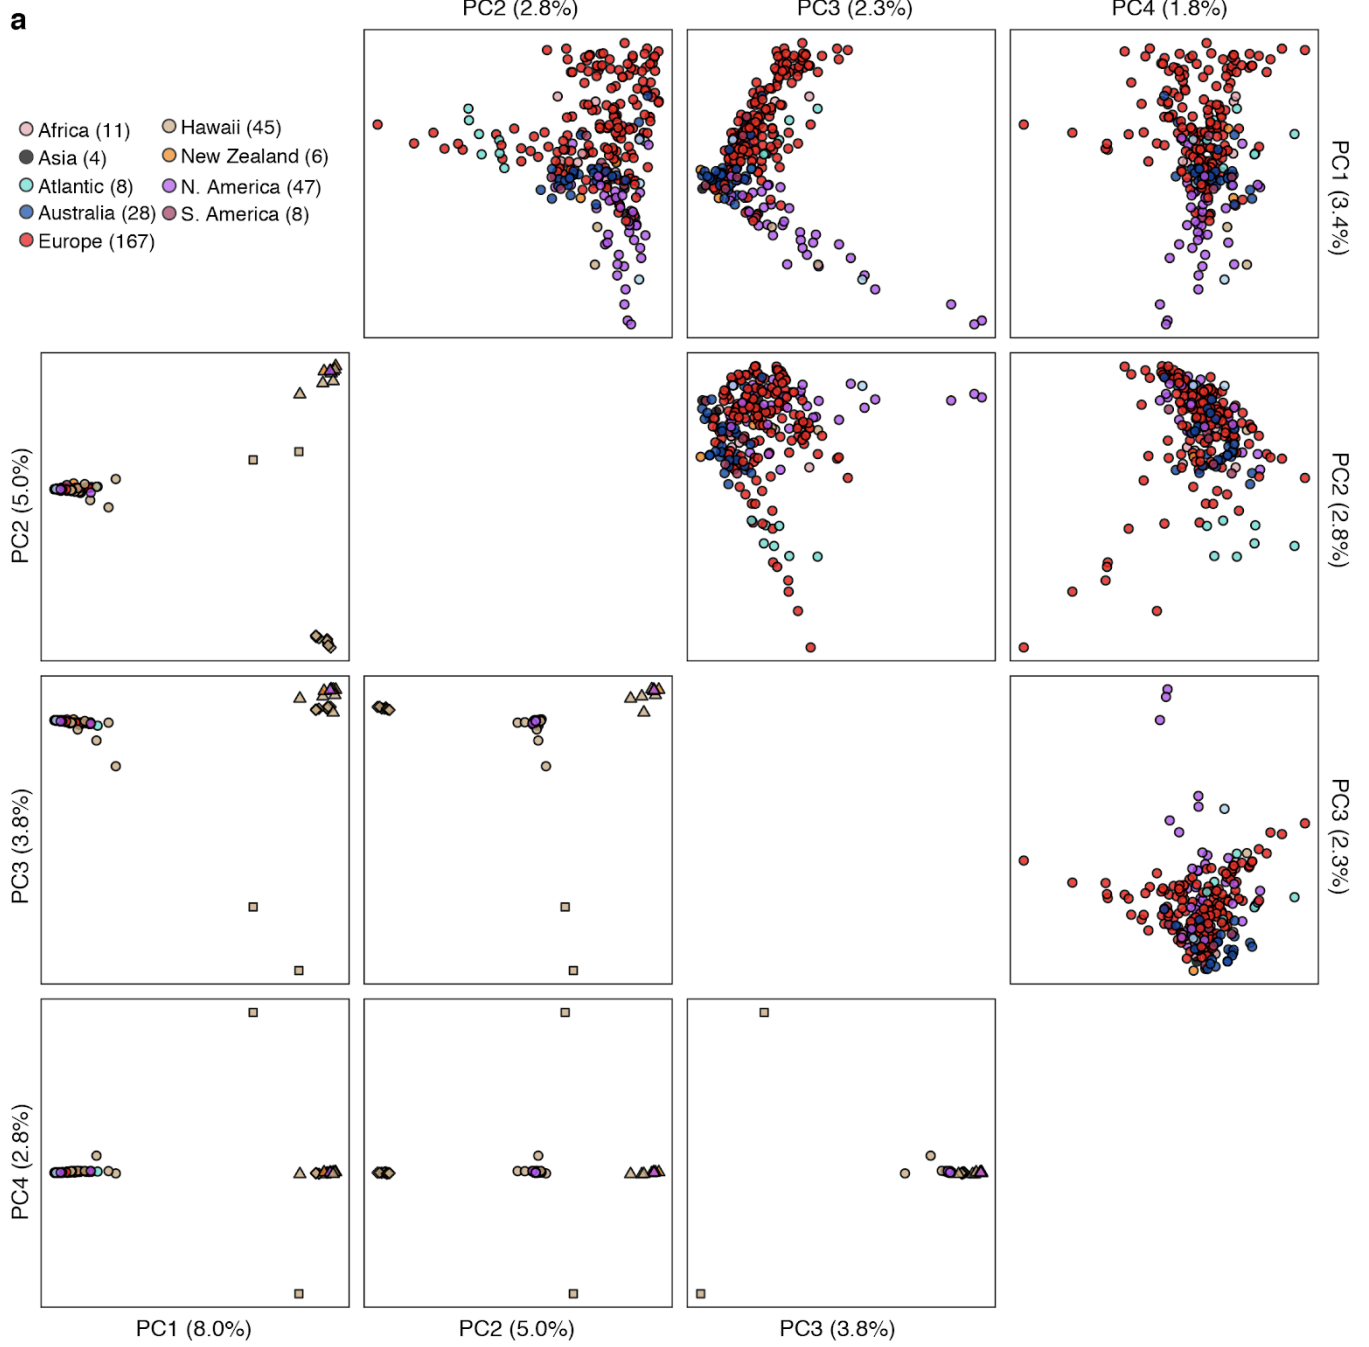

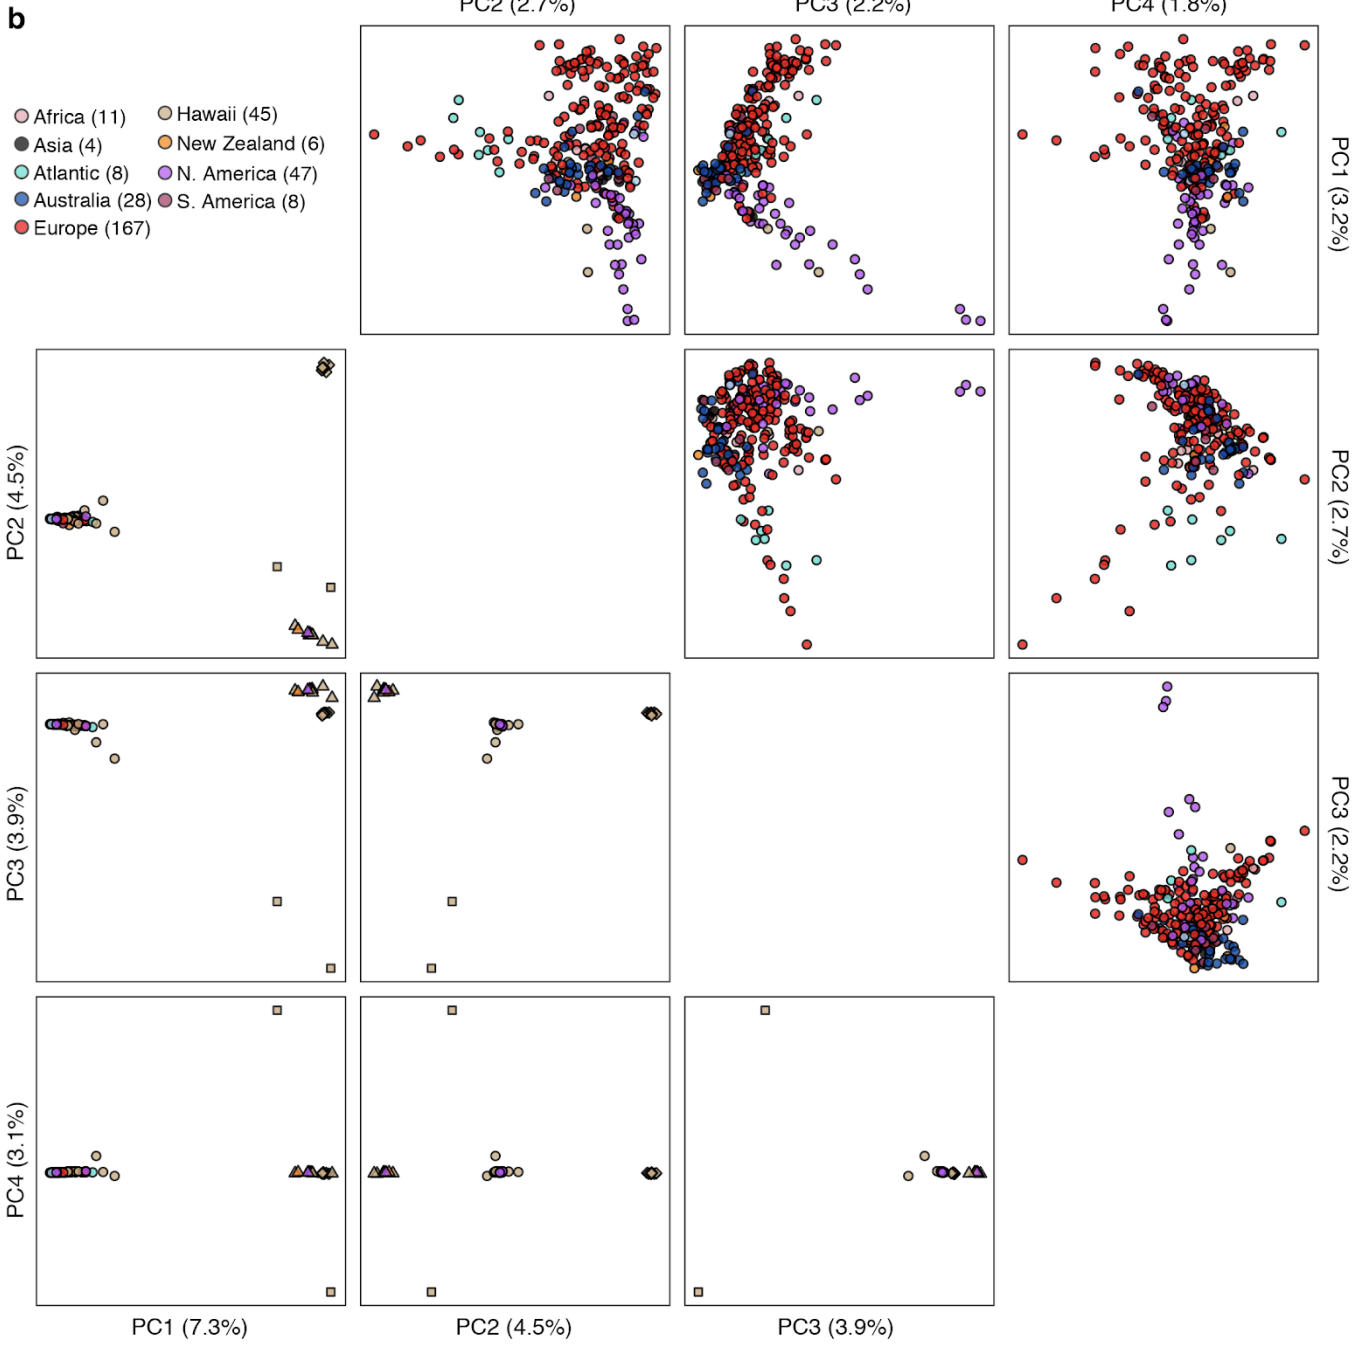

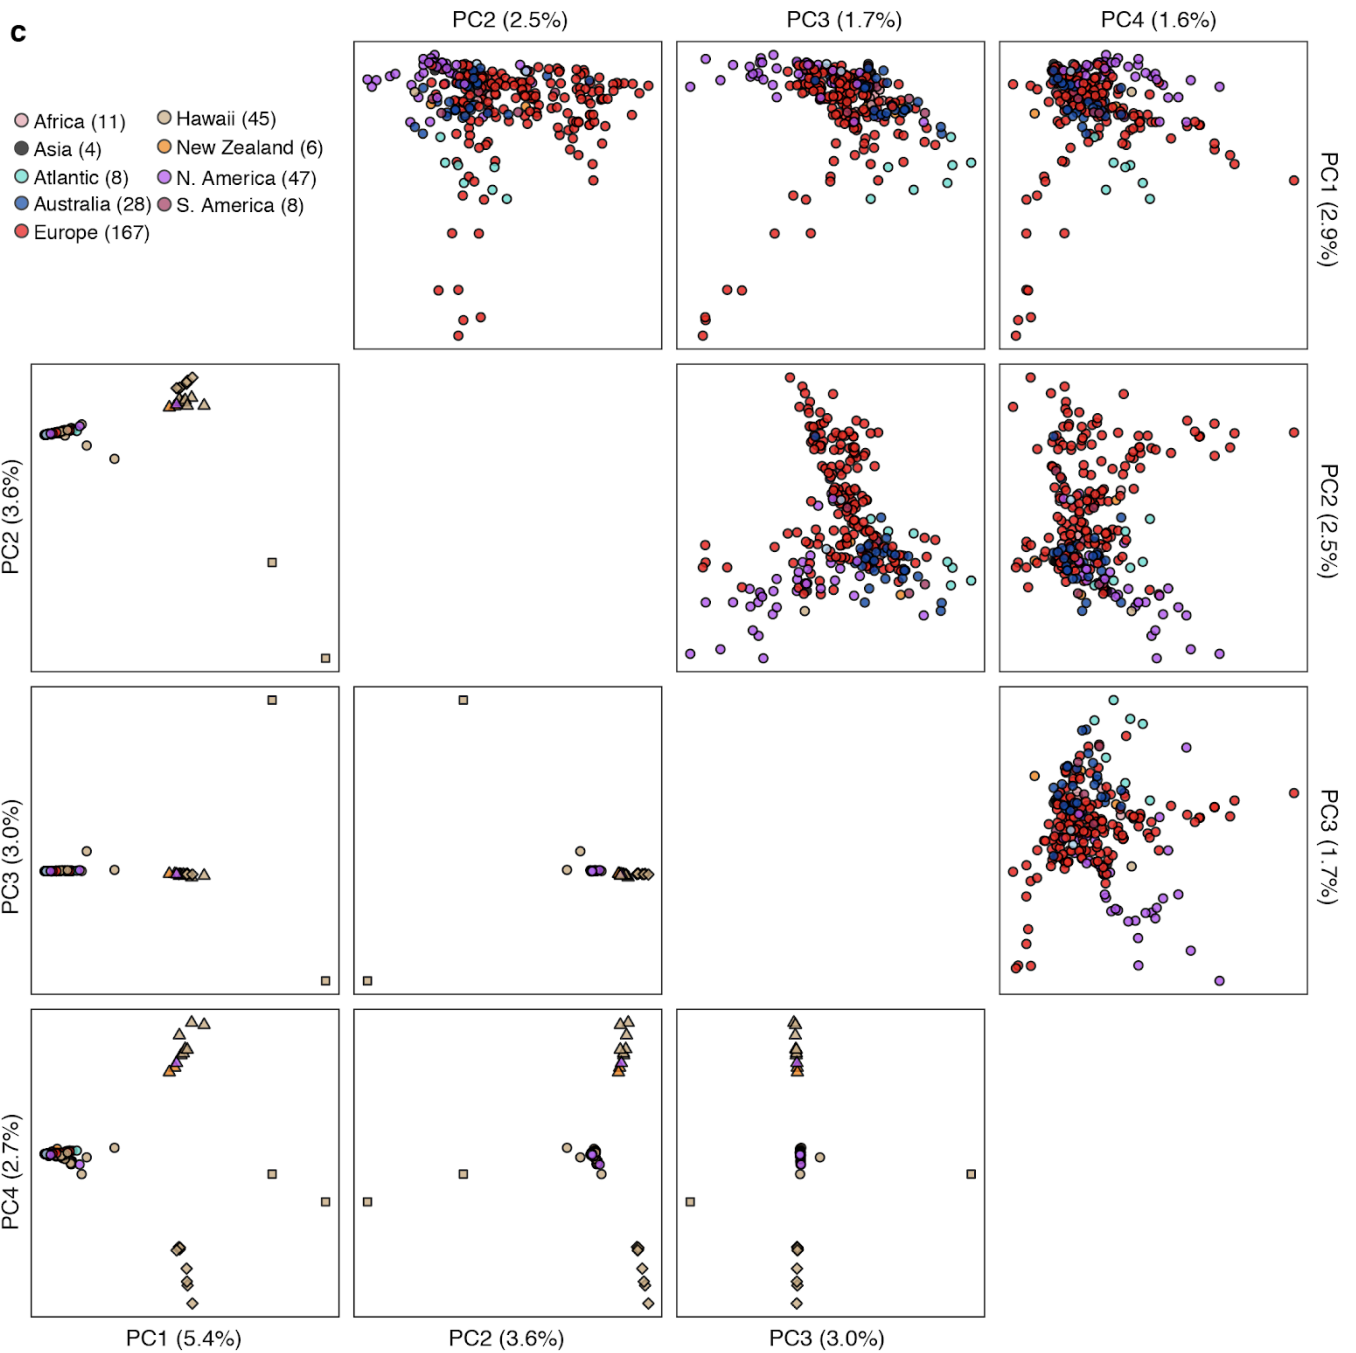

**Supplementary Fig. 2 | The population structure of 328 wild *C. elegans* isotypes**

Plots of the 324 isotypes from Global (circle), Pacific (triangle), and Hawaii (diamond) and two divergent isotypes (XZ1516 and ECA701, square) according to their values for each of the four significant axes of variation, as determined by principal component analysis (PCA) of the genotype covariances from LD-pruned genotype matrices (LD threshold: 0.8 (a), 0.6 (b), 0.2 (c)). (Lower triangle (bottom left plots): without outlier removal, upper triangle (top right plots): with outlier removal. See Methods.) Each point is one of the 328 isotypes, which is colored by the geographic origin of the isotype.

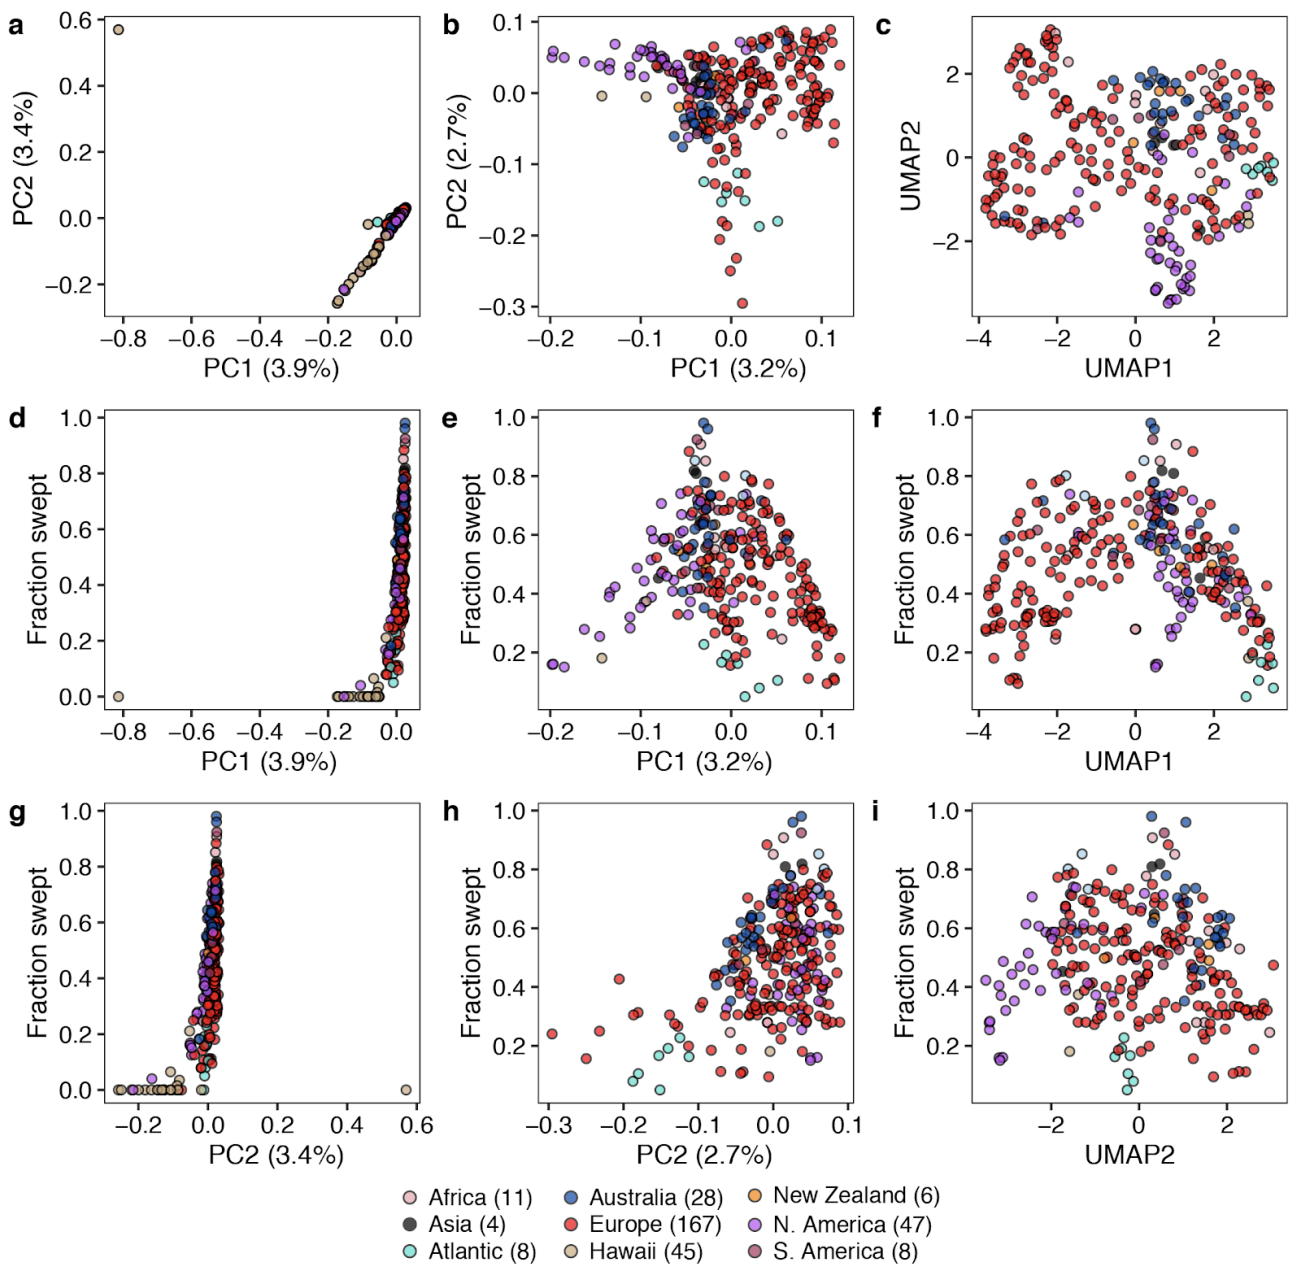

**Supplementary Fig. 3 | Selective sweeps shape population structure of the Global group**

(a) Plot of 308 isotypes that belong to the Global group according to their values for each of the two significant axes of variation, as determined by PCA of the genotype covariances. Each point is one of the 308 isotypes, which is colored by their geographic origins.

(b) Plot of 251 isotypes from the Global group according to the values for each of the two significant axes of variation, as determined by PCA of the genotype covariances with five iterations of outlier removal. Each point is one of the 251 isotypes, which is colored by the geographic origin.

(c) Plot of 251 isotypes from the Global group according to the values for each of the two significant axes of variation, as determined by Uniform Manifold Approximation and Projection (UMAP) analysis using five principal components from PCA of the genotype covariances with five iterations of outlier removal. Each point is one of the 251 isotypes, which is colored by the geographic origin.

(d-i) Scatter plots for the fraction of swept chromosomes for the isotypes in (a-c), respectively. The first (d-f) or second significant axis (g-i) of variation defined in (a-c) is shown on the x-axis, and the fraction of swept chromosomes is shown on the y-axis. Each point corresponds to one of 308 (d, g) or 251 (e-f, h-i) isotypes and is colored by the geographic origin.

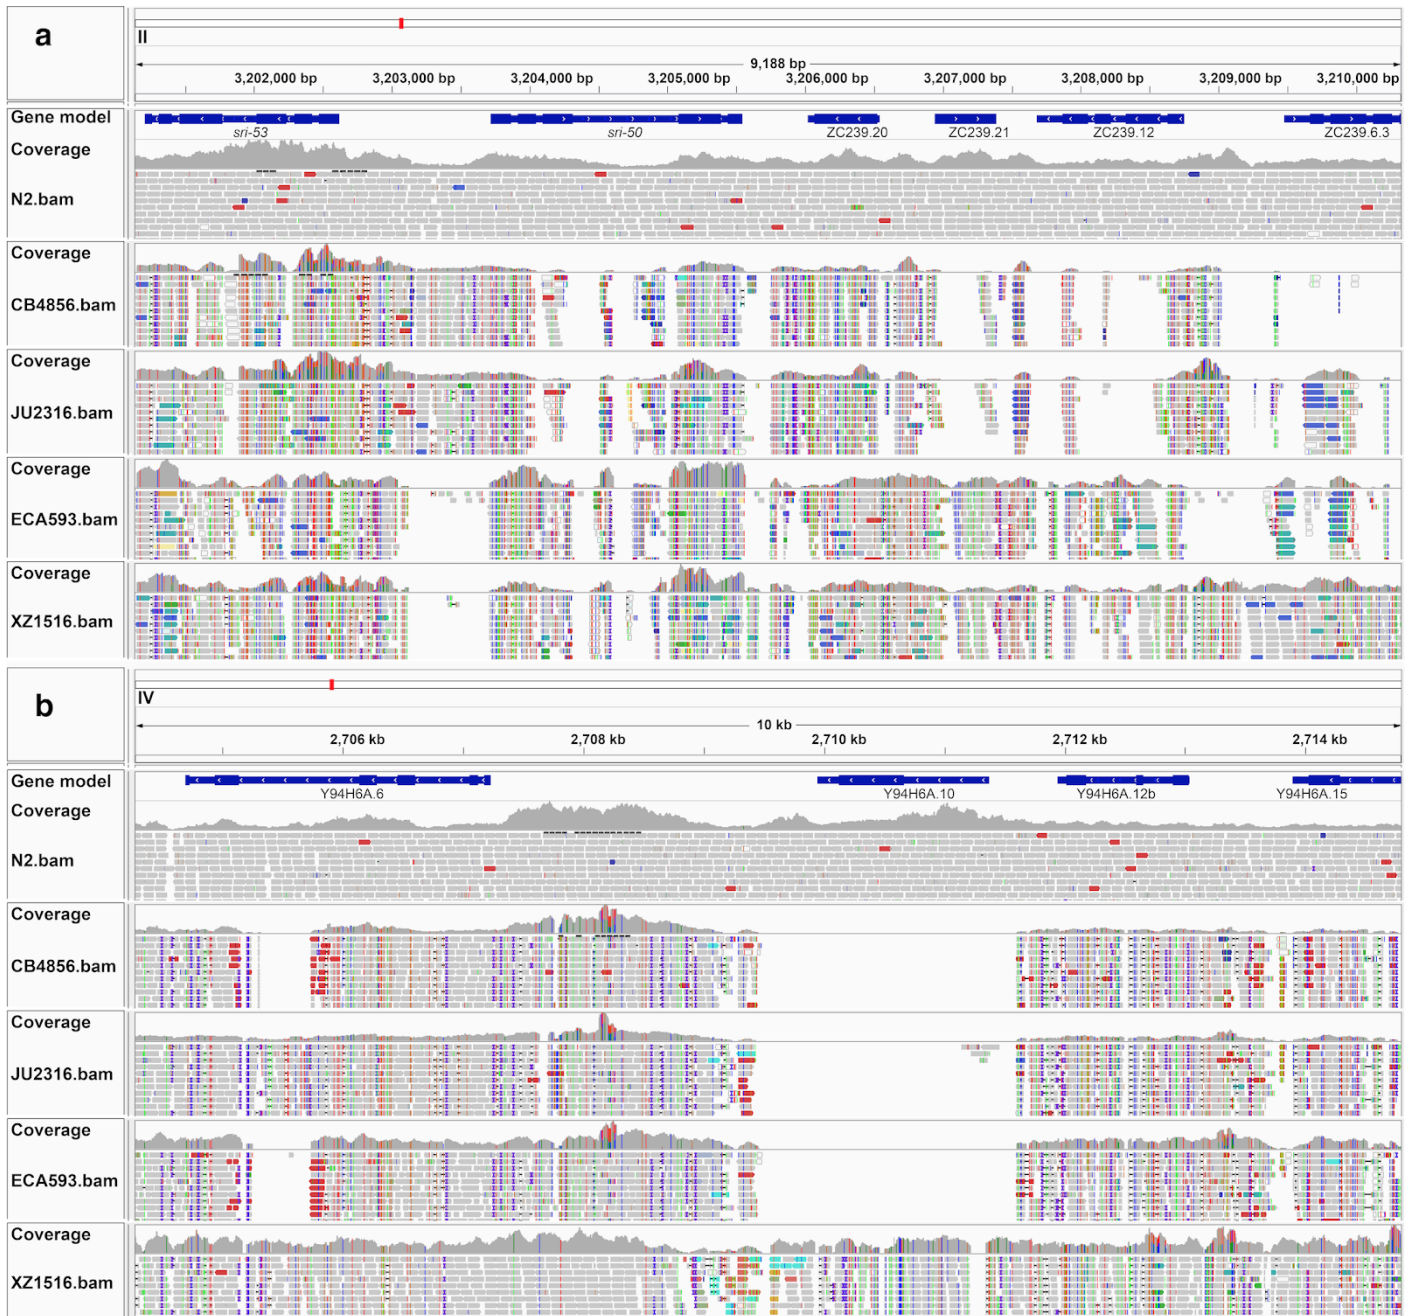

### Supplementary Fig. 4 | Short-read alignments of wild isotypes in hyper-divergent regions

Short-read alignments from five isotypes (N2, CB4856, JU2316, ECA593, and XZ1516) to the N2 reference genome (WS245) for (a) a region of chromosome II (II:3,200,000-3,211,000) and (b) a region of chromosome IV (IV:2,704,000-2,715,000) plotted by IGV 2.8.0 are shown. For each plot, genes in the interval are shown at the top. For each isotype, the top panel shows the coverage of genomic positions, and the bottom panel shows aligned short-reads at genomic positions (gray: normal reads, red: reads with putative deletion, blue: reads with putative insertion, navy and turquoise: reads with putative inversion, green: reads with putative duplication or translocation). Colored vertical lines indicate mismatched bases at the position.



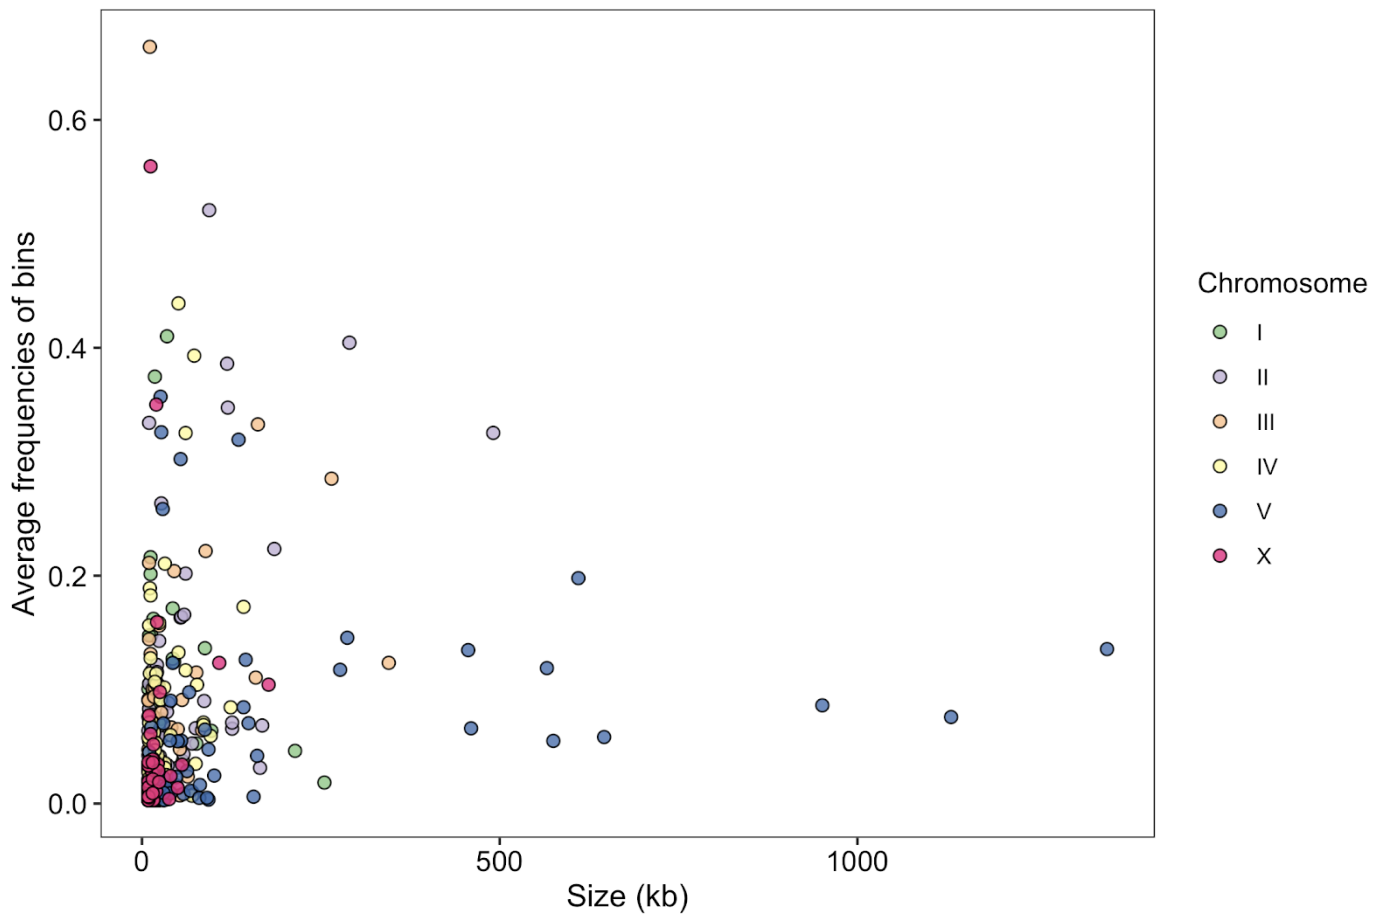

**Supplementary Fig. 5 | Sizes and frequencies of population-wide hyper-divergent blocks**

The population-wide hyper-divergent block sizes with respect to the N2 reference genome (x-axis) and the average frequencies of 1 kb bins that are classified as hyper-divergent across 327 non-reference isotypes (y-axis) is shown. Each point corresponds to one of the 366 population-wide hyper-divergent blocks.

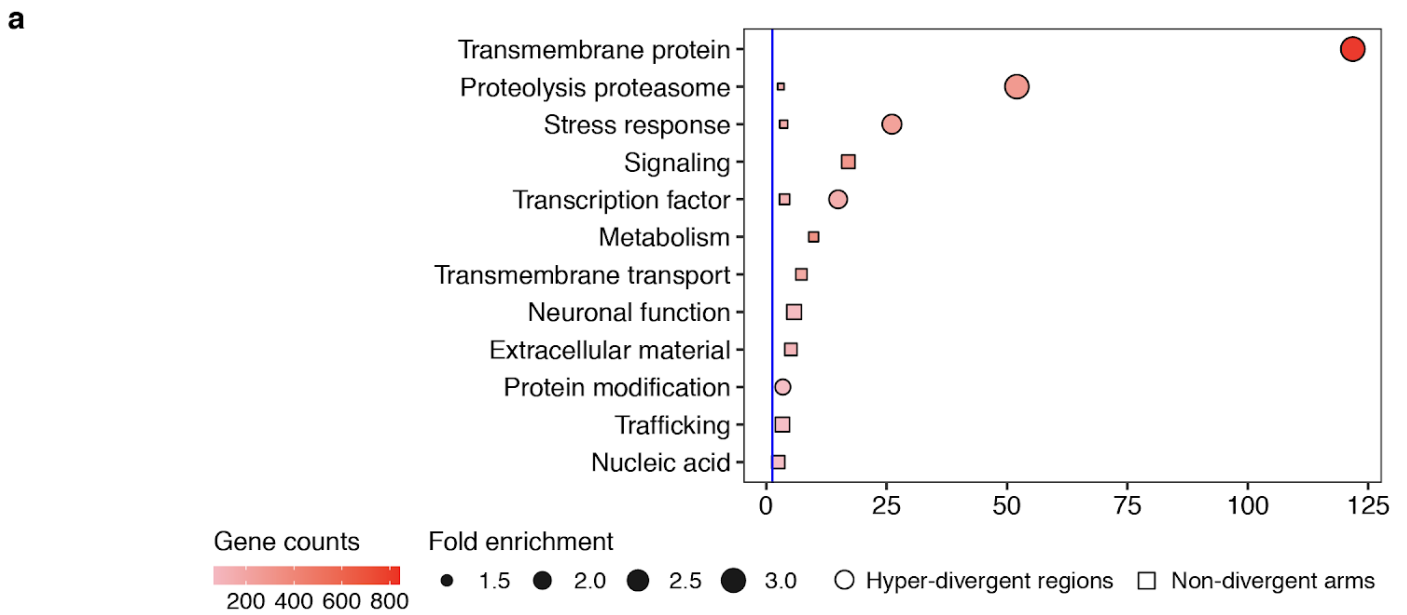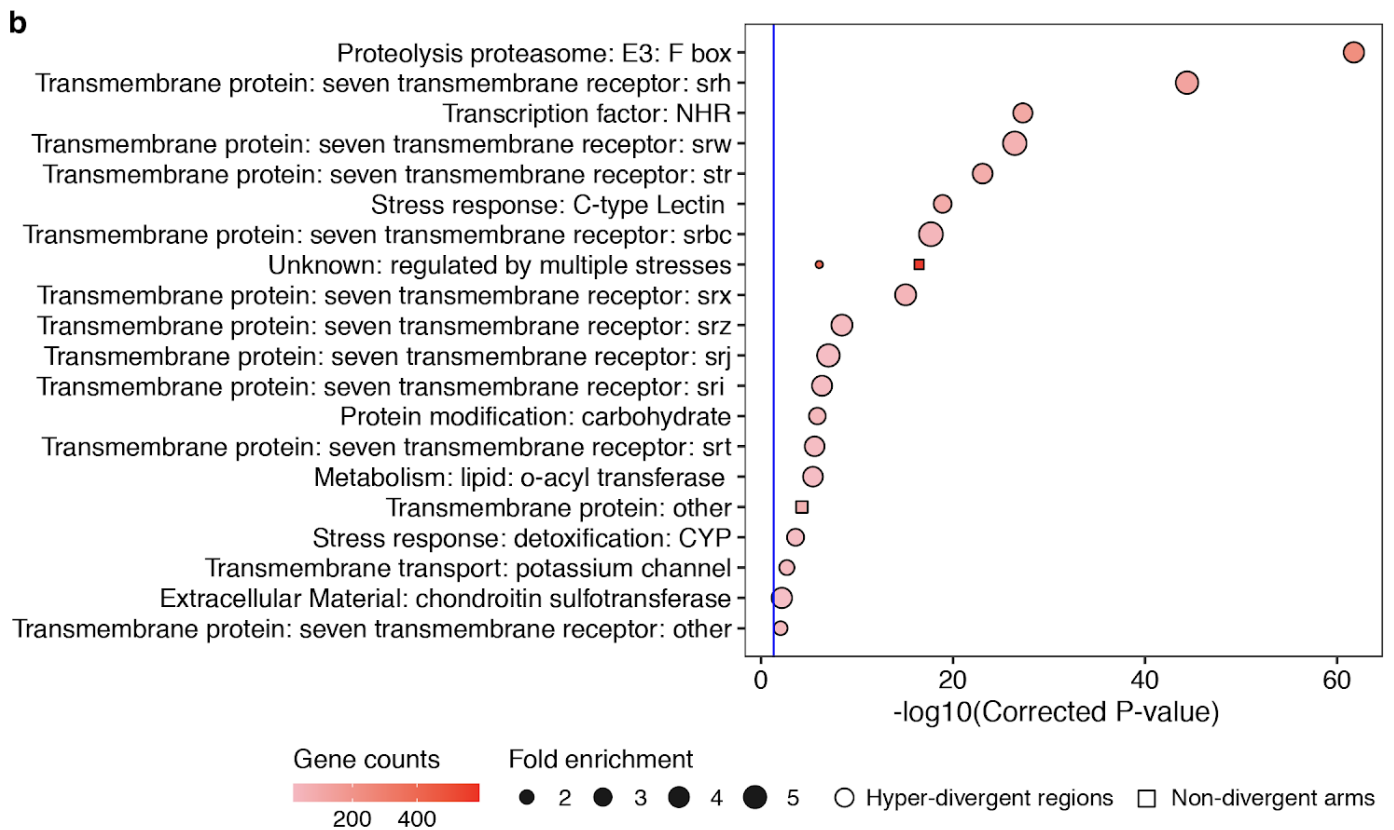

**Supplementary Fig. 6 | Gene-set enrichment (Wormcat) for hyper-divergent regions**

Gene-set enrichment for non-divergent chromosomal arms (square) and hyper-divergent regions (circle) are shown. Annotations in WormCat category 1 (a) and 3 (b) (see Methods) that are significantly enriched in non-divergent regions, hyper-divergent regions, or both are shown on the y-axis. Bonferroni-corrected significance values for gene-set enrichment analysis are shown on the x-axis. Sizes of squares and circles correspond to the fold enrichment of the annotation, and colors of square and circle correspond to the gene counts of the annotation. The blue line shows the Bonferroni-corrected significance threshold (corrected p-value = 0.05).

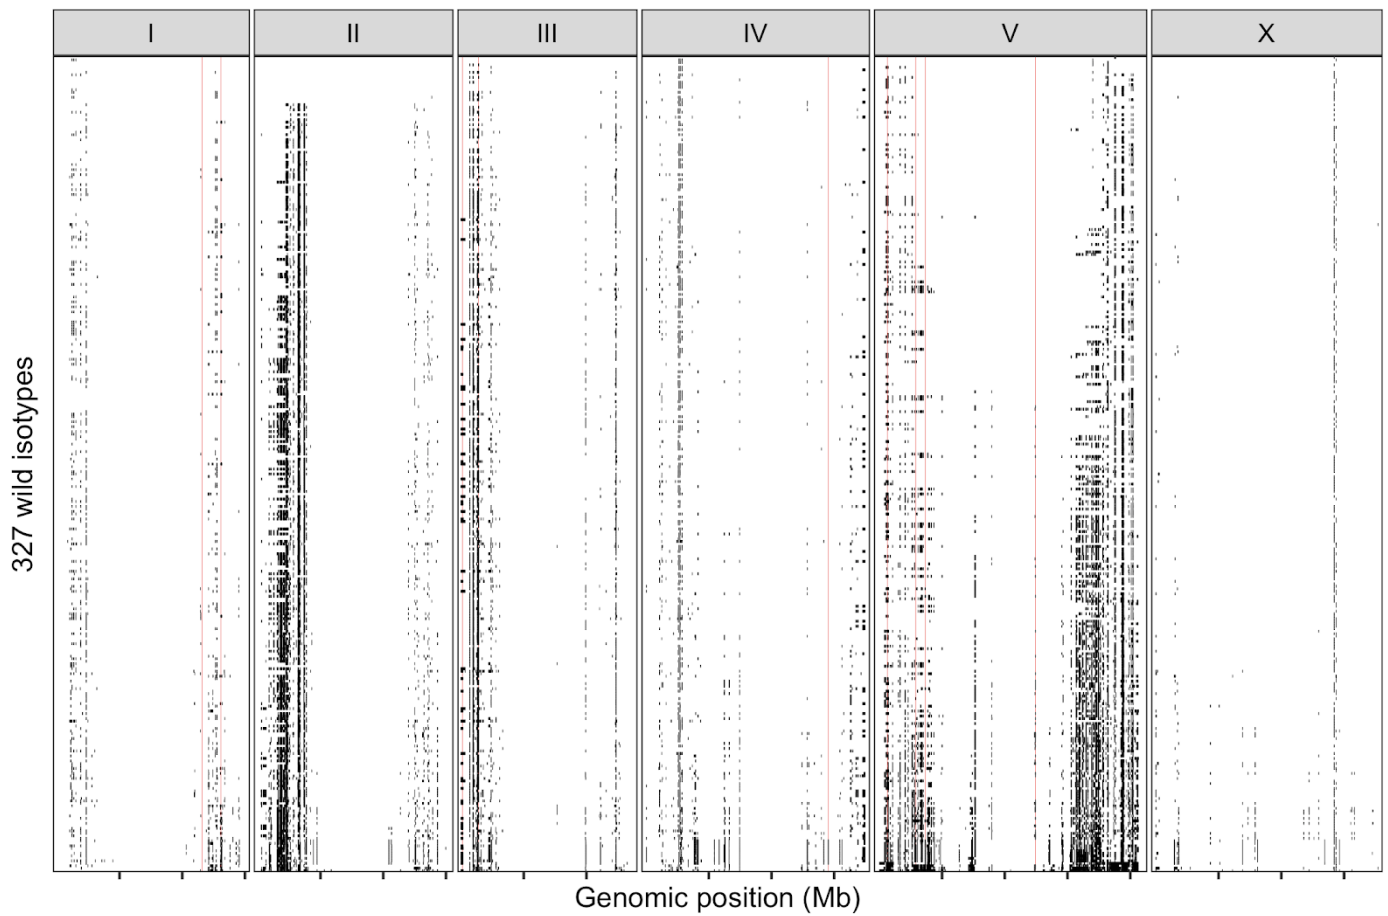

**Supplementary Fig. 7 | Co-localization of *pals* genes and hyper-divergent regions**

The genome-wide distribution of *pals* loci (red line) and hyper-divergent regions across 327 non-reference wild *C. elegans* isotypes is shown. Each row is one of the 327 isotypes, ordered by the total amount of genome covered by hyper-divergent regions (black). The genomic position in Mb is plotted on the x-axis, and each tick represents 5 Mb of the chromosome.

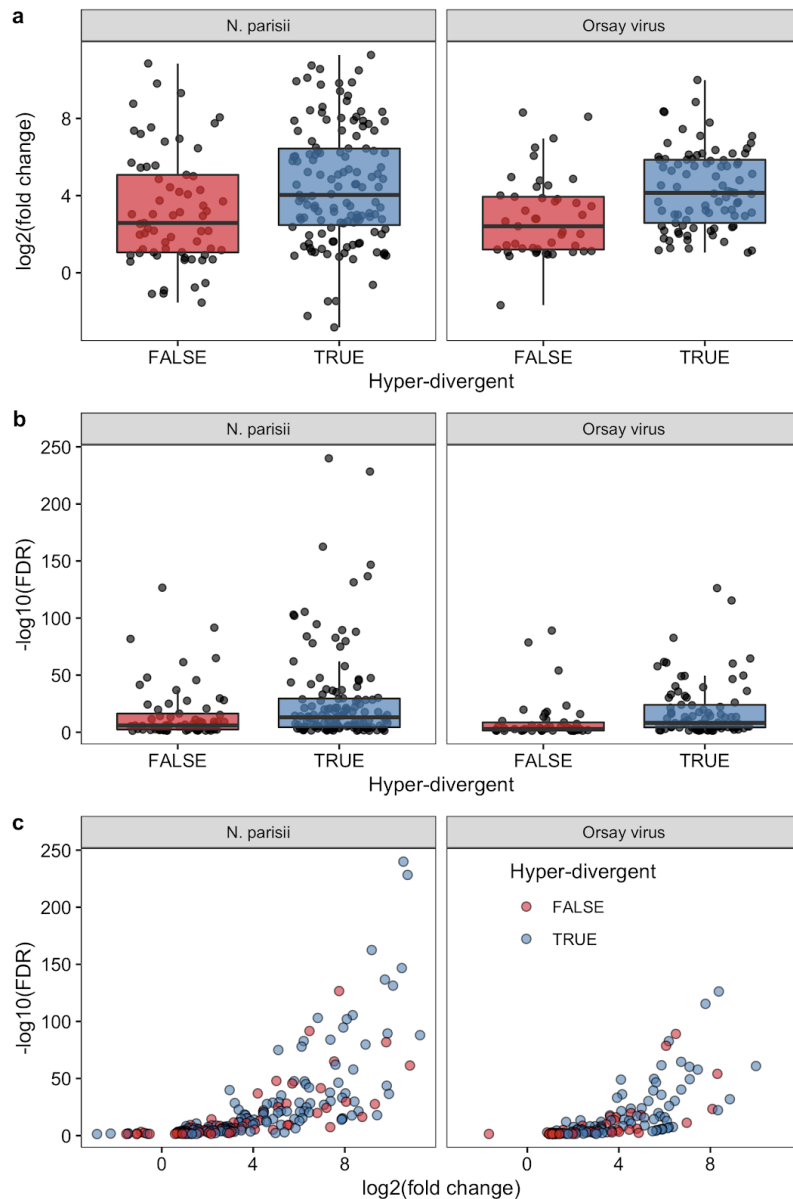

### Supplementary Fig. 8 | Induction of genes in hyper-divergent regions in responses to natural pathogens

(a) Tukey box plots of fold changes in gene expression level upon natural pathogen treatment are shown. Each point corresponds to a differentially expressed gene (DEG) upon treatment of *N. parisii* (left,  $n = 196$ ) and Orsay virus (right,  $n = 130$ ), which are grouped by their hyper-divergent status. Gene expression changes ( $\log_2(\text{fold change})$ ) in pathogen response are shown on the y-axis.

(b) Tukey box plots of significance in gene expression changes upon natural pathogen treatment are shown with data points plotted behind. Each point corresponds to DEGs upon treatment of *N. parisii* (left,  $n = 196$ ) and Orsay virus (right,  $n = 130$ ), which are grouped by their location. The significance of differences in pathogen response are shown on the y-axis. (a,b) The horizontal line in the middle of the box is the median, and the box denotes the 25th to 75th quantiles of the data. The vertical line represents the 1.5x interquartile range.

(c) A scatter plot for the gene expression changes and significance of DEGs in (a) and (b). Each point corresponds to differentially expressed genes (DEGs) upon treatment of *N. parisii* (left,  $n = 196$ ) and Orsay virus (right,  $n = 130$ ), which are colored by their location (blue: within hyper-divergent regions, red: within the rest of the genome). Gene expression changes in pathogen response are shown on the x-axis, and significance of differences are shown on the y-axis.

### Supplementary Table 1 | Sampling information for 609 wild strains

The sampling location and dates for all 611 *C. elegans* strains. The 328 reference isotypes are listed in the second column named "Isotype". The GPS coordinates are in the third and fourth columns, the person who sampled the strain is listed in the fifth column, and the isolation date is in the sixth column.

| Strain   | Isotype  | Latitude    | Longitude  | Sampled by            | isolation date |
|----------|----------|-------------|------------|-----------------------|----------------|
| AB1      | AB1      | -34.93      | 138.59     | D. Riddle and A. Bird | 1983           |
| AB4      | CB4858   | -34.93      | 138.59     | D. Riddle and A. Bird | 1983           |
| BRC20067 | BRC20067 | 24.072954   | 121.169736 | J. Wang               | 2012-01-13     |
| BRC20113 | BRC20067 | 24.124167   | 121.283056 | C. Lee and N. Chang   | 2014-05-09     |
| BRC20231 | MY23     | 23.541517   | 120.908112 | T. Volans             | 2014-06-15     |
| BRC20263 | BRC20263 | -33.8674861 | 151.206989 | C. Lee and N. Chang   | 2014-08-04     |
| CB4852   | CB4852   | NA          | NA         | Unknown               | pre-1966       |
| CB4854   | CB4854   | 34.189      | -118.131   | C. Johnson            | 1973-12-01     |
| CB4856   | CB4856   | 21.33       | -157.86    | L. Hollen             | 1972-08-01     |
| CB4932   | CB4932   | 51.02       | -3.1       | P. Grewal             | pre-1991       |
| CX11254  | CX11254  | 34.130138   | -118.11484 | A. Sivasundar         | 2003-09-01     |
| CX11262  | CX11262  | 34.130138   | -118.11484 | A. Sivasundar         | 2003-09-01     |
| CX11264  | CX11264  | 34.130138   | -118.11484 | A. Sivasundar         | 2003-09-01     |
| CX11271  | CX11271  | 34.13712    | -118.12532 | A. Sivasundar         | 2003-09-01     |
| CX11276  | CX11276  | 34.20111    | -118.21198 | A. Sivasundar         | 2003-09-01     |
| CX11285  | CX11285  | 34.14331    | -118.05496 | A. Sivasundar         | 2003-09-01     |
| CX11292  | CX11292  | 34.13531    | -118.30582 | A. Sivasundar         | 2004-02-01     |
| CX11307  | CX11307  | 34.12946    | -118.10987 | A. Sivasundar         | 2013-09-03     |
| CX11314  | CX11314  | 34.12946    | -118.10987 | A. Sivasundar         | 2003-09-01     |
| CX11315  | CX11315  | 34.12946    | -118.10987 | A. Sivasundar         | 2013-09-03     |
| DL200    | DL200    | 9.03        | 38.74      | D. Denver             | 2007-12-01     |
| DL226    | DL226    | 44.5633     | -123.2821  | C. Hilburn            | 2008           |
| DL238    | DL238    | 19.11       | -155.81    | J. Knapp              | 2008-07-15     |
| ECA189   | ECA189   | 19.423889   | -155.2225  | T. Blanche            | 2014-07-09     |
| ECA190   | ECA189   | 19.423889   | -155.2225  | T. Blanche            | 2014-07-09     |
| ECA191   | ECA191   | 19.424167   | -155.22194 | T. Blanche            | 2014-07-09     |
| ECA192   | ECA189   | 19.424444   | -155.22194 | T. Blanche            | 2014-07-09     |
| ECA193   | ECA189   | 19.424444   | -155.22194 | T. Blanche            | 2014-07-09     |
| ECA243   | CB4851   | 44.85       | 0.48       | V. Nigon              | pre-1949       |
| ECA245   | CB4853   | 34.171      | -118.131   | C. Johnson            | 1974-05-01     |
| ECA246   | CB4853   | 34.189      | -118.131   | C. Johnson            | 1974-05-01     |
| ECA248   | CB4855   | 37.44       | -122.14    | T. Doniach            | 1982           |
| ECA249   | CB4857   | 34.096      | -117.719   | E. Hedgecock          | 1972-11-01     |

|        |        |            |            |                             |            |
|--------|--------|------------|------------|-----------------------------|------------|
| ECA250 | CB4857 | 34.096     | -117.719   | E. Hedgecock                | 1972-11-01 |
| ECA251 | CB4858 | 34.1       | -118.1     | E. Hedgecock                | 1973-06-01 |
| ECA259 | PB306  | NA         | NA         | S. Baird                    | 1998-11-28 |
| ECA347 | ECA347 | 19.438889  | -155.30361 | C. Andersen and M. Andersen | 2016-02-07 |
| ECA348 | ECA348 | 37.775334  | -122.25389 | S. Zdraljevic               | 2015-12-30 |
| ECA349 | ECA349 | 32.765758  | -117.23674 | E. Andersen                 | 2016-02-09 |
| ECA350 | ECA349 | 32.765353  | -117.23544 | E. Andersen                 | 2016-02-09 |
| ECA36  | ECA36  | -36.893333 | 174.745529 | I. Ly                       | 2013-07-27 |
| ECA363 | ECA363 | 20.723611  | -156.30444 | C. Andersen and M. Andersen | 2016-02-19 |
| ECA369 | ECA369 | 21.175556  | -157.00639 | C. Andersen and M. Andersen | 2016-02-20 |
| ECA372 | ECA372 | 22.121667  | -159.66444 | C. Andersen and M. Andersen | 2016-02-27 |
| ECA393 | ECA189 | 19.449831  | -155.23549 | G. Chavez                   | 2016-05-17 |
| ECA394 | ECA189 | 19.449831  | -155.23549 | G. Chavez                   | 2016-05-17 |
| ECA395 | ECA189 | 19.449831  | -155.23549 | G. Chavez                   | 2016-05-17 |
| ECA396 | ECA396 | 19.449831  | -155.23549 | G. Chavez                   | 2016-05-17 |
| ECA397 | ECA396 | 19.449831  | -155.23549 | G. Chavez                   | 2016-05-17 |
| ECA398 | ECA396 | 19.449831  | -155.23549 | G. Chavez                   | 2016-05-17 |
| ECA399 | ECA396 | 19.449831  | -155.23549 | G. Chavez                   | 2016-05-17 |
| ECA551 | JU311  | 44.42      | 4.4        | M.-A. Félix                 | 2002-09-08 |
| ECA552 | MY2573 | 43.8658    | 5.0628     | M.-A. Félix                 | 2013-11-17 |
| ECA571 | ED3073 | -1.05      | 36.39      | E. Dolgin                   | 2006-05-17 |
| ECA572 | ED3073 | -1.05      | 36.39      | E. Dolgin                   | 2006-05-17 |
| ECA589 | JU1395 | 47.2199    | 0.04619    | M.-A. Félix                 | 2008-03-01 |
| ECA592 | ECA592 | 34.417128  | -119.64092 | E. Andersen                 | 2017-03-07 |
| ECA593 | ECA593 | 34.418632  | -119.64216 | E. Andersen                 | 2017-03-07 |
| ECA594 | ECA594 | 34.417532  | -119.64067 | E. Andersen                 | 2017-03-07 |
| ECA615 | JU1581 | 48.7015    | 2.1725     | M.-A. Félix                 | 2008-09-08 |
| ECA616 | JU1530 | 48.7015    | 2.1725     | M.-A. Félix                 | 2008-09-09 |
| ECA640 | ECA640 | 34.065378  | -118.44116 | E. Andersen                 | 2017-06-22 |
| ECA701 | ECA701 | 22.123283  | -159.65643 | D. Cook                     | 2017-08-11 |
| ECA702 | ECA701 | 22.123283  | -159.65643 | D. Cook                     | 2017-08-11 |
| ECA703 | ECA703 | 20.038831  | -155.43892 | S. Zdraljevic               | 2017-08-13 |
| ECA704 | ECA812 | 20.039783  | -155.44152 | D. Lee                      | 2017-08-13 |
| ECA705 | ECA705 | 20.038831  | -155.43892 | S. Zdraljevic               | 2017-08-13 |
| ECA706 | ECA706 | 20.038831  | -155.43892 | S. Zdraljevic               | 2017-08-13 |
| ECA707 | ECA778 | 20.039783  | -155.44152 | D. Lee                      | 2017-08-13 |
| ECA708 | ECA778 | 20.039783  | -155.44152 | D. Lee                      | 2017-08-13 |

|        |        |             |            |               |            |
|--------|--------|-------------|------------|---------------|------------|
| ECA709 | ECA778 | 20.039783   | -155.44152 | D. Lee        | 2017-08-13 |
| ECA710 | ECA710 | 20.039656   | -155.4381  | D. Lee        | 2017-08-13 |
| ECA711 | ECA712 | 19.423864   | -155.22248 | S. Zdraljevic | 2017-08-14 |
| ECA712 | ECA712 | 19.423864   | -155.22248 | S. Zdraljevic | 2017-08-14 |
| ECA713 | ECA712 | 19.423864   | -155.22248 | S. Zdraljevic | 2017-08-14 |
| ECA714 | ECA712 | 19.423864   | -155.22248 | S. Zdraljevic | 2017-08-14 |
| ECA715 | ECA712 | 19.423864   | -155.22248 | S. Zdraljevic | 2017-08-14 |
| ECA716 | ECA807 | 20.039844   | -155.44141 | D. Lee        | 2017-08-13 |
| ECA717 | ECA807 | 20.039844   | -155.44141 | D. Lee        | 2017-08-13 |
| ECA718 | ECA807 | 20.039844   | -155.44141 | D. Lee        | 2017-08-13 |
| ECA719 | ECA812 | 20.039858   | -155.44142 | S. Zdraljevic | 2017-08-13 |
| ECA720 | ECA807 | 20.039858   | -155.44142 | S. Zdraljevic | 2017-08-13 |
| ECA721 | ECA778 | 20.039858   | -155.44142 | S. Zdraljevic | 2017-08-13 |
| ECA722 | ECA722 | 19.423975   | -155.22263 | S. Zdraljevic | 2017-08-14 |
| ECA723 | ECA723 | 19.424272   | -155.22166 | D. Lee        | 2017-08-14 |
| ECA724 | ECA724 | 19.439144   | -155.30383 | S. Zdraljevic | 2017-08-14 |
| ECA725 | ECA724 | 19.439144   | -155.30383 | S. Zdraljevic | 2017-08-14 |
| ECA726 | ECA724 | 19.439144   | -155.30383 | S. Zdraljevic | 2017-08-14 |
| ECA727 | ECA724 | 19.439144   | -155.30383 | S. Zdraljevic | 2017-08-14 |
| ECA728 | ECA723 | 19.424272   | -155.22166 | D. Lee        | 2017-08-14 |
| ECA729 | ECA723 | 19.424272   | -155.22166 | D. Lee        | 2017-08-14 |
| ECA730 | ECA730 | 19.423869   | -155.22248 | S. Zdraljevic | 2017-08-14 |
| ECA731 | ECA733 | 19.115886   | -155.81839 | S. Zdraljevic | 2017-08-15 |
| ECA732 | ECA732 | 19.115403   | -155.81845 | E. Andersen   | 2017-08-15 |
| ECA733 | ECA733 | 19.115886   | -155.81839 | S. Zdraljevic | 2017-08-15 |
| ECA734 | ECA738 | 21.13927631 | -156.97406 | S. Brady      | 2017-08-12 |
| ECA735 | ECA738 | 21.13927631 | -156.97406 | S. Brady      | 2017-08-12 |
| ECA736 | ECA738 | 21.13927631 | -156.97406 | S. Brady      | 2017-08-12 |
| ECA737 | ECA738 | 21.13927631 | -156.97406 | S. Brady      | 2017-08-12 |
| ECA738 | ECA738 | 21.13927631 | -156.97406 | S. Brady      | 2017-08-12 |
| ECA739 | ECA760 | 20.039869   | -155.44162 | D. Cook       | 2017-08-17 |
| ECA740 | ECA740 | 20.670022   | -156.33919 | B. Rodriguez  | 2017-08-14 |
| ECA741 | ECA741 | 20.6762     | -156.33832 | B. Rodriguez  | 2017-08-14 |
| ECA742 | ECA742 | 20.80569    | -156.2781  | K. Evans      | 2017-08-16 |
| ECA743 | ECA743 | 20.741871   | -156.32317 | K. Evans      | 2017-08-16 |
| ECA744 | ECA744 | 19.719231   | -155.94957 | S. Zdraljevic | 2017-08-15 |
| ECA745 | ECA745 | 19.700464   | -155.95584 | E. Andersen   | 2017-08-15 |

|        |        |           |            |               |            |
|--------|--------|-----------|------------|---------------|------------|
| ECA746 | ECA746 | 19.115292 | -155.81934 | S. Zdraljevic | 2017-08-15 |
| ECA747 | ECA745 | 19.700464 | -155.95584 | E. Andersen   | 2017-08-15 |
| ECA748 | ECA812 | 20.039847 | -155.44149 | D. Cook       | 2017-08-17 |
| ECA749 | ECA760 | 20.039875 | -155.44161 | D. Cook       | 2017-08-17 |
| ECA750 | ECA812 | 20.039847 | -155.44149 | D. Cook       | 2017-08-17 |
| ECA751 | ECA812 | 20.039847 | -155.44149 | D. Cook       | 2017-08-17 |
| ECA752 | ECA760 | 20.039847 | -155.44149 | D. Cook       | 2017-08-17 |
| ECA753 | ECA760 | 20.039847 | -155.44149 | D. Cook       | 2017-08-17 |
| ECA754 | ECA760 | 20.039869 | -155.44146 | D. Lee        | 2017-08-17 |
| ECA755 | ECA812 | 20.039869 | -155.44146 | D. Lee        | 2017-08-17 |
| ECA756 | ECA778 | 20.039822 | -155.44153 | D. Cook       | 2017-08-17 |
| ECA757 | ECA778 | 20.039822 | -155.44153 | D. Cook       | 2017-08-17 |
| ECA758 | ECA760 | 20.039886 | -155.44153 | D. Lee        | 2017-08-17 |
| ECA759 | ECA812 | 20.039886 | -155.44153 | D. Lee        | 2017-08-17 |
| ECA760 | ECA760 | 20.039869 | -155.44162 | D. Cook       | 2017-08-17 |
| ECA761 | ECA812 | 20.039847 | -155.44149 | D. Cook       | 2017-08-17 |
| ECA762 | ECA812 | 20.039822 | -155.44153 | D. Cook       | 2017-08-17 |
| ECA763 | ECA778 | 20.039878 | -155.44161 | D. Cook       | 2017-08-17 |
| ECA764 | ECA778 | 20.039878 | -155.44161 | D. Cook       | 2017-08-17 |
| ECA765 | ECA778 | 20.039878 | -155.44161 | D. Cook       | 2017-08-17 |
| ECA766 | ECA778 | 20.039878 | -155.44161 | D. Cook       | 2017-08-17 |
| ECA767 | ECA778 | 20.039878 | -155.44161 | D. Cook       | 2017-08-17 |
| ECA768 | ECA768 | 20.039914 | -155.44156 | D. Cook       | 2017-08-17 |
| ECA769 | ECA760 | 20.039869 | -155.44162 | D. Cook       | 2017-08-17 |
| ECA770 | ECA807 | 20.039869 | -155.44153 | D. Lee        | 2017-08-17 |
| ECA771 | ECA812 | 20.039864 | -155.44164 | D. Cook       | 2017-08-17 |
| ECA772 | ECA768 | 20.039908 | -155.4415  | D. Lee        | 2017-08-17 |
| ECA773 | ECA812 | 20.039864 | -155.44164 | D. Cook       | 2017-08-17 |
| ECA774 | ECA812 | 20.039869 | -155.44153 | D. Lee        | 2017-08-17 |
| ECA775 | ECA812 | 20.039869 | -155.44153 | D. Lee        | 2017-08-17 |
| ECA776 | ECA812 | 20.039869 | -155.44153 | D. Lee        | 2017-08-17 |
| ECA777 | ECA777 | 20.039908 | -155.4415  | D. Lee        | 2017-08-17 |
| ECA778 | ECA778 | 20.039908 | -155.4415  | D. Lee        | 2017-08-17 |
| ECA779 | ECA760 | 20.039858 | -155.44161 | D. Cook       | 2017-08-17 |
| ECA780 | ECA760 | 20.039858 | -155.44161 | D. Cook       | 2017-08-17 |
| ECA781 | ECA778 | 20.039858 | -155.44161 | D. Cook       | 2017-08-17 |
| ECA782 | ECA812 | 20.039875 | -155.44161 | D. Cook       | 2017-08-17 |



|        |        |            |            |                                |            |
|--------|--------|------------|------------|--------------------------------|------------|
| ECA783 | ECA812 | 20.039783  | -155.44148 | D. Lee                         | 2017-08-17 |
| ECA784 | ECA760 | 20.039783  | -155.44148 | D. Lee                         | 2017-08-17 |
| ECA785 | ECA760 | 20.039783  | -155.44148 | D. Lee                         | 2017-08-17 |
| ECA786 | ECA812 | 20.039875  | -155.44161 | D. Cook                        | 2017-08-17 |
| ECA787 | ECA812 | 20.039783  | -155.44148 | D. Lee                         | 2017-08-17 |
| ECA807 | ECA807 | 20.039869  | -155.44153 | D. Lee                         | 2017-08-17 |
| ECA808 | ECA760 | 20.039858  | -155.44161 | D. Cook                        | 2017-08-17 |
| ECA809 | ECA812 | 20.039783  | -155.44148 | D. Lee                         | 2017-08-17 |
| ECA810 | ECA778 | 20.039897  | -155.44153 | D. Lee                         | 2017-08-17 |
| ECA811 | ECA778 | 20.039897  | -155.44153 | D. Lee                         | 2017-08-17 |
| ECA812 | ECA812 | 20.039917  | -155.44154 | D. Lee                         | 2017-08-17 |
| ECA813 | ECA812 | 20.039917  | -155.44154 | D. Lee                         | 2017-08-17 |
| ECA822 | ECA705 | 20.038831  | -155.43892 | S. Zdraljevic                  | 2017-08-13 |
| ECA922 | ECA923 | 21.290067  | -157.70792 | N. Singh                       | 2017-12-01 |
| ECA923 | ECA923 | 21.290067  | -157.70792 | N. Singh                       | 2017-12-01 |
| ECA924 | ECA923 | 21.290067  | -157.70792 | N. Singh                       | 2017-12-01 |
| ECA925 | ECA923 | 21.290067  | -157.70792 | N. Singh                       | 2017-12-01 |
| ECA926 | ECA928 | 21.290067  | -157.70792 | N. Singh                       | 2017-12-01 |
| ECA927 | ECA923 | 21.290067  | -157.70792 | N. Singh                       | 2017-12-01 |
| ECA928 | ECA928 | 21.290067  | -157.70792 | N. Singh                       | 2017-12-01 |
| ECA930 | ECA930 | 31.778363  | 35.197931  | E. Bokman, A. Topper, C. Pritz | 2017-12-14 |
| ED3005 | ED3005 | 55.94      | -3.36      | A. Cutter                      | 2004-10-25 |
| ED3011 | ED3011 | 55.92      | -3.19      | A. Cutter                      | 2004-11-11 |
| ED3012 | ED3012 | 55.92      | -3.19      | A. Cutter                      | 2004-11-26 |
| ED3017 | ED3017 | 55.92      | -3.19      | A. Cutter                      | 2004-12-03 |
| ED3040 | ED3040 | -26.166667 | 28.016667  | E. Dolgin                      | 2006-05-05 |
| ED3046 | ED3046 | -33.366667 | 19.316667  | E. Dolgin                      | 2006-05-05 |
| ED3048 | ED3048 | -33.366667 | 19.316667  | E. Dolgin                      | 2006-04-02 |
| ED3049 | ED3049 | -33.366667 | 19.316667  | E. Dolgin                      | 2006-04-02 |
| ED3052 | ED3052 | -33.366667 | 19.316667  | E. Dolgin                      | 2006-05-05 |
| ED3073 | ED3073 | -1.083333  | 36.65      | E. Dolgin                      | 2006-05-17 |
| ED3077 | ED3077 | -1.316667  | 36.8       | E. Dolgin                      | 2006-05-17 |
| EG4347 | EG4347 | 44.04789   | -123.07108 | M. Ailion                      | 2006-10-09 |
| EG4349 | EG4349 | 40.771467  | -111.87316 | M. Ailion                      | 2006-10-02 |
| EG4724 | EG4724 | 41.6288    | -8.3476    | M. Ailion                      | 2007-03-28 |
| EG4725 | EG4725 | 41.6288    | -8.3476    | M. Ailion                      | 2007-03-28 |
| EG4946 | EG4946 | 40.72596   | -111.82184 | G. Hollopeter                  | 2007-09-27 |

|         |         |           |            |              |            |
|---------|---------|-----------|------------|--------------|------------|
| GXW1    | GXW1    | 30.542889 | 114.419828 | G. Wang      | 2010-11-05 |
| JT11398 | JT11398 | 47.763944 | -122.27548 | J. Kemner    | 2003-12-01 |
| JU1088  | JU1088  | 34.7613   | 138.0149   | M.-A. Félix  | 2007-03-14 |
| JU1172  | JU1172  | -36.87    | -73.04     | M.-A. Félix  | 2007-04-01 |
| JU1200  | JU1200  | 55.577    | -4.6       | T. Page      | 2007-08-01 |
| JU1212  | JU1212  | 48.71     | -3.81      | M.-A. Félix  | 2007-09-24 |
| JU1213  | JU1213  | 48.71     | -3.81      | M.-A. Félix  | 2007-09-24 |
| JU1242  | JU1242  | 49.1269   | 1.9595     | M.-A. Félix  | 2007-10-14 |
| JU1246  | JU1246  | 49.12618  | 1.96152    | M.-A. Félix  | 2007-10-14 |
| JU1249  | JU1249  | 49.126    | 1.951      | M.-A. Félix  | 2007-10-14 |
| JU1395  | JU1395  | 47.2199   | 0.04619    | M.-A. Félix  | 2008-03-01 |
| JU1400  | JU1400  | 37.3845   | -5.988     | M.-A. Félix  | 2008-03-29 |
| JU1409  | JU1409  | 37.468    | -5.637     | M.-A. Félix  | 2008-03-31 |
| JU1440  | JU1440  | 41.41307  | 2.15231    | M.-A. Félix  | 2008-06-09 |
| JU1491  | JU1491  | 46.63     | 1.06       | M.-A. Félix  | 2008-08-17 |
| JU1516  | JU1581  | 48.7015   | 2.1725     | M.-A. Félix  | 2008-09-09 |
| JU1530  | JU1530  | 48.7015   | 2.1725     | M.-A. Félix  | 2008-09-09 |
| JU1543  | JU1543  | 48.7015   | 2.1725     | M.-A. Félix  | 2008-09-08 |
| JU1568  | JU1568  | 48.8092   | 2.3862     | M.-A. Félix  | 2008-10-05 |
| JU1580  | JU1580  | 48.7015   | 2.1725     | M.-A. Félix  | 2008-10-06 |
| JU1581  | JU1581  | 48.7015   | 2.1725     | M.-A. Félix  | 2008-10-23 |
| JU1586  | JU1586  | 46.63     | 1.06       | M.-A. Félix  | 2008-11-03 |
| JU1652  | JU1652  | -34.86    | -56.19     | R. Giordano  | 2009       |
| JU1656  | JU1213  | 48.7049   | -3.7941    | M.-A. Félix  | 2009-07-14 |
| JU1666  | JU1666  | 48.7049   | -3.7941    | M.-A. Félix  | 2009-07-14 |
| JU1762  | JU1213  | 48.695548 | -3.790033  | M.-A. Félix  | 2009-08-16 |
| JU1770  | JU1213  | 48.695548 | -3.790033  | M.-A. Félix  | 2009-08-16 |
| JU1792  | JU1792  | 46.63278  | 1.064289   | M.-A. Félix  | 2009-09-27 |
| JU1793  | JU1793  | 49.12604  | 1.95114    | M.-A. Félix  | 2009-10-10 |
| JU1807  | JU1581  | 48.662134 | 2.2131     | M.-A. Félix  | 2008-10-23 |
| JU1808  | JU1808  | 48.81257  | 2.395372   | M.-A. Félix  | 2009-10-14 |
| JU1896  | JU1896  | 37.999722 | 23.749673  | M. Barkoulas | 2010-01-02 |
| JU1920  | JU1793  | 49.12604  | 1.95114    | M.-A. Félix  | 2009-10-25 |
| JU1922  | JU1793  | 49.12604  | 1.95114    | M.-A. Félix  | 2009-10-25 |
| JU1924  | JU2600  | 49.12604  | 1.95114    | M.-A. Félix  | 2009-10-25 |
| JU1929  | JU1793  | 49.12604  | 1.95114    | M.-A. Félix  | 2009-10-25 |
| JU1934  | JU1934  | 49.12604  | 1.95114    | M.-A. Félix  | 2009-10-25 |

|        |        |           |            |                          |            |
|--------|--------|-----------|------------|--------------------------|------------|
| JU1960 | CB4858 | 34.18973  | -118.13132 | J. DeModena              | 2008-11-30 |
| JU2001 | JU2001 | -21.1     | 55.5       | T. Béliard               | 2010-09-01 |
| JU2007 | JU2007 | 50.7608   | -1.32413   | M. Barkoulas             | 2010-10-16 |
| JU2016 | JU2016 | 37.757593 | -122.46318 | C. Nelson                | 2010-11-01 |
| JU2017 | JU2017 | 37.757593 | -122.46318 | C. Nelson                | 2010-11-01 |
| JU2106 | JU2106 | 43.06     | 0.24       | M.-A. Félix              | 2011-07-10 |
| JU2131 | JU2131 | 48.0497   | -4.705     | M.-A. Félix              | 2011-08-09 |
| JU2139 | JU1793 | 46.63278  | 1.064289   | M.-A. Félix              | 2011-10-23 |
| JU2141 | JU2141 | 46.6293   | 1.0512     | M.-A. Félix              | 2011-10-23 |
| JU2151 | JU2600 | 49.121    | 1.951      | M.-A. Félix              | 2011-10-31 |
| JU2234 | JU2234 | 47.227    | -1.583     | L. Frézal                | 2012-11-11 |
| JU2250 | JU2250 | 48.285278 | -1.891389  | L. Frézal                | 2012-11-15 |
| JU2257 | JU2257 | 46.6      | 1.1        | M.-A. Félix              | 2013-08-15 |
| JU2287 | JU2257 | 46.6      | 1.1        | M.-A. Félix              | 2013-08-15 |
| JU2316 | JU2316 | 38.7175   | -9.1486    | M.-A. Félix              | 2013-08-25 |
| JU2460 | JU792  | 48.6934   | -3.9251    | M.-A. Félix              | 2012-12-28 |
| JU2464 | JU2464 | -13.155   | -72.525    | L. Lokmane               | 2013-01    |
| JU2466 | JU2466 | -13.257   | -72.266    | L. Lokmane               | 2013-01    |
| JU2467 | JU2464 | -13.155   | -72.525    | L. Lokmane               | 2013-01    |
| JU2468 | JU2464 | -13.155   | -72.525    | L. Lokmane               | 2013-01    |
| JU2478 | JU2478 | 50.85     | 4.351      | D. Thieffry              | 2013-02-01 |
| JU2513 | JU2513 | 38.26016  | 22.0736    | M.-A. Félix              | 2013-05-07 |
| JU2519 | JU2519 | 38.7175   | -9.1486    | M.-A. Félix              | 2013-08-25 |
| JU2522 | JU2522 | 38.7175   | -9.1486    | M.-A. Félix              | 2013-08-25 |
| JU2526 | JU2526 | 38.7175   | -9.1486    | M.-A. Félix              | 2013-08-25 |
| JU2527 | JU792  | 47.8797   | -3.5999    | F. Besnard               | 2013-08-19 |
| JU2534 | JU2534 | 49.357921 | 0.097087   | S. Marsh                 | 2013-06-09 |
| JU2565 | JU2565 | 44.958394 | 1.066213   | T. Béliard               | 2013-10-05 |
| JU2566 | JU2566 | 48.83886  | 2.44599    | M.-A. Félix              | 2013-10-02 |
| JU2570 | JU2570 | 46.2657   | -0.2685    | F. Besnard               | 2013-11-13 |
| JU2572 | JU2572 | 48.81257  | 2.395372   | S. Marsh                 | 2013-10-01 |
| JU2575 | JU2575 | 49.0857   | 3.0707     | M.-A. Félix and S. Marsh | 2013-10-26 |
| JU2576 | JU2576 | 49.0861   | 3.072      | M.-A. Félix and S. Marsh | 2013-10-26 |
| JU2578 | JU2578 | 48.87613  | 2.4315     | M.-A. Félix              | 2013-10-27 |
| JU258  | JU258  | 32.73     | -16.89     | M.-A. Félix              | 2001-10-01 |
| JU2581 | JU2581 | 46.6      | 1.1        | M.-A. Félix              | 2013-11-03 |
| JU2586 | JU2586 | 48.897    | 2.159      | A. Zalmanski             | 2013-11-11 |

|        |        |           |            |                          |            |
|--------|--------|-----------|------------|--------------------------|------------|
| JU2587 | JU2587 | 45.026713 | 3.872016   | A. Richaud               | 2013-11-10 |
| JU2592 | JU2592 | 48.628558 | -2.403836  | L. Frézal                | 2013-11-11 |
| JU2593 | JU2593 | 48.822556 | 2.222334   | O. Bensaude              | 2013       |
| JU2600 | JU2600 | 49.1242   | 1.9496     | M.-A. Félix and S. Marsh | 2013-11-20 |
| JU2604 | JU1793 | 49.16477  | 1.86175    | M.-A. Félix and S. Marsh | 2013-11-20 |
| JU2605 | JU1793 | 49.166    | 1.86       | M.-A. Félix and S. Marsh | 2013-11-20 |
| JU2610 | JU2610 | 49.1075   | 1.7915     | M.-A. Félix and S. Marsh | 2013-11-20 |
| JU2619 | JU2619 | 32.998352 | -117.27543 | S. Marsh                 | 2014-01    |
| JU2800 | JU2800 | 48.79     | 2.331      | M. Casado                | 2014-09-01 |
| JU2802 | JU2800 | 48.9067   | 2.14167    | F. Besnard               | 2014-09-14 |
| JU2811 | JU2811 | -33.8632  | 151.219453 | S. Marsh                 | 2014-09-24 |
| JU2825 | JU2825 | 48.8092   | 2.3862     | R. Luallen               | 2014-11-14 |
| JU2828 | JU2829 | 46.632    | 1.064      | M.-A. Félix              | 2010-10-03 |
| JU2829 | JU2829 | 46.632    | 1.064      | M.-A. Félix              | 2010-10-03 |
| JU2830 | JU2829 | 46.632    | 1.064      | M.-A. Félix              | 2010-10-03 |
| JU2838 | JU2838 | 20.205961 | -97.98832  | A. Vargas Velazquez      | 2015       |
| JU2841 | JU2841 | -40       | 176        | M. Wilson                | 2015-03-01 |
| JU2853 | JU2853 | 41.19     | -7.545     | M. Félix and B. Félix    | 2015-05-01 |
| JU2860 | JU1200 | 52.19842  | 0.115365   | M.-A. Félix              | 2015-06-06 |
| JU2862 | JU2862 | 52.1944   | 0.1264     | M.-A. Félix              | 2015-06-06 |
| JU2866 | JU2866 | 34.0751   | -118.4409  | M.-A. Félix              | 2015-06-28 |
| JU2878 | JU2878 | 19.29732  | -99.098769 | A. Vargas Velazquez      | 2015-07-02 |
| JU2879 | JU2879 | 19.29732  | -99.098769 | A. Vargas Velazquez      | 2015-07-02 |
| JU2906 | JU2906 | 43.8023   | 11.2806    | M.-A. Félix              | 2015-12-13 |
| JU2907 | JU2907 | 43.8021   | 11.2906    | M.-A. Félix              | 2015-12-13 |
| JU2908 | JU2907 | 43.8063   | 11.2839    | M.-A. Félix              | 2015-12-13 |
| JU310  | JU310  | 46.63     | 1.06       | M.-A. Félix              | 2002-08-25 |
| JU311  | JU311  | 44.42     | 4.4        | M.-A. Félix              | 2002-09-08 |
| JU312  | JU311  | 44.42     | 4.4        | M.-A. Félix              | 2002-09-08 |
| JU3125 | JU3125 | 38.1127   | 13.3722    | M.-A. Félix              | 2016-04-20 |
| JU3127 | JU3127 | 38.11196  | 13.37274   | M.-A. Félix              | 2016-04-20 |
| JU3128 | JU3128 | 37.076    | 15.2763    | M.-A. Félix              | 2016-04-23 |
| JU3131 | JU323  | 48.7015   | 2.1725     | M.-A. Félix              | 2008-10-23 |
| JU3132 | JU3132 | 48.7015   | 2.1725     | M.-A. Félix              | 2011-10-10 |
| JU3133 | JU1440 | 48.7015   | 2.1725     | M.-A. Félix              | 2011-11-08 |
| JU3134 | JU3134 | 48.7015   | 2.1725     | M.-A. Félix              | 2011-11-11 |
| JU3135 | JU3135 | 48.7015   | 2.1725     | M.-A. Félix              | 2013-10-29 |

|        |        |            |            |                            |            |
|--------|--------|------------|------------|----------------------------|------------|
| JU3136 | MY2453 | 48.7015    | 2.1725     | M.-A. Félix                | 2013-11-13 |
| JU3137 | JU3137 | 48.7015    | 2.1725     | M.-A. Félix                | 2014-10-20 |
| JU3138 | JU2600 | 49.1269    | 1.9595     | M.-A. Félix                | 2011-11-07 |
| JU3139 | JU1666 | 48.71      | -3.81      | M.-A. Félix                | 2009-08-09 |
| JU3140 | JU3140 | 48.71      | -3.81      | M.-A. Félix                | 2009-08-09 |
| JU3141 | JU3141 | 48.71      | -3.81      | M.-A. Félix                | 2009-08-09 |
| JU3142 | JU792  | 48.71      | -3.81      | M.-A. Félix                | 2009-08-09 |
| JU3144 | JU3144 | 6.18       | 10.52      | J. David                   | 2016-05-01 |
| JU315  | JU311  | 44.2       | 4.4        | M.-A. Félix                | 2002-09-08 |
| JU3166 | JU3166 | 0.28       | 6.59837    | M.-A. Félix                | 2016-09-19 |
| JU3167 | JU3167 | 0.289      | 6.612      | J. David                   | 2016-09-21 |
| JU3169 | JU3169 | 0.289      | 6.612      | J. David                   | 2016-09-21 |
| JU3224 | JU3224 | -41.296186 | 174.784857 | J. Ewbank                  | 2017-04-01 |
| JU3225 | JU3225 | -41.296186 | 174.784857 | N. Pujol                   | 2017-04-02 |
| JU3226 | JU3226 | -41.29085  | 174.76872  | N. Pujol                   | 2017-04-03 |
| JU3227 | JU3228 | -38.64844  | 176.08947  | N. Pujol                   | 2017-04-04 |
| JU3228 | JU3228 | -39.02256  | 175.71458  | N. Pujol                   | 2017-04-05 |
| JU323  | JU323  | 44.42      | 4.4        | M.-A. Félix                | 2002-09-08 |
| JU3271 | JU1793 | 49.11      | 1.93       | M.-A. Félix and E. Troemel | NA         |
| JU3280 | JU3280 | 50.07182   | 14.42333   | M.-A. Félix                | 2017-09-24 |
| JU3282 | JU3282 | 50.0711    | 14.42028   | M.-A. Félix                | 2017-09-24 |
| JU3291 | JU3291 | 48.7679    | 2.70719    | M.-A. Félix                | 2017-10-08 |
| JU345  | JU346  | 44.42      | 4.4        | M.-A. Félix                | 2002-09-08 |
| JU346  | JU346  | 44.42      | 4.4        | M.-A. Félix                | 2002-09-08 |
| JU360  | JU360  | 48.98      | 2.23       | C. Pieau                   | 2002-09-16 |
| JU363  | JU360  | 48.98      | 2.23       | C. Pieau                   | 2002-09-16 |
| JU367  | JU367  | 48.98      | 2.23       | C. Pieau                   | 2002-09-16 |
| JU393  | JU393  | 49.28      | -0.32      | A. Barrière                | 2002-09-01 |
| JU394  | JU394  | 49.28      | -0.32      | A. Barrière                | 2002-09-01 |
| JU397  | JU397  | 49.28      | -0.32      | A. Barrière                | 2002-09-01 |
| JU406  | JU406  | 49.28      | -0.32      | A. Barrière                | 2002-12-30 |
| JU440  | JU440  | 48.715     | 1.56       | D. Baille                  | 2003-09-12 |
| JU561  | JU561  | 48.71      | -3.81      | M.-A. Félix                | 2004-10-03 |
| JU642  | JU642  | 48.84      | 2.5        | J.-A. Lepsant              | 2004-12-14 |
| JU751  | JU751  | 48.84      | 2.5        | J.-A. Lepsant              | 2005-06-08 |
| JU774  | JU774  | 38.683     | -9.34      | M.-A. Félix                | 2005-07-10 |
| JU775  | JU775  | 38.7175    | -9.1486    | M.-A. Félix                | 2005-07-10 |

|        |        |           |           |                |            |
|--------|--------|-----------|-----------|----------------|------------|
| JU778  | JU778  | 38.719    | -9.1491   | M.-A. Félix    | 2005-07-10 |
| JU782  | JU782  | 38.7191   | -9.1503   | M.-A. Félix    | 2005-07-10 |
| JU792  | JU792  | 43.06     | 0.24      | M.-A. Félix    | 2005-08-31 |
| JU830  | JU830  | 48.52     | 9.05      | R. Hong        | 2005-09-28 |
| JU847  | JU847  | 48.46     | 7.461     | M.-A. Félix    | 2005-10-03 |
| KR314  | KR314  | 49.28     | -123.13   | F. Dill        | 1984-05-01 |
| LKC34  | LKC34  | -18       | 46        | V. Stowell     | 2005-06-17 |
| MY1    | MY1    | 52.54     | 7.31      | H. Schulenburg | 2002-07-01 |
| MY10   | MY10   | 51.96     | 7.53      | H. Schulenburg | 2002-07-01 |
| MY16   | MY16   | 51.93     | 7.57      | H. Schulenburg | 2002-07-01 |
| MY18   | MY18   | 51.96     | 7.53      | H. Schulenburg | 2002-07-01 |
| MY2001 | MY2453 | 51.950777 | 7.536628  | C. Petersen    | 2012-06-20 |
| MY2004 | MY2453 | 51.950777 | 7.536628  | C. Petersen    | 2012-06-20 |
| MY2011 | MY2453 | 51.950777 | 7.536628  | C. Petersen    | 2012-07-04 |
| MY2014 | MY2453 | 51.950777 | 7.536628  | C. Petersen    | 2012-07-04 |
| MY2022 | RC301  | 54.346355 | 10.117737 | C. Petersen    | 2012-07-04 |
| MY2024 | RC301  | 54.346355 | 10.117737 | C. Petersen    | 2012-07-04 |
| MY2042 | MY920  | 54.346355 | 10.117737 | C. Petersen    | 2012-07-18 |
| MY2050 | MY2453 | 51.950777 | 7.536628  | C. Petersen    | 2012-07-18 |
| MY2051 | MY2453 | 51.950777 | 7.536628  | C. Petersen    | 2012-07-18 |
| MY2054 | MY2453 | 51.950777 | 7.536628  | C. Petersen    | 2012-07-18 |
| MY2078 | RC301  | 54.346355 | 10.117737 | C. Petersen    | 2012-08-01 |
| MY2097 | MY920  | 54.346355 | 10.117737 | C. Petersen    | 2012-08-15 |
| MY2099 | MY795  | 54.346355 | 10.117737 | C. Petersen    | 2012-08-15 |
| MY2109 | MY2741 | 54.346355 | 10.117737 | C. Petersen    | 2012-08-15 |
| MY2121 | MY2453 | 51.950777 | 7.536628  | C. Petersen    | 2012-08-15 |
| MY2137 | MY2453 | 51.950777 | 7.536628  | C. Petersen    | 2012-09-17 |
| MY2138 | MY920  | 54.346355 | 10.117737 | C. Petersen    | 2012-09-17 |
| MY2142 | MY2573 | 51.950723 | 7.599099  | C. Petersen    | 2012-09-17 |
| MY2143 | MY2147 | 54.346355 | 10.117737 | C. Petersen    | 2012-09-17 |
| MY2144 | MY2573 | 51.950723 | 7.599099  | C. Petersen    | 2012-09-17 |
| MY2147 | MY2147 | 54.346355 | 10.117737 | C. Petersen    | 2012-09-17 |
| MY2198 | MY2573 | 51.950723 | 7.599099  | C. Petersen    | 2012-09-26 |
| MY2199 | MY2453 | 51.950777 | 7.536628  | C. Petersen    | 2012-09-26 |
| MY2208 | MY2573 | 54.346355 | 10.117737 | C. Petersen    | 2012-09-26 |
| MY2212 | MY2212 | 54.346355 | 10.117737 | C. Petersen    | 2012-09-26 |
| MY2224 | MY2573 | 54.346355 | 10.117737 | C. Petersen    | 2012-09-26 |

|        |        |           |           |                |            |
|--------|--------|-----------|-----------|----------------|------------|
| MY2239 | MY2573 | 54.346355 | 10.117737 | C. Petersen    | 2012-09-26 |
| MY2282 | MY2573 | 51.950723 | 7.599099  | C. Petersen    | 2012-10-10 |
| MY2288 | MY2453 | 51.950777 | 7.536628  | C. Petersen    | 2012-10-10 |
| MY2291 | RC301  | 54.346355 | 10.117737 | C. Petersen    | 2012-10-10 |
| MY2294 | MY2573 | 51.950723 | 7.599099  | C. Petersen    | 2012-10-10 |
| MY23   | MY23   | 51.96     | 7.53      | H. Schulenburg | 2002-07-01 |
| MY2338 | MY2573 | 51.950723 | 7.599099  | C. Petersen    | 2012-10-24 |
| MY2339 | MY2453 | 51.950777 | 7.536628  | C. Petersen    | 2012-10-24 |
| MY2344 | MY2535 | 51.950723 | 7.599099  | C. Petersen    | 2012-10-24 |
| MY2347 | MY920  | 54.346355 | 10.117737 | C. Petersen    | 2012-10-24 |
| MY2373 | MY920  | 54.346355 | 10.117737 | C. Petersen    | 2012-10-24 |
| MY2406 | MY920  | 54.346355 | 10.117737 | C. Petersen    | 2012-10-24 |
| MY2434 | MY2573 | 51.950723 | 7.599099  | C. Petersen    | 2012-11-07 |
| MY2443 | MY2573 | 51.950723 | 7.599099  | C. Petersen    | 2012-11-07 |
| MY2453 | MY2453 | 51.950777 | 7.536628  | C. Petersen    | 2012-11-07 |
| MY2479 | MY920  | 54.346355 | 10.117737 | C. Petersen    | 2012-11-21 |
| MY2481 | JU311  | 54.346355 | 10.117737 | C. Petersen    | 2012-11-21 |
| MY2491 | MY2573 | 51.950723 | 7.599099  | C. Petersen    | 2012-11-21 |
| MY2502 | MY2453 | 51.950777 | 7.536628  | C. Petersen    | 2012-11-21 |
| MY2530 | MY2530 | 54.346355 | 10.117737 | C. Petersen    | 2012-12-05 |
| MY2532 | MY2535 | 54.346355 | 10.117737 | C. Petersen    | 2012-12-05 |
| MY2535 | MY2535 | 51.950723 | 7.599099  | C. Petersen    | 2012-12-05 |
| MY2541 | MY2453 | 51.950777 | 7.536628  | C. Petersen    | 2012-12-05 |
| MY2573 | MY2573 | 51.950723 | 7.599099  | C. Petersen    | 2012-12-10 |
| MY2579 | MY2453 | 51.950777 | 7.536628  | C. Petersen    | 2012-12-10 |
| MY2585 | MY2585 | 54.346355 | 10.117737 | C. Petersen    | 2012-12-10 |
| MY2622 | MY2453 | 54.3491   | 10.11505  | R. Hermann     | 2013-08-09 |
| MY2623 | MY2585 | 54.3491   | 10.11505  | C. Petersen    | 2013-08-09 |
| MY2630 | RC301  | 54.3491   | 10.11505  | R. Hermann     | 2013-08-09 |
| MY2635 | MY2713 | 54.3491   | 10.11505  | R. Hermann     | 2013-08-23 |
| MY2636 | RC301  | 54.3491   | 10.11505  | R. Hermann     | 2013-08-23 |
| MY2640 | RC301  | 54.3491   | 10.11505  | R. Hermann     | 2013-08-23 |
| MY2679 | MY2713 | 54.3491   | 10.11505  | R. Hermann     | 2013-09-04 |
| MY2681 | RC301  | 54.3491   | 10.11505  | C. Petersen    | 2013-09-04 |
| MY2684 | RC301  | 54.3491   | 10.11505  | M. Barg        | 2013-08-19 |
| MY2685 | MY2693 | 54.3491   | 10.11505  | M. Barg        | 2013-08-19 |
| MY2688 | MY920  | 54.3491   | 10.11505  | M. Barg        | 2013-08-21 |

|        |        |           |           |             |            |
|--------|--------|-----------|-----------|-------------|------------|
| MY2689 | MY2713 | 54.3491   | 10.11505  | M. Barg     | 2013-08-21 |
| MY2691 | RC301  | 54.3491   | 10.11505  | R. Hermann  | 2013-07-31 |
| MY2692 | MY2741 | 54.3491   | 10.11505  | R. Hermann  | 2013-08-16 |
| MY2693 | MY2693 | 54.3491   | 10.11505  | R. Hermann  | 2013-08-15 |
| MY2713 | MY2713 | 54.3491   | 10.11505  | M. Barg     | 2013-09-03 |
| MY2719 | MY2693 | 54.3491   | 10.11505  | M. Barg     | 2013-09-05 |
| MY2741 | MY2741 | 54.3491   | 10.11505  | C. Petersen | 2014-09-01 |
| MY508  | MY2453 | 51.950777 | 7.536628  | C. Petersen | 2011-07-08 |
| MY518  | MY518  | 51.964154 | 7.611719  | C. Petersen | 2011-07-08 |
| MY524  | MY2453 | 51.950777 | 7.536628  | C. Petersen | 2011-11-28 |
| MY538  | MY795  | 54.346355 | 10.117737 | C. Petersen | 2011-08-25 |
| MY559  | MY2573 | 51.950723 | 7.599099  | C. Petersen | 2011-09-09 |
| MY561  | MY2453 | 51.950777 | 7.536628  | C. Petersen | 2011-09-08 |
| MY564  | MY2453 | 51.950777 | 7.536628  | C. Petersen | 2011-09-08 |
| MY570  | MY2453 | 51.950777 | 7.536628  | C. Petersen | 2011-09-08 |
| MY579  | MY2573 | 51.950723 | 7.599099  | C. Petersen | 2011-09-09 |
| MY589  | MY920  | 54.346355 | 10.117737 | C. Petersen | 2011-08-25 |
| MY673  | MY795  | 54.346355 | 10.117737 | C. Petersen | 2011-09-27 |
| MY679  | MY679  | 54.346355 | 10.117737 | C. Petersen | 2011-09-27 |
| MY684  | RC301  | 54.346355 | 10.117737 | C. Petersen | 2011-09-27 |
| MY710  | MY2573 | 51.950723 | 7.599099  | C. Petersen | 2011-10-12 |
| MY713  | MY2453 | 51.950777 | 7.536628  | C. Petersen | 2011-10-12 |
| MY741  | MY920  | 54.346355 | 10.117737 | C. Petersen | 2011-10-10 |
| MY772  | MY772  | 54.346355 | 10.117737 | C. Petersen | 2011-09-27 |
| MY792  | MY2453 | 51.950777 | 7.536628  | C. Petersen | 2011-10-24 |
| MY795  | MY795  | 54.346355 | 10.117737 | C. Petersen | 2011-10-26 |
| MY803  | MY2713 | 54.346355 | 10.117737 | C. Petersen | 2011-11-03 |
| MY804  | MY2573 | 51.950723 | 7.599099  | C. Petersen | 2011-11-02 |
| MY819  | MY2453 | 51.950777 | 7.536628  | C. Petersen | 2011-11-02 |
| MY864  | MY2453 | 51.950723 | 7.599099  | C. Petersen | 2011-11-14 |
| MY881  | MY2535 | 51.950723 | 7.599099  | C. Petersen | 2011-12-01 |
| MY882  | RC301  | 54.346355 | 10.117737 | C. Petersen | 2011-12-01 |
| MY887  | MY920  | 54.346355 | 10.117737 | C. Petersen | 2011-12-08 |
| MY904  | MY2453 | 51.950777 | 7.536628  | C. Petersen | 2011-12-08 |
| MY920  | MY920  | 54.346355 | 10.117737 | C. Petersen | 2012-01-18 |
| MY934  | MY2573 | 51.950723 | 7.599099  | C. Petersen | 2012-01-25 |
| MY965  | MY2453 | 51.950777 | 7.536628  | C. Petersen | 2012-05-09 |



|         |         |            |            |                            |            |
|---------|---------|------------|------------|----------------------------|------------|
| MY990   | MY920   | 54.346355  | 10.117737  | C. Petersen                | 2012-05-23 |
| MY991   | MY679   | 54.346355  | 10.117737  | C. Petersen                | 2012-06-20 |
| N2      | N2      | 51.45      | -2.59      | W. Nicholas                | 1951       |
| NIC1    | NIC1    | 43.279     | 5.3543     | C. Braendle                | 2008-09-14 |
| NIC1049 | NIC1049 | 43.593561  | 1.45032    | C. Braendle                | 2014-10-14 |
| NIC1107 | NIC1107 | 43.716278  | 7.266935   | A. Vielle and P. Vigne     | 2014-11-25 |
| NIC1119 | NIC1119 | -13.421743 | -71.849508 | C. Braendle                | 2015-06-04 |
| NIC1604 | MY2573  | 38.596     | -0.0859    | C. Braendle                | 2017-05-01 |
| NIC166  | NIC166  | 46.72722   | 6.89775    | C. Braendle                | 2007-07-27 |
| NIC195  | NIC195  | 38.545874  | -28.37322  | D. Bourc'his and J. Dumont | 2011-08-22 |
| NIC196  | NIC195  | 38.4716405 | -28.20149  | D. Bourc'his and J. Dumont | 2011-08-23 |
| NIC197  | NIC195  | 38.39682   | -28.25165  | D. Bourc'his and J. Dumont | 2011-08-23 |
| NIC198  | NIC195  | 39.4364016 | -31.23849  | D. Bourc'his and J. Dumont | 2011-08-29 |
| NIC199  | NIC199  | 37.745428  | -25.19929  | D. Bourc'his and J. Dumont | 2011-03-09 |
| NIC2    | NIC2    | 43.279     | 5.3543     | C. Braendle                | 2008-09-14 |
| NIC200  | NIC199  | 37.74942   | -25.66489  | D. Bourc'his and J. Dumont | 2011-05-09 |
| NIC207  | NIC207  | 43.720505  | 7.24045    | C. Braendle                | 2011-09-21 |
| NIC231  | NIC231  | 43.720505  | 7.24045    | C. Braendle                | 2011-11-14 |
| NIC232  | NIC231  | 43.720505  | 7.24045    | C. Braendle                | 2011-11-14 |
| NIC236  | NIC236  | 39.242006  | -9.313417  | C. Braendle                | 2011-11-26 |
| NIC237  | NIC236  | 39.242006  | -9.313417  | C. Braendle                | 2011-11-26 |
| NIC242  | NIC242  | 38.691765  | -9.31609   | C. Braendle                | 2008-08-17 |
| NIC251  | NIC251  | 38.66621   | -28.151364 | S. Carvalho                | 2012-08-01 |
| NIC252  | NIC252  | 38.661313  | -28.147949 | S. Carvalho                | 2012-08-01 |
| NIC255  | NIC255  | 43.714834  | 7.266779   | C. Braendle                | 2012-11-18 |
| NIC256  | NIC256  | 38.71829   | -9.14875   | C. Braendle                | 2012-12-02 |
| NIC258  | NIC258  | 38.71829   | -9.14875   | C. Braendle                | 2012-12-02 |
| NIC259  | NIC259  | 38.71829   | -9.14875   | C. Braendle                | 2012-12-02 |
| NIC260  | NIC260  | 38.71829   | -9.14875   | C. Braendle                | 2012-12-02 |
| NIC261  | NIC261  | 38.71829   | -9.14875   | C. Braendle                | 2012-12-02 |
| NIC262  | NIC262  | 38.71829   | -9.14875   | C. Braendle                | 2012-12-02 |
| NIC263  | NIC256  | 38.71829   | -9.14875   | C. Braendle                | 2012-12-02 |
| NIC265  | NIC265  | 38.71829   | -9.14875   | C. Braendle                | 2012-12-02 |
| NIC266  | NIC266  | 38.69237   | -9.31592   | C. Braendle                | 2012-12-07 |
| NIC267  | NIC267  | 38.69237   | -9.31592   | C. Braendle                | 2012-12-07 |
| NIC268  | NIC268  | 38.69237   | -9.31592   | C. Braendle                | 2012-12-07 |
| NIC269  | NIC269  | 38.69237   | -9.31592   | C. Braendle                | 2012-12-07 |

|        |        |           |            |             |            |
|--------|--------|-----------|------------|-------------|------------|
| NIC270 | NIC270 | 38.69237  | -9.31592   | C. Braendle | 2012-12-07 |
| NIC271 | NIC271 | 38.69237  | -9.31592   | C. Braendle | 2012-12-07 |
| NIC272 | NIC272 | 39.769459 | -8.756356  | C. Braendle | 2012-12-09 |
| NIC273 | NIC272 | 39.769459 | -8.756356  | C. Braendle | 2012-12-09 |
| NIC274 | NIC274 | 39.769459 | -8.756356  | C. Braendle | 2012-12-09 |
| NIC275 | NIC275 | 39.769459 | -8.756356  | C. Braendle | 2012-12-09 |
| NIC276 | NIC276 | 39.769459 | -8.756356  | C. Braendle | 2012-12-09 |
| NIC277 | NIC277 | 43.716441 | 7.266138   | C. Braendle | 2012-12-15 |
| NIC3   | NIC3   | 43.3636   | 5.3215     | C. Braendle | 2008-09-28 |
| NIC4   | NIC3   | 43.3636   | 5.3215     | C. Braendle | 2008-09-28 |
| NIC501 | NIC501 | 48.77302  | 2.2675     | C. Braendle | 2013-09-14 |
| NIC508 | MY2535 | 40.86183  | 14.261756  | C. Braendle | 2013-11-14 |
| NIC511 | NIC511 | 40.8625   | 14.2623855 | C. Braendle | 2013-11-14 |
| NIC512 | MY2535 | 40.8625   | 14.2623855 | C. Braendle | 2013-11-14 |
| NIC513 | NIC513 | 38.776038 | -9.167136  | C. Braendle | 2013-11-30 |
| NIC514 | NIC514 | 38.776038 | -9.167136  | C. Braendle | 2013-11-30 |
| NIC515 | NIC515 | 38.776775 | -9.165884  | C. Braendle | 2013-11-30 |
| NIC521 | NIC527 | 36.535679 | -6.304441  | C. Braendle | 2014-04-01 |
| NIC522 | NIC522 | 36.535679 | -6.304441  | C. Braendle | 2014-04-01 |
| NIC523 | NIC523 | 36.535679 | -6.29831   | C. Braendle | 2014-04-01 |
| NIC526 | NIC526 | 36.535679 | -6.304441  | C. Braendle | 2014-04-01 |
| NIC527 | NIC527 | 36.535679 | -6.304441  | C. Braendle | 2014-04-01 |
| NIC528 | NIC528 | 36.535679 | -6.29831   | C. Braendle | 2014-04-01 |
| NIC529 | NIC529 | 37.870754 | -4.784967  | C. Braendle | 2014-05-01 |
| PB303  | PB303  | NA        | NA         | S. Baird    | 1998-11-14 |
| PS2025 | PS2025 | 34.19     | -118.13    | J. DeModena | NA         |
| PX179  | PX179  | 44.035    | -123.058   | B. White    | 2001-10-02 |
| QG2075 | QG2075 | 33.951    | -83.376    | M. Rockman  | 2013-02-20 |
| QG2810 | QG2811 | -35.2542  | 149.1151   | M. Rockman  | 2017-04-02 |
| QG2811 | QG2811 | -35.2542  | 149.1151   | M. Rockman  | 2017-04-02 |
| QG2812 | QG2813 | -34.6342  | 150.7279   | M. Rockman  | 2017-03-30 |
| QG2813 | QG2813 | -34.6342  | 150.7279   | M. Rockman  | 2017-03-28 |
| QG2818 | QG2818 | -28.0474  | 152.3936   | M. Rockman  | 2017-04-12 |
| QG2823 | QG2823 | -34.4511  | 116.033    | M. Rockman  | 2017-05-23 |
| QG2824 | QG2824 | -34.4511  | 116.033    | M. Rockman  | 2017-05-23 |
| QG2825 | QG2825 | -34.4511  | 116.0328   | M. Rockman  | 2017-05-23 |
| QG2826 | QG2823 | -34.4511  | 116.0328   | M. Rockman  | 2017-05-23 |

|        |        |          |          |            |            |
|--------|--------|----------|----------|------------|------------|
| QG2827 | QG2827 | -31.9547 | 115.8446 | M. Rockman | 2017-05-24 |
| QG2828 | QG2828 | -31.9547 | 115.8446 | M. Rockman | 2017-05-24 |
| QG2829 | QG2827 | -31.9547 | 115.8446 | M. Rockman | 2017-05-24 |
| QG2830 | QG2832 | -27.3311 | 152.7636 | M. Rockman | 2017-05-31 |
| QG2831 | QG2832 | -27.3311 | 152.7636 | M. Rockman | 2017-05-31 |
| QG2832 | QG2832 | -27.3311 | 152.7636 | M. Rockman | 2017-05-30 |
| QG2833 | QG2832 | -27.3311 | 152.7636 | M. Rockman | 2017-05-30 |
| QG2834 | QG2835 | -27.3308 | 152.7592 | M. Rockman | 2017-05-30 |
| QG2835 | QG2835 | -27.3308 | 152.7592 | M. Rockman | 2017-05-30 |
| QG2836 | QG2836 | -27.3308 | 152.7592 | M. Rockman | 2017-06-01 |
| QG2837 | QG2837 | -27.3308 | 152.7592 | M. Rockman | 2017-06-02 |
| QG2838 | QG2838 | -27.3311 | 152.7636 | M. Rockman | 2017-06-02 |
| QG2839 | QG2841 | -28.2446 | 153.2089 | M. Rockman | 2017-06-06 |
| QG2840 | QG2841 | -28.2446 | 153.2089 | M. Rockman | 2017-06-06 |
| QG2841 | QG2841 | -28.2446 | 153.2063 | M. Rockman | 2017-06-06 |
| QG2842 | QG2841 | -28.2446 | 153.2063 | M. Rockman | 2017-06-06 |
| QG2843 | QG2843 | -28.2402 | 153.195  | M. Rockman | 2017-06-09 |
| QG2844 | QG2846 | -28.2043 | 153.1907 | M. Rockman | 2017-06-06 |
| QG2845 | QG2846 | -28.2043 | 153.1907 | M. Rockman | 2017-06-06 |
| QG2846 | QG2846 | -28.2043 | 153.1907 | M. Rockman | 2017-06-06 |
| QG2850 | QG2850 | -28.0845 | 152.5074 | M. Rockman | 2017-06-22 |
| QG2851 | QG2850 | -28.0845 | 152.5074 | M. Rockman | 2017-06-22 |
| QG2852 | QG2854 | -28.0826 | 152.5066 | M. Rockman | 2017-06-25 |
| QG2853 | QG2854 | -28.0826 | 152.5066 | M. Rockman | 2017-06-25 |
| QG2854 | QG2854 | -28.0806 | 152.5046 | M. Rockman | 2017-06-22 |
| QG2855 | QG2855 | -28.0806 | 152.5046 | M. Rockman | 2017-06-22 |
| QG2856 | QG2854 | -28.0806 | 152.5044 | M. Rockman | 2017-06-20 |
| QG2857 | QG2857 | -28.0806 | 152.5044 | M. Rockman | 2017-06-20 |
| QG2858 | QG2854 | -28.0801 | 152.5041 | M. Rockman | 2017-06-20 |
| QG2859 | QG2854 | -28.0801 | 152.5041 | M. Rockman | 2017-06-20 |
| QG2872 | QG2873 | -27.369  | 152.1831 | M. Rockman | 2017-06-25 |
| QG2873 | QG2873 | -27.369  | 152.1831 | M. Rockman | 2017-06-26 |
| QG2874 | QG2874 | -27.3686 | 152.1838 | M. Rockman | 2017-06-28 |
| QG2875 | QG2875 | -27.3672 | 152.1834 | M. Rockman | 2017-06-27 |
| QG2876 | QG2875 | -27.3672 | 152.1834 | M. Rockman | 2017-06-27 |
| QG2877 | QG2877 | -27.367  | 152.183  | M. Rockman | 2017-06-28 |
| QG2878 | QG2877 | -27.367  | 152.183  | M. Rockman | 2017-06-28 |

|        |        |           |            |             |            |
|--------|--------|-----------|------------|-------------|------------|
| QG2927 | QG2932 | -28.0538  | 152.3952   | M. Rockman  | 2017-07-26 |
| QG2928 | QG2932 | -28.0538  | 152.3952   | M. Rockman  | 2017-07-26 |
| QG2931 | QG2932 | -28.0538  | 152.3952   | M. Rockman  | 2017-07-26 |
| QG2932 | QG2932 | -28.0538  | 152.3952   | M. Rockman  | 2017-07-26 |
| QG536  | QG536  | 37.7679   | -122.4415  | M. Rockman  | 2010-12-30 |
| QG537  | QG536  | 37.7679   | -122.4415  | M. Rockman  | 2010-12-30 |
| QG538  | QG536  | 37.7679   | -122.4415  | M. Rockman  | 2010-12-30 |
| QG556  | QG556  | 34.421629 | -119.70202 | A. Paaby    | 2011-06-27 |
| QG557  | QG557  | 34.421629 | -119.70202 | A. Paaby    | 2011-06-27 |
| QG558  | QG556  | 34.421629 | -119.70202 | A. Paaby    | 2011-06-27 |
| QW947  | QW947  | -33.4213  | -70.6106   | M. Alkema   | 2013-04-12 |
| QX1211 | QX1211 | 37.7502   | -122.4331  | M. Rockman  | 2007-11-26 |
| QX1212 | QX1212 | 37.7502   | -122.4331  | M. Rockman  | 2007-11-26 |
| QX1213 | QX1212 | 37.7502   | -122.4331  | M. Rockman  | 2007-11-26 |
| QX1214 | QX1212 | 37.7502   | -122.4331  | M. Rockman  | 2007-11-26 |
| QX1215 | QX1211 | 37.7502   | -122.4331  | M. Rockman  | 2007-11-26 |
| QX1216 | QX1211 | 37.7502   | -122.4331  | M. Rockman  | 2007-11-26 |
| QX1233 | QX1233 | 37.8804   | -122.2838  | M. Rockman  | 2007-11-24 |
| QX1791 | QX1791 | 20.6344   | -156.3935  | E. Andersen | 2011-01-27 |
| QX1792 | QX1792 | 20.70554  | -156.35475 | E. Andersen | 2011-01-28 |
| QX1793 | QX1793 | 20.70559  | -156.35678 | E. Andersen | 2011-01-28 |
| QX1794 | QX1794 | 20.70559  | -156.35678 | E. Andersen | 2011-01-28 |
| RC301  | RC301  | 47.99     | 7.84       | R. Cassada  | 1983       |
| WN2001 | WN2001 | 51.954422 | 6.303406   | J. Riksen   | 2008-06-26 |
| WN2002 | WN2002 | 51.975285 | 5.694834   | J. Riksen   | 2007-11-20 |
| WN2010 | WN2001 | 51.954422 | 6.303406   | J. Riksen   | 2008-06-26 |
| WN2011 | WN2001 | 51.954422 | 6.303406   | J. Riksen   | 2008-06-26 |
| WN2013 | WN2001 | 51.954422 | 6.303406   | J. Riksen   | 2008-06-26 |
| WN2014 | WN2001 | 51.954422 | 6.303406   | J. Riksen   | 2008-06-26 |
| WN2016 | WN2001 | 51.954422 | 6.303406   | J. Riksen   | 2008-06-26 |
| WN2017 | WN2001 | 51.954422 | 6.303406   | J. Riksen   | 2008-06-26 |
| WN2018 | WN2001 | 51.954422 | 6.303406   | J. Riksen   | 2008-06-26 |
| WN2019 | WN2001 | 51.954422 | 6.303406   | J. Riksen   | 2008-06-26 |
| WN2020 | WN2001 | 51.954422 | 6.303406   | J. Riksen   | 2008-06-26 |
| WN2021 | WN2001 | 51.954422 | 6.303406   | J. Riksen   | 2008-06-26 |
| WN2033 | WN2033 | 51.975    | 5.694      | J. Riksen   | 2014-11-05 |
| WN2035 | WN2033 | 51.975    | 5.694      | J. Riksen   | 2014-11-05 |

|        |        |           |            |             |            |
|--------|--------|-----------|------------|-------------|------------|
| WN2039 | WN2033 | 51.975    | 5.694      | J. Riksen   | 2014-11-05 |
| WN2050 | WN2050 | 51.975    | 5.717      | J. Riksen   | 2014-11-11 |
| WN2056 | WN2050 | 51.975    | 5.717      | J. Riksen   | 2014-11-11 |
| WN2059 | WN2066 | 51.975306 | 5.694904   | M. Sterken  | 2016-10-11 |
| WN2060 | WN2066 | 51.975306 | 5.694904   | M. Sterken  | 2016-10-11 |
| WN2062 | WN2050 | 51.975196 | 5.718727   | M. Sterken  | 2016-10-11 |
| WN2063 | WN2063 | 51.974975 | 5.651316   | M. Gultom   | 2016-10-11 |
| WN2064 | WN2064 | 51.974703 | 5.68639    | M. van Wijk | 2016-10-11 |
| WN2065 | WN2066 | 51.975306 | 5.694904   | Y. Huang    | 2016-10-11 |
| WN2066 | WN2066 | 51.975306 | 5.694904   | Y. Huang    | 2016-10-11 |
| XZ1513 | XZ1513 | 22.14787  | -159.63105 | M. Ailion   | 2014-10-08 |
| XZ1514 | XZ1514 | 22.149    | -159.668   | M. Ailion   | 2014-10-15 |
| XZ1515 | XZ1515 | 22.149    | -159.668   | M. Ailion   | 2014-10-15 |
| XZ1516 | XZ1516 | 22.149    | -159.668   | M. Ailion   | 2014-10-15 |
| XZ1672 | XZ1672 | 47.687741 | -122.30051 | B. Coleman  | 2015-08-01 |
| XZ1734 | XZ1734 | -23.5     | -46.7      | M. Ailion   | 2015-11-15 |
| XZ1735 | XZ1735 | -22.9     | -46.7      | M. Ailion   | 2015-11-07 |
| XZ1756 | XZ1756 | 47.623232 | -122.30732 | P. Lamelza  | 2015-10-24 |
| XZ2018 | XZ2018 | NA        |            | M. Ailion   | 2016-10-01 |
| XZ2019 | XZ2019 | 47.636483 | -122.30589 | M. Ailion   | 2016-10-25 |
| XZ2020 | XZ2020 | 46.3      | -120       | A. Nassar   | 2016-10-01 |

**Supplementary Table 2 | Distances among wild strains that belong to the same isotype**

The geographic information of 14 isotypes that were sampled multiple times from locations at least 50 km apart is shown.

| Strain   | Isotype | Latitude   | Longitude  | Isotype strain counts | Is reference | Distance to reference strain (km) |
|----------|---------|------------|------------|-----------------------|--------------|-----------------------------------|
| AB4      | ECA251  | -34.93     | 138.59     | 2                     | FALSE        | 13170.5973987643                  |
| ECA251   | ECA251  | 34.1       | -118.1     | 2                     | TRUE         | NA                                |
| JU1200   | JU1200  | 55.577     | -4.6       | 2                     | TRUE         | NA                                |
| JU2860   | JU1200  | 52.19842   | 0.115365   | 2                     | FALSE        | 487.152613837801                  |
| JU1440   | JU1440  | 41.41307   | 2.15231    | 2                     | TRUE         | NA                                |
| JU3133   | JU1440  | 48.7015    | 2.1725     | 2                     | FALSE        | 809.98596260867                   |
| JU1793   | JU1793  | 49.12604   | 1.95114    | 2                     | TRUE         | NA                                |
| JU2139   | JU1793  | 46.63278   | 1.064289   | 2                     | FALSE        | 285.040917449512                  |
| JU311    | JU311   | 44.42      | 4.4        | 2                     | TRUE         | NA                                |
| MY2481   | JU311   | 54.346355  | 10.117737  | 2                     | FALSE        | 1178.49124674857                  |
| JU3227   | JU3228  | -38.64844  | 176.08947  | 2                     | FALSE        | 52.767605399004                   |
| JU3228   | JU3228  | -39.02256  | 175.71458  | 2                     | TRUE         | NA                                |
| JU3131   | JU323   | 48.7015    | 2.1725     | 2                     | FALSE        | 505.599584406246                  |
| JU323    | JU323   | 44.42      | 4.4        | 2                     | TRUE         | NA                                |
| JU2527   | JU792   | 47.8797    | -3.5999    | 3                     | FALSE        | 613.897518387652                  |
| JU3142   | JU792   | 48.71      | -3.81      | 3                     | FALSE        | 702.031724447556                  |
| JU792    | JU792   | 43.06      | 0.24       | 3                     | TRUE         | NA                                |
| BRC20231 | MY23    | 23.541517  | 120.908112 | 2                     | FALSE        | 9447.77982000758                  |
| MY23     | MY23    | 51.96      | 7.53       | 2                     | TRUE         | NA                                |
| JU3136   | MY2453  | 48.7015    | 2.1725     | 3                     | FALSE        | 525.612240370477                  |
| MY2453   | MY2453  | 51.950777  | 7.536628   | 3                     | TRUE         | NA                                |
| MY2622   | MY2453  | 54.3491    | 10.11505   | 3                     | FALSE        | 317.753858523063                  |
| MY2532   | MY2535  | 54.346355  | 10.117737  | 3                     | FALSE        | 315.352444531987                  |
| MY2535   | MY2535  | 51.950723  | 7.599099   | 3                     | TRUE         | NA                                |
| NIC508   | MY2535  | 40.86183   | 14.261756  | 3                     | FALSE        | 1333.4739542811                   |
| ECA552   | MY2573  | 43.8658    | 5.0628     | 4                     | FALSE        | 918.573851024173                  |
| MY2208   | MY2573  | 54.346355  | 10.117737  | 4                     | FALSE        | 315.352444531987                  |
| MY2573   | MY2573  | 51.950723  | 7.599099   | 4                     | TRUE         | NA                                |
| NIC1604  | MY2573  | 38.596     | -0.0859    | 4                     | FALSE        | 1599.85744272238                  |
| NIC195   | NIC195  | 38.545874  | -28.37322  | 2                     | TRUE         | NA                                |
| NIC198   | NIC195  | 39.4364016 | -31.23849  | 2                     | FALSE        | 267.18451568098                   |
| MY2024   | RC301   | 54.346355  | 10.117737  | 2                     | FALSE        | 724.773320793207                  |
| RC301    | RC301   | 47.99      | 7.84       | 2                     | TRUE         | NA                                |

### Supplementary Table 3 | Distribution of swept haplotype and hyper-divergent genome across wild *C. elegans* isotypes

The variant distribution for the 328 *C. elegans* isotypes is shown. The geographic origin of the isotype is shown in the second column. The fraction swept columns refer to the fraction of chromosomes I, IV, V, and X that each strain shares with the most abundant haplotype (Methods). The hyper-divergent genome column refers to the amount of genome (kb) that was classified as hyper-divergent and the fraction hyper-divergent fraction column is the fraction of the genome that is classified as hyper-divergent. The genome-wide variants column represents the total number of ALT variant calls for each isotype, and the divergent-region variants column shows the number of variants localized to hyper-divergent regions. Finally, the fraction divergent-region variants column shows the fraction of total variants that are localized to the hyper-divergent regions.

| Isotype reference strain | Origin     | Fraction swept (I, IV, V, X) |       |       |       | Hyper-divergent genome (kb) | Fraction hyper-divergent | Genome-wide variants | Divergent-region variants | Fraction divergent-region variants |
|--------------------------|------------|------------------------------|-------|-------|-------|-----------------------------|--------------------------|----------------------|---------------------------|------------------------------------|
|                          |            |                              |       |       |       |                             |                          |                      |                           |                                    |
| AB1                      | Australia  | 0.695                        | 0.601 | 0.805 | 0.761 | 1162                        | 0.012                    | 92517                | 23363                     | 0.253                              |
| BRC20067                 | Asia       | 0.300                        | 1.000 | 0.904 | 1.000 | 826                         | 0.008                    | 89685                | 10905                     | 0.122                              |
| BRC20263                 | Australia  | 0.323                        | 0.735 | 0.367 | 0.690 | 2000                        | 0.020                    | 153922               | 39114                     | 0.254                              |
| CB4852                   | Unknown    | 0.817                        | 0.904 | 0.904 | 0.588 | 528                         | 0.005                    | 67966                | 10002                     | 0.147                              |
| CB4854                   | N. America | 0.407                        | 0.853 | 0.903 | 0.653 | 980                         | 0.010                    | 98343                | 14154                     | 0.144                              |
| CB4856                   | Hawaii     | 0.000                        | 0.000 | 0.000 | 0.000 | 3224                        | 0.032                    | 242577               | 58514                     | 0.241                              |
| CB4932                   | Europe     | 0.262                        | 0.000 | 0.768 | 0.058 | 710                         | 0.007                    | 88756                | 13888                     | 0.156                              |
| CX11254                  | N. America | 0.000                        | 0.870 | 0.313 | 0.272 | 2001                        | 0.020                    | 136736               | 35033                     | 0.256                              |
| CX11262                  | N. America | 0.000                        | 0.655 | 0.263 | 0.170 | 2137                        | 0.021                    | 165389               | 41765                     | 0.253                              |
| CX11264                  | N. America | 0.237                        | 0.561 | 0.234 | 0.000 | 2112                        | 0.021                    | 177791               | 43398                     | 0.244                              |
| CX11271                  | N. America | 0.237                        | 0.565 | 0.792 | 0.306 | 667                         | 0.007                    | 109851               | 12986                     | 0.118                              |
| CX11276                  | N. America | 0.646                        | 0.742 | 0.717 | 0.327 | 1804                        | 0.018                    | 117544               | 26202                     | 0.223                              |
| CX11285                  | N. America | 0.096                        | 0.555 | 0.129 | 0.361 | 2173                        | 0.022                    | 169882               | 35749                     | 0.210                              |
| CX11292                  | N. America | 0.318                        | 0.743 | 0.904 | 0.306 | 682                         | 0.007                    | 97849                | 12768                     | 0.130                              |
| CX11307                  | N. America | 0.222                        | 0.973 | 0.241 | 0.217 | 2026                        | 0.020                    | 149073               | 43265                     | 0.290                              |
| CX11314                  | N. America | 0.311                        | 0.740 | 0.282 | 0.306 | 2139                        | 0.021                    | 147343               | 38304                     | 0.260                              |
| CX11315                  | N. America | 0.096                        | 0.561 | 0.663 | 0.553 | 2121                        | 0.021                    | 134796               | 37884                     | 0.281                              |
| DL200                    | Africa     | 0.693                        | 0.759 | 0.682 | 0.000 | 1258                        | 0.013                    | 123175               | 17745                     | 0.144                              |
| DL226                    | N. America | 0.187                        | 0.768 | 0.805 | 0.618 | 2039                        | 0.020                    | 143436               | 32910                     | 0.229                              |
| DL238                    | Hawaii     | 0.000                        | 0.000 | 0.000 | 0.000 | 3206                        | 0.032                    | 260360               | 69449                     | 0.267                              |
| ECA189                   | Hawaii     | 0.000                        | 0.000 | 0.000 | 0.000 | 2987                        | 0.030                    | 231297               | 58893                     | 0.255                              |
| ECA191                   | Hawaii     | 0.000                        | 0.000 | 0.000 | 0.000 | 3856                        | 0.038                    | 426268               | 80204                     | 0.188                              |
| ECA243                   | Europe     | 0.292                        | 0.000 | 0.640 | 0.134 | 510                         | 0.005                    | 61864                | 13801                     | 0.223                              |
| ECA246                   | N. America | 0.631                        | 0.765 | 0.904 | 0.500 | 1387                        | 0.014                    | 108790               | 19480                     | 0.179                              |
| ECA248                   | N. America | 0.237                        | 0.381 | 0.655 | 0.222 | 1379                        | 0.014                    | 130786               | 21273                     | 0.163                              |
| ECA250                   | N. America | 0.177                        | 0.743 | 0.902 | 0.139 | 1516                        | 0.015                    | 102241               | 17874                     | 0.175                              |
| ECA251                   | N. America | 0.318                        | 0.743 | 0.904 | 0.306 | 1339                        | 0.013                    | 112507               | 19243                     | 0.171                              |

|        |             |       |       |       |       |      |       |        |        |       |
|--------|-------------|-------|-------|-------|-------|------|-------|--------|--------|-------|
| ECA259 | Unknown     | 0.096 | 0.743 | 0.106 | 0.092 | 1739 | 0.017 | 159112 | 33239  | 0.209 |
| ECA347 | Hawaii      | 0.000 | 0.000 | 0.000 | 0.000 | 4592 | 0.046 | 463961 | 99679  | 0.215 |
| ECA348 | N. America  | 0.081 | 0.432 | 0.127 | 0.000 | 2417 | 0.024 | 202138 | 49636  | 0.246 |
| ECA349 | N. America  | 0.318 | 0.593 | 0.682 | 0.136 | 1589 | 0.016 | 138595 | 27144  | 0.196 |
| ECA36  | New Zealand | 0.000 | 0.000 | 0.000 | 0.000 | 5262 | 0.052 | 483212 | 123370 | 0.255 |
| ECA363 | Hawaii      | 0.000 | 0.000 | 0.000 | 0.000 | 4813 | 0.048 | 459879 | 105428 | 0.229 |
| ECA369 | Hawaii      | 0.000 | 0.000 | 0.000 | 0.000 | 7670 | 0.076 | 386353 | 194678 | 0.504 |
| ECA372 | Hawaii      | 0.000 | 0.000 | 0.000 | 0.000 | 2925 | 0.029 | 219397 | 53775  | 0.245 |
| ECA396 | Hawaii      | 0.000 | 0.000 | 0.000 | 0.000 | 4138 | 0.041 | 445019 | 89316  | 0.201 |
| ECA592 | N. America  | 0.000 | 0.000 | 0.286 | 0.171 | 2007 | 0.020 | 194179 | 36248  | 0.187 |
| ECA593 | N. America  | 0.000 | 0.163 | 0.000 | 0.000 | 2723 | 0.027 | 238820 | 51048  | 0.214 |
| ECA594 | N. America  | 0.154 | 0.102 | 0.097 | 0.329 | 2504 | 0.025 | 207667 | 48082  | 0.232 |
| ECA640 | N. America  | 0.279 | 0.443 | 0.079 | 0.524 | 1857 | 0.019 | 168016 | 43341  | 0.258 |
| ECA701 | Hawaii      | 0.000 | 0.000 | 0.000 | 0.000 | 9903 | 0.099 | 580298 | 258199 | 0.445 |
| ECA703 | Hawaii      | 0.000 | 0.000 | 0.000 | 0.000 | 2809 | 0.028 | 257175 | 53718  | 0.209 |
| ECA705 | Hawaii      | 0.000 | 0.000 | 0.000 | 0.000 | 3070 | 0.031 | 235110 | 55849  | 0.238 |
| ECA706 | Hawaii      | 0.000 | 0.000 | 0.000 | 0.000 | 2441 | 0.024 | 243854 | 51853  | 0.213 |
| ECA710 | Hawaii      | 0.000 | 0.000 | 0.000 | 0.000 | 2485 | 0.025 | 226762 | 50729  | 0.224 |
| ECA712 | Hawaii      | 0.000 | 0.000 | 0.000 | 0.000 | 2884 | 0.029 | 225399 | 50786  | 0.225 |
| ECA722 | Hawaii      | 0.000 | 0.000 | 0.000 | 0.000 | 3615 | 0.036 | 444068 | 79778  | 0.180 |
| ECA723 | Hawaii      | 0.000 | 0.000 | 0.000 | 0.000 | 3366 | 0.034 | 431904 | 72976  | 0.169 |
| ECA724 | Hawaii      | 0.000 | 0.000 | 0.000 | 0.000 | 4326 | 0.043 | 437044 | 91298  | 0.209 |
| ECA730 | Hawaii      | 0.000 | 0.000 | 0.000 | 0.000 | 2966 | 0.030 | 420411 | 63875  | 0.152 |
| ECA732 | Hawaii      | 0.000 | 0.000 | 0.000 | 0.000 | 3017 | 0.030 | 256960 | 66813  | 0.260 |
| ECA733 | Hawaii      | 0.000 | 0.000 | 0.000 | 0.000 | 3001 | 0.030 | 250557 | 62046  | 0.248 |
| ECA738 | Hawaii      | 0.000 | 0.000 | 0.000 | 0.000 | 2422 | 0.024 | 227308 | 48817  | 0.215 |
| ECA740 | Hawaii      | 0.000 | 0.000 | 0.000 | 0.000 | 4939 | 0.049 | 486776 | 119954 | 0.246 |
| ECA741 | Hawaii      | 0.000 | 0.000 | 0.000 | 0.000 | 4907 | 0.049 | 480385 | 110565 | 0.230 |
| ECA742 | Hawaii      | 0.000 | 0.000 | 0.000 | 0.000 | 5538 | 0.055 | 498928 | 133335 | 0.267 |
| ECA743 | Hawaii      | 0.000 | 0.000 | 0.121 | 0.000 | 2373 | 0.024 | 225101 | 48674  | 0.216 |
| ECA744 | Hawaii      | 0.000 | 0.000 | 0.000 | 0.000 | 3377 | 0.034 | 426617 | 73389  | 0.172 |
| ECA745 | Hawaii      | 0.000 | 0.000 | 0.000 | 0.000 | 3776 | 0.038 | 440983 | 83326  | 0.189 |
| ECA746 | Hawaii      | 0.000 | 0.000 | 0.000 | 0.000 | 3446 | 0.034 | 434102 | 77631  | 0.179 |
| ECA760 | Hawaii      | 0.000 | 0.000 | 0.000 | 0.000 | 2124 | 0.021 | 226120 | 44842  | 0.198 |
| ECA768 | Hawaii      | 0.000 | 0.000 | 0.000 | 0.000 | 2391 | 0.024 | 236885 | 51418  | 0.217 |
| ECA777 | Hawaii      | 0.000 | 0.000 | 0.000 | 0.000 | 2030 | 0.020 | 225133 | 43788  | 0.194 |
| ECA778 | Hawaii      | 0.000 | 0.000 | 0.000 | 0.000 | 2287 | 0.023 | 223197 | 48527  | 0.217 |



|         |            |       |       |       |       |      |       |        |       |       |
|---------|------------|-------|-------|-------|-------|------|-------|--------|-------|-------|
| ECA807  | Hawaii     | 0.000 | 0.000 | 0.000 | 0.000 | 2737 | 0.027 | 241101 | 47559 | 0.197 |
| ECA812  | Hawaii     | 0.000 | 0.000 | 0.000 | 0.000 | 2753 | 0.027 | 226067 | 48104 | 0.213 |
| ECA923  | Hawaii     | 0.073 | 0.657 | 0.536 | 0.170 | 2563 | 0.026 | 166996 | 42958 | 0.257 |
| ECA928  | Hawaii     | 0.073 | 0.434 | 0.204 | 0.000 | 2360 | 0.024 | 188816 | 43662 | 0.231 |
| ECA930  | Asia       | 0.237 | 0.562 | 0.770 | 0.170 | 1970 | 0.020 | 132581 | 30552 | 0.230 |
| ED3005  | Europe     | 0.351 | 0.562 | 0.770 | 0.170 | 2060 | 0.021 | 137514 | 32800 | 0.239 |
| ED3011  | Europe     | 0.318 | 0.443 | 0.901 | 0.611 | 2088 | 0.021 | 113708 | 24193 | 0.213 |
| ED3012  | Europe     | 0.292 | 0.803 | 0.904 | 0.616 | 841  | 0.008 | 47914  | 13894 | 0.290 |
| ED3017  | Europe     | 0.749 | 0.825 | 0.710 | 0.485 | 1147 | 0.011 | 115601 | 20291 | 0.176 |
| ED3040  | Africa     | 0.073 | 0.645 | 0.674 | 0.756 | 998  | 0.010 | 121638 | 14838 | 0.122 |
| ED3046  | Africa     | 0.206 | 0.153 | 0.465 | 0.256 | 2045 | 0.020 | 152355 | 34163 | 0.224 |
| ED3048  | Africa     | 0.874 | 0.882 | 0.901 | 0.992 | 875  | 0.009 | 91113  | 13063 | 0.143 |
| ED3049  | Africa     | 0.206 | 0.153 | 0.465 | 0.256 | 2049 | 0.020 | 152132 | 34228 | 0.225 |
| ED3052  | Africa     | 0.900 | 0.228 | 0.763 | 0.500 | 1035 | 0.010 | 119790 | 19286 | 0.161 |
| ED3073  | Africa     | 0.384 | 1.000 | 0.811 | 0.871 | 1029 | 0.010 | 115599 | 15888 | 0.137 |
| ED3077  | Africa     | 0.900 | 1.000 | 0.588 | 0.992 | 1500 | 0.015 | 130076 | 25604 | 0.197 |
| EG4347  | N. America | 0.197 | 0.765 | 0.904 | 0.471 | 650  | 0.006 | 48038  | 8338  | 0.174 |
| EG4349  | N. America | 0.410 | 0.072 | 0.394 | 0.611 | 1946 | 0.019 | 172747 | 37824 | 0.219 |
| EG4724  | Europe     | 0.703 | 0.292 | 0.342 | 0.508 | 1900 | 0.019 | 163976 | 36931 | 0.225 |
| EG4725  | Europe     | 0.277 | 0.164 | 0.218 | 0.421 | 3000 | 0.030 | 206758 | 61174 | 0.296 |
| EG4946  | N. America | 0.368 | 0.797 | 0.904 | 0.530 | 1178 | 0.012 | 89578  | 18468 | 0.206 |
| GXW1    | Asia       | 0.287 | 0.532 | 0.953 | 0.727 | 960  | 0.010 | 118217 | 19965 | 0.169 |
| JT11398 | N. America | 0.193 | 0.738 | 0.868 | 0.489 | 566  | 0.006 | 85909  | 9837  | 0.115 |
| JU1088  | Asia       | 0.302 | 1.000 | 0.904 | 0.959 | 1961 | 0.020 | 105264 | 28900 | 0.275 |
| JU1172  | S. America | 0.318 | 0.743 | 0.872 | 0.306 | 1342 | 0.013 | 112780 | 20476 | 0.182 |
| JU1200  | Europe     | 0.292 | 0.863 | 0.904 | 0.710 | 61   | 0.001 | 21836  | 1155  | 0.053 |
| JU1212  | Europe     | 0.098 | 0.000 | 0.438 | 0.134 | 1735 | 0.017 | 102086 | 31593 | 0.309 |
| JU1213  | Europe     | 0.621 | 0.000 | 0.431 | 0.192 | 1896 | 0.019 | 134478 | 30788 | 0.229 |
| JU1242  | Europe     | 0.532 | 0.604 | 0.740 | 0.000 | 892  | 0.009 | 117997 | 15018 | 0.127 |
| JU1246  | Europe     | 0.194 | 0.000 | 0.644 | 0.117 | 1157 | 0.012 | 121086 | 19486 | 0.161 |
| JU1249  | Europe     | 0.382 | 0.897 | 0.904 | 0.134 | 429  | 0.004 | 33832  | 8988  | 0.266 |
| JU1395  | Europe     | 0.823 | 0.811 | 0.904 | 0.588 | 615  | 0.006 | 66203  | 9305  | 0.141 |
| JU1400  | Europe     | 0.229 | 0.825 | 0.538 | 0.186 | 2282 | 0.023 | 175806 | 49100 | 0.279 |
| JU1409  | Europe     | 0.413 | 0.461 | 0.868 | 0.545 | 810  | 0.008 | 105797 | 13291 | 0.126 |
| JU1440  | Europe     | 0.629 | 0.538 | 0.800 | 0.667 | 1113 | 0.011 | 98731  | 21867 | 0.221 |
| JU1491  | Europe     | 0.590 | 0.000 | 0.701 | 0.400 | 1285 | 0.013 | 137678 | 26518 | 0.193 |
| JU1530  | Europe     | 0.402 | 0.885 | 0.774 | 0.202 | 780  | 0.008 | 108829 | 13397 | 0.123 |

|        |            |       |       |       |       |      |       |        |       |       |
|--------|------------|-------|-------|-------|-------|------|-------|--------|-------|-------|
| JU1543 | Europe     | 0.808 | 0.729 | 0.822 | 0.749 | 269  | 0.003 | 38858  | 6847  | 0.176 |
| JU1568 | Europe     | 0.292 | 0.526 | 0.820 | 0.297 | 128  | 0.001 | 34873  | 1569  | 0.045 |
| JU1580 | Europe     | 0.531 | 0.000 | 0.000 | 0.000 | 2548 | 0.025 | 209856 | 56063 | 0.267 |
| JU1581 | Europe     | 0.000 | 0.000 | 0.768 | 0.000 | 1052 | 0.010 | 148575 | 21400 | 0.144 |
| JU1586 | Europe     | 0.292 | 0.653 | 0.816 | 0.562 | 384  | 0.004 | 42094  | 7876  | 0.187 |
| JU1652 | S. America | 0.692 | 0.121 | 0.718 | 0.936 | 1848 | 0.018 | 121191 | 28738 | 0.237 |
| JU1666 | Europe     | 0.627 | 0.000 | 0.652 | 0.000 | 1471 | 0.015 | 145236 | 23121 | 0.159 |
| JU1792 | Europe     | 0.292 | 0.536 | 0.756 | 0.058 | 812  | 0.008 | 83277  | 16110 | 0.193 |
| JU1793 | Europe     | 0.535 | 0.000 | 0.000 | 0.000 | 2749 | 0.027 | 206545 | 57040 | 0.276 |
| JU1808 | Europe     | 0.278 | 0.443 | 0.808 | 0.149 | 984  | 0.010 | 111766 | 16386 | 0.147 |
| JU1896 | Europe     | 0.000 | 0.000 | 0.868 | 0.791 | 1458 | 0.015 | 117869 | 25535 | 0.217 |
| JU1934 | Europe     | 0.506 | 0.000 | 0.740 | 0.058 | 1010 | 0.010 | 121568 | 18708 | 0.154 |
| JU2001 | Africa     | 0.516 | 0.000 | 0.473 | 0.000 | 2121 | 0.021 | 187815 | 43047 | 0.229 |
| JU2007 | Europe     | 0.264 | 0.656 | 0.622 | 0.638 | 955  | 0.010 | 123027 | 19470 | 0.158 |
| JU2016 | N. America | 0.318 | 0.743 | 0.904 | 0.306 | 1220 | 0.012 | 105254 | 17098 | 0.162 |
| JU2017 | N. America | 0.215 | 0.306 | 0.682 | 0.516 | 1597 | 0.016 | 151825 | 27993 | 0.184 |
| JU2106 | Europe     | 0.506 | 0.000 | 0.000 | 0.000 | 1973 | 0.020 | 165575 | 41744 | 0.252 |
| JU2131 | Europe     | 0.627 | 0.000 | 0.600 | 0.000 | 1470 | 0.015 | 149803 | 24404 | 0.163 |
| JU2141 | Europe     | 0.506 | 0.000 | 0.740 | 0.058 | 894  | 0.009 | 120359 | 15366 | 0.128 |
| JU2234 | Europe     | 0.435 | 0.063 | 0.768 | 0.807 | 991  | 0.010 | 116614 | 20118 | 0.173 |
| JU2250 | Europe     | 0.497 | 0.000 | 0.692 | 0.000 | 824  | 0.008 | 136220 | 15054 | 0.111 |
| JU2257 | Europe     | 0.292 | 0.093 | 0.771 | 0.134 | 262  | 0.003 | 47142  | 6514  | 0.138 |
| JU2316 | Europe     | 0.263 | 0.000 | 0.058 | 0.278 | 3271 | 0.033 | 257407 | 68021 | 0.264 |
| JU2464 | S. America | 0.775 | 0.563 | 0.904 | 0.488 | 1623 | 0.016 | 122126 | 22039 | 0.180 |
| JU2466 | S. America | 0.814 | 0.994 | 0.900 | 1.000 | 673  | 0.007 | 94560  | 10939 | 0.116 |
| JU2478 | Europe     | 0.341 | 0.735 | 0.904 | 0.214 | 717  | 0.007 | 106652 | 11520 | 0.108 |
| JU2513 | Europe     | 0.784 | 0.911 | 0.825 | 0.691 | 1605 | 0.016 | 116827 | 27635 | 0.237 |
| JU2519 | Europe     | 0.433 | 0.199 | 0.058 | 0.000 | 2628 | 0.026 | 207698 | 49843 | 0.240 |
| JU2522 | Europe     | 0.312 | 0.234 | 0.354 | 0.424 | 1639 | 0.016 | 154808 | 30249 | 0.195 |
| JU2526 | Europe     | 0.219 | 0.069 | 0.058 | 0.000 | 3793 | 0.038 | 269650 | 72579 | 0.269 |
| JU2534 | Europe     | 0.657 | 0.944 | 0.867 | 0.075 | 836  | 0.008 | 89081  | 12105 | 0.136 |
| JU2565 | Europe     | 0.679 | 0.000 | 0.820 | 0.134 | 130  | 0.001 | 41682  | 1578  | 0.038 |
| JU2566 | Europe     | 0.292 | 0.488 | 0.708 | 0.058 | 359  | 0.004 | 57003  | 8235  | 0.144 |
| JU2570 | Europe     | 0.614 | 0.000 | 0.740 | 0.000 | 913  | 0.009 | 135159 | 16090 | 0.119 |
| JU2572 | Europe     | 0.303 | 0.825 | 0.792 | 0.058 | 1036 | 0.010 | 79883  | 22719 | 0.284 |
| JU2575 | Europe     | 0.292 | 0.824 | 0.723 | 0.076 | 489  | 0.005 | 59024  | 7854  | 0.133 |
| JU2576 | Europe     | 0.000 | 0.000 | 0.762 | 0.166 | 1350 | 0.013 | 142266 | 22027 | 0.155 |

|        |             |       |       |       |       |      |       |        |       |       |
|--------|-------------|-------|-------|-------|-------|------|-------|--------|-------|-------|
| JU2578 | Europe      | 0.176 | 0.760 | 0.868 | 0.812 | 974  | 0.010 | 118552 | 17081 | 0.144 |
| JU258  | Atlantic    | 0.000 | 0.000 | 0.274 | 0.000 | 3509 | 0.035 | 206928 | 54206 | 0.262 |
| JU2581 | Europe      | 0.141 | 0.184 | 0.482 | 0.464 | 1561 | 0.016 | 144025 | 24825 | 0.172 |
| JU2586 | Europe      | 0.000 | 0.462 | 0.342 | 0.545 | 1898 | 0.019 | 169120 | 33087 | 0.196 |
| JU2587 | Europe      | 0.610 | 0.239 | 0.666 | 0.605 | 2162 | 0.022 | 153502 | 39383 | 0.257 |
| JU2592 | Europe      | 0.292 | 0.397 | 0.564 | 0.058 | 1455 | 0.015 | 98664  | 23338 | 0.237 |
| JU2593 | Europe      | 0.305 | 0.068 | 0.758 | 0.354 | 1859 | 0.019 | 154999 | 30011 | 0.194 |
| JU2600 | Europe      | 0.611 | 0.000 | 0.703 | 0.000 | 1479 | 0.015 | 139840 | 29012 | 0.207 |
| JU2610 | Europe      | 0.567 | 0.000 | 0.703 | 0.000 | 1716 | 0.017 | 141986 | 30897 | 0.218 |
| JU2619 | N. America  | 0.073 | 1.000 | 0.710 | 0.592 | 1904 | 0.019 | 139960 | 31258 | 0.223 |
| JU2800 | Europe      | 0.452 | 0.000 | 0.902 | 0.149 | 1323 | 0.013 | 133149 | 21096 | 0.158 |
| JU2811 | Australia   | 0.319 | 0.000 | 0.379 | 0.705 | 2177 | 0.022 | 182212 | 43729 | 0.240 |
| JU2825 | Europe      | 0.292 | 0.000 | 0.613 | 0.134 | 1037 | 0.010 | 86020  | 25271 | 0.294 |
| JU2829 | Europe      | 0.251 | 0.624 | 0.482 | 0.495 | 1495 | 0.015 | 153621 | 26792 | 0.174 |
| JU2838 | N. America  | 0.376 | 0.627 | 0.219 | 0.131 | 1709 | 0.017 | 159833 | 33717 | 0.211 |
| JU2841 | New Zealand | 0.129 | 0.504 | 0.730 | 0.546 | 1639 | 0.016 | 146135 | 30703 | 0.210 |
| JU2853 | Europe      | 0.303 | 0.874 | 0.820 | 0.692 | 338  | 0.003 | 68256  | 4556  | 0.067 |
| JU2862 | Europe      | 0.373 | 0.639 | 0.868 | 0.145 | 870  | 0.009 | 112976 | 12541 | 0.111 |
| JU2866 | N. America  | 0.161 | 0.706 | 0.772 | 0.160 | 1556 | 0.016 | 135682 | 29032 | 0.214 |
| JU2878 | N. America  | 0.426 | 0.753 | 0.660 | 0.819 | 1743 | 0.017 | 150327 | 34140 | 0.227 |
| JU2879 | N. America  | 0.000 | 0.557 | 0.332 | 0.167 | 2313 | 0.023 | 188605 | 49937 | 0.265 |
| JU2906 | Europe      | 0.403 | 0.858 | 0.853 | 0.464 | 694  | 0.007 | 78203  | 10326 | 0.132 |
| JU2907 | Europe      | 0.151 | 0.939 | 0.853 | 0.669 | 444  | 0.004 | 40348  | 5445  | 0.135 |
| JU310  | Europe      | 0.495 | 0.885 | 0.774 | 0.202 | 827  | 0.008 | 110575 | 14902 | 0.135 |
| JU311  | Europe      | 0.292 | 0.000 | 0.866 | 0.149 | 1176 | 0.012 | 84376  | 14319 | 0.170 |
| JU3125 | Europe      | 0.605 | 0.737 | 0.458 | 0.632 | 1335 | 0.013 | 117986 | 25564 | 0.217 |
| JU3127 | Europe      | 0.603 | 0.635 | 0.458 | 0.436 | 1387 | 0.014 | 124637 | 25540 | 0.205 |
| JU3128 | Europe      | 0.376 | 0.778 | 0.853 | 0.276 | 702  | 0.007 | 93411  | 10329 | 0.111 |
| JU3132 | Europe      | 0.402 | 0.000 | 0.712 | 0.066 | 999  | 0.010 | 134611 | 15550 | 0.116 |
| JU3134 | Europe      | 0.151 | 0.309 | 0.868 | 0.902 | 1727 | 0.017 | 119861 | 27718 | 0.231 |
| JU3135 | Europe      | 0.092 | 0.950 | 0.904 | 0.873 | 1240 | 0.012 | 104695 | 21465 | 0.205 |
| JU3137 | Europe      | 0.482 | 0.000 | 0.768 | 0.701 | 1239 | 0.012 | 135633 | 22552 | 0.166 |
| JU3140 | Europe      | 0.614 | 0.000 | 0.685 | 0.000 | 1130 | 0.011 | 144483 | 17782 | 0.123 |
| JU3141 | Europe      | 0.292 | 0.000 | 0.756 | 0.058 | 772  | 0.008 | 96197  | 15055 | 0.157 |
| JU3144 | Africa      | 0.410 | 0.727 | 0.512 | 0.587 | 1822 | 0.018 | 148206 | 35131 | 0.237 |
| JU3166 | Atlantic    | 0.155 | 0.230 | 0.354 | 0.000 | 2466 | 0.025 | 196219 | 44301 | 0.226 |
| JU3167 | Atlantic    | 0.073 | 0.000 | 0.000 | 0.140 | 2796 | 0.028 | 233185 | 60051 | 0.258 |

|        |             |       |       |       |       |      |       |        |        |       |
|--------|-------------|-------|-------|-------|-------|------|-------|--------|--------|-------|
| JU3169 | Atlantic    | 0.073 | 0.000 | 0.403 | 0.140 | 1874 | 0.019 | 194808 | 31708  | 0.163 |
| JU3224 | New Zealand | 0.413 | 0.678 | 0.383 | 0.730 | 1999 | 0.020 | 150166 | 34389  | 0.229 |
| JU3225 | New Zealand | 0.181 | 0.679 | 0.904 | 0.678 | 1008 | 0.010 | 99429  | 17591  | 0.177 |
| JU3226 | New Zealand | 0.000 | 0.000 | 0.000 | 0.000 | 5767 | 0.058 | 451149 | 120800 | 0.268 |
| JU3228 | New Zealand | 0.328 | 0.252 | 0.590 | 0.756 | 2237 | 0.022 | 158485 | 36471  | 0.230 |
| JU323  | Europe      | 0.992 | 0.534 | 0.917 | 0.000 | 1178 | 0.012 | 113780 | 18307  | 0.161 |
| JU3280 | Europe      | 0.679 | 0.099 | 0.556 | 0.762 | 1436 | 0.014 | 137853 | 24509  | 0.178 |
| JU3282 | Europe      | 0.977 | 1.000 | 0.949 | 0.636 | 1539 | 0.015 | 116377 | 28173  | 0.242 |
| JU3291 | Europe      | 0.611 | 0.000 | 0.703 | 0.000 | 1424 | 0.014 | 139762 | 28136  | 0.201 |
| JU346  | Europe      | 0.240 | 0.336 | 0.723 | 0.199 | 982  | 0.010 | 119808 | 16370  | 0.137 |
| JU360  | Europe      | 0.305 | 0.829 | 0.717 | 0.476 | 1585 | 0.016 | 135813 | 29711  | 0.219 |
| JU367  | Europe      | 0.292 | 0.706 | 0.948 | 0.134 | 355  | 0.004 | 47201  | 4533   | 0.096 |
| JU393  | Europe      | 0.587 | 0.000 | 0.654 | 0.262 | 2038 | 0.020 | 135471 | 39470  | 0.291 |
| JU394  | Europe      | 0.292 | 0.000 | 0.640 | 0.134 | 559  | 0.006 | 59583  | 13390  | 0.225 |
| JU397  | Europe      | 0.506 | 0.000 | 0.740 | 0.000 | 1075 | 0.011 | 111079 | 16870  | 0.152 |
| JU406  | Europe      | 0.292 | 0.000 | 0.679 | 0.134 | 546  | 0.005 | 63009  | 11367  | 0.180 |
| JU440  | Europe      | 0.343 | 0.546 | 0.812 | 0.651 | 417  | 0.004 | 68622  | 8787   | 0.128 |
| JU561  | Europe      | 0.786 | 0.450 | 0.899 | 0.646 | 1171 | 0.012 | 92742  | 22392  | 0.241 |
| JU642  | Europe      | 0.073 | 0.508 | 0.853 | 0.519 | 929  | 0.009 | 117189 | 14321  | 0.122 |
| JU751  | Europe      | 0.211 | 0.284 | 0.697 | 0.366 | 2179 | 0.022 | 149286 | 35978  | 0.241 |
| JU774  | Europe      | 0.629 | 0.816 | 0.512 | 0.614 | 1911 | 0.019 | 143568 | 38573  | 0.269 |
| JU775  | Europe      | 0.302 | 0.000 | 0.150 | 0.000 | 2625 | 0.026 | 243756 | 54370  | 0.223 |
| JU778  | Europe      | 0.567 | 0.000 | 0.763 | 0.399 | 1916 | 0.019 | 143528 | 33372  | 0.233 |
| JU782  | Europe      | 0.477 | 0.000 | 0.484 | 0.259 | 2820 | 0.028 | 209429 | 61273  | 0.293 |
| JU792  | Europe      | 0.506 | 0.000 | 0.740 | 0.000 | 880  | 0.009 | 138559 | 15865  | 0.114 |
| JU830  | Europe      | 0.077 | 0.544 | 0.792 | 0.366 | 2047 | 0.020 | 124853 | 28459  | 0.228 |
| JU847  | Europe      | 0.821 | 0.126 | 0.774 | 0.111 | 1524 | 0.015 | 119085 | 24100  | 0.202 |
| KR314  | N. America  | 0.457 | 0.696 | 0.894 | 0.862 | 1983 | 0.020 | 131018 | 25048  | 0.191 |
| LKC34  | Africa      | 0.868 | 0.193 | 0.745 | 0.421 | 1248 | 0.012 | 123406 | 19662  | 0.159 |
| MY1    | Europe      | 0.216 | 0.787 | 0.785 | 0.346 | 1387 | 0.014 | 138209 | 29190  | 0.211 |
| MY10   | Europe      | 0.652 | 0.368 | 0.607 | 0.799 | 2475 | 0.025 | 174925 | 55624  | 0.318 |
| MY16   | Europe      | 0.260 | 0.000 | 0.245 | 0.000 | 2315 | 0.023 | 183670 | 49123  | 0.267 |
| MY18   | Europe      | 0.000 | 0.404 | 0.769 | 0.000 | 1640 | 0.016 | 154521 | 30222  | 0.196 |
| MY2147 | Europe      | 0.151 | 0.000 | 0.754 | 0.133 | 860  | 0.009 | 108390 | 15509  | 0.143 |
| MY2212 | Europe      | 0.391 | 0.466 | 0.852 | 0.455 | 1169 | 0.012 | 113204 | 16609  | 0.147 |

|         |            |       |       |       |       |      |       |        |       |       |
|---------|------------|-------|-------|-------|-------|------|-------|--------|-------|-------|
| MY23    | Europe     | 0.000 | 0.000 | 0.000 | 0.000 | 3822 | 0.038 | 235686 | 70646 | 0.300 |
| MY2453  | Europe     | 0.394 | 0.000 | 0.866 | 0.149 | 1280 | 0.013 | 120121 | 23257 | 0.194 |
| MY2530  | Europe     | 0.638 | 0.769 | 0.717 | 0.817 | 677  | 0.007 | 107038 | 13179 | 0.123 |
| MY2535  | Europe     | 0.316 | 0.935 | 0.853 | 0.678 | 866  | 0.009 | 91689  | 11946 | 0.130 |
| MY2573  | Europe     | 0.333 | 0.085 | 0.739 | 0.061 | 488  | 0.005 | 88791  | 5947  | 0.067 |
| MY2585  | Europe     | 0.304 | 0.929 | 0.792 | 0.821 | 1612 | 0.016 | 118229 | 27078 | 0.229 |
| MY2693  | Europe     | 0.141 | 0.727 | 0.897 | 0.755 | 1569 | 0.016 | 113210 | 27071 | 0.239 |
| MY2713  | Europe     | 0.000 | 0.985 | 0.898 | 0.755 | 1779 | 0.018 | 119161 | 30390 | 0.255 |
| MY2741  | Europe     | 0.141 | 0.523 | 0.768 | 0.370 | 2204 | 0.022 | 154168 | 40246 | 0.261 |
| MY518   | Europe     | 0.318 | 0.562 | 0.953 | 0.170 | 1567 | 0.016 | 119578 | 21311 | 0.178 |
| MY679   | Europe     | 0.395 | 0.914 | 0.805 | 0.839 | 1296 | 0.013 | 111818 | 19692 | 0.176 |
| MY772   | Europe     | 0.257 | 0.219 | 0.779 | 0.000 | 1250 | 0.012 | 124005 | 17821 | 0.144 |
| MY795   | Europe     | 0.260 | 0.523 | 0.768 | 0.000 | 1570 | 0.016 | 129122 | 27025 | 0.209 |
| MY920   | Europe     | 0.638 | 0.756 | 0.717 | 0.707 | 943  | 0.009 | 112924 | 17326 | 0.153 |
| N2      | Europe     | 0.376 | 1.000 | 0.890 | 0.257 | NA   | NA    | NA     | NA    | NA    |
| NIC1    | Europe     | 0.292 | 0.910 | 0.711 | 0.641 | 1318 | 0.013 | 99391  | 20769 | 0.209 |
| NIC1049 | Europe     | 0.286 | 0.487 | 0.739 | 0.061 | 358  | 0.004 | 85411  | 5406  | 0.063 |
| NIC1107 | Europe     | 0.292 | 0.000 | 0.713 | 0.134 | 381  | 0.004 | 63682  | 8695  | 0.137 |
| NIC1119 | S. America | 0.816 | 0.783 | 0.589 | 0.662 | 1869 | 0.019 | 152106 | 37905 | 0.249 |
| NIC166  | Europe     | 0.073 | 0.622 | 0.723 | 0.269 | 1115 | 0.011 | 105698 | 15695 | 0.148 |
| NIC195  | Atlantic   | 0.000 | 0.164 | 0.062 | 0.421 | 3307 | 0.033 | 199802 | 62556 | 0.313 |
| NIC199  | Atlantic   | 0.307 | 0.000 | 0.141 | 0.000 | 2923 | 0.029 | 210803 | 56680 | 0.269 |
| NIC2    | Europe     | 0.292 | 1.000 | 0.820 | 0.978 | 163  | 0.002 | 31341  | 2270  | 0.072 |
| NIC207  | Europe     | 0.292 | 0.599 | 0.865 | 0.988 | 532  | 0.005 | 73533  | 7154  | 0.097 |
| NIC231  | Europe     | 0.792 | 0.252 | 0.865 | 0.823 | 1140 | 0.011 | 101135 | 13884 | 0.137 |
| NIC236  | Europe     | 0.236 | 0.287 | 0.673 | 0.399 | 1689 | 0.017 | 121592 | 23549 | 0.194 |
| NIC242  | Europe     | 0.312 | 0.602 | 0.756 | 0.314 | 1191 | 0.012 | 87395  | 18871 | 0.216 |
| NIC251  | Atlantic   | 0.000 | 0.000 | 0.000 | 0.000 | 3802 | 0.038 | 278599 | 77406 | 0.278 |
| NIC252  | Atlantic   | 0.000 | 0.382 | 0.274 | 0.220 | 2431 | 0.024 | 192408 | 48136 | 0.250 |
| NIC255  | Europe     | 0.292 | 0.652 | 0.862 | 0.979 | 1067 | 0.011 | 77276  | 13333 | 0.173 |
| NIC256  | Europe     | 0.412 | 0.000 | 0.559 | 0.259 | 3151 | 0.031 | 182367 | 50546 | 0.277 |
| NIC258  | Europe     | 0.398 | 0.234 | 0.058 | 0.000 | 3884 | 0.039 | 236759 | 69948 | 0.295 |
| NIC259  | Europe     | 0.280 | 0.000 | 0.739 | 0.424 | 1120 | 0.011 | 129530 | 17763 | 0.137 |
| NIC260  | Europe     | 0.302 | 0.636 | 0.650 | 0.078 | 2600 | 0.026 | 192297 | 49858 | 0.259 |
| NIC261  | Europe     | 0.477 | 0.000 | 0.484 | 0.000 | 2914 | 0.029 | 212854 | 49906 | 0.234 |
| NIC262  | Europe     | 0.434 | 0.000 | 0.484 | 0.074 | 3075 | 0.031 | 207470 | 54754 | 0.264 |
| NIC265  | Europe     | 0.256 | 0.000 | 0.085 | 0.000 | 2901 | 0.029 | 250079 | 54501 | 0.218 |

|        |            |       |       |       |       |      |       |        |       |       |
|--------|------------|-------|-------|-------|-------|------|-------|--------|-------|-------|
| NIC266 | Europe     | 0.194 | 0.164 | 0.218 | 0.165 | 2197 | 0.022 | 166172 | 41867 | 0.252 |
| NIC267 | Europe     | 0.073 | 0.714 | 0.868 | 0.275 | 1107 | 0.011 | 115423 | 15514 | 0.134 |
| NIC268 | Europe     | 0.000 | 0.467 | 0.226 | 0.279 | 2243 | 0.022 | 181716 | 36982 | 0.204 |
| NIC269 | Europe     | 0.397 | 0.000 | 0.339 | 0.069 | 2088 | 0.021 | 165440 | 31258 | 0.189 |
| NIC271 | Europe     | 0.477 | 0.000 | 0.484 | 0.259 | 3178 | 0.032 | 193468 | 54014 | 0.279 |
| NIC272 | Europe     | 0.264 | 0.000 | 0.758 | 0.000 | 1766 | 0.018 | 155743 | 29770 | 0.191 |
| NIC274 | Europe     | 0.685 | 0.313 | 0.658 | 0.096 | 1339 | 0.013 | 139239 | 26480 | 0.190 |
| NIC275 | Europe     | 0.840 | 0.522 | 0.847 | 0.616 | 2548 | 0.025 | 142895 | 40005 | 0.280 |
| NIC276 | Europe     | 0.308 | 1.000 | 0.868 | 0.000 | 1249 | 0.012 | 109724 | 18135 | 0.165 |
| NIC277 | Europe     | 0.410 | 0.624 | 0.953 | 0.134 | 791  | 0.008 | 104923 | 12374 | 0.118 |
| NIC3   | Europe     | 0.605 | 0.602 | 0.817 | 0.124 | 1194 | 0.012 | 138590 | 18969 | 0.137 |
| NIC501 | Europe     | 0.614 | 0.000 | 0.204 | 0.000 | 1938 | 0.019 | 167069 | 39544 | 0.237 |
| NIC511 | Europe     | 0.151 | 0.826 | 0.829 | 0.257 | 839  | 0.008 | 113548 | 13223 | 0.116 |
| NIC513 | Europe     | 0.184 | 0.370 | 0.695 | 0.355 | 1623 | 0.016 | 151535 | 33284 | 0.220 |
| NIC514 | Europe     | 0.329 | 0.292 | 0.794 | 0.424 | 1733 | 0.017 | 141823 | 27931 | 0.197 |
| NIC515 | Europe     | 0.081 | 0.685 | 0.395 | 0.706 | 2188 | 0.022 | 158133 | 37847 | 0.239 |
| NIC522 | Europe     | 0.621 | 0.093 | 0.805 | 0.465 | 934  | 0.009 | 104875 | 19369 | 0.185 |
| NIC523 | Europe     | 0.151 | 0.091 | 0.868 | 0.543 | 1398 | 0.014 | 151910 | 23626 | 0.156 |
| NIC526 | Europe     | 0.222 | 0.000 | 0.817 | 0.426 | 1177 | 0.012 | 140427 | 23111 | 0.165 |
| NIC527 | Europe     | 0.378 | 0.139 | 0.768 | 0.000 | 1129 | 0.011 | 127670 | 21845 | 0.171 |
| NIC528 | Europe     | 0.376 | 0.859 | 0.707 | 0.760 | 1725 | 0.017 | 137874 | 34604 | 0.251 |
| NIC529 | Europe     | 0.426 | 0.203 | 0.868 | 0.451 | 924  | 0.009 | 103634 | 14178 | 0.137 |
| PB303  | Unknown    | 0.717 | 1.000 | 0.865 | 0.829 | 1447 | 0.014 | 98449  | 25381 | 0.258 |
| PS2025 | N. America | 0.081 | 0.517 | 0.000 | 0.069 | 2425 | 0.024 | 197969 | 48596 | 0.245 |
| PX179  | N. America | 0.171 | 0.791 | 0.904 | 0.991 | 513  | 0.005 | 65022  | 9408  | 0.145 |
| QG2075 | N. America | 0.237 | 0.758 | 0.130 | 0.566 | 2166 | 0.022 | 176964 | 44474 | 0.251 |
| QG2811 | Australia  | 0.581 | 0.646 | 0.829 | 0.253 | 1259 | 0.013 | 101304 | 24664 | 0.243 |
| QG2813 | Australia  | 0.519 | 0.732 | 0.768 | 0.511 | 1215 | 0.012 | 118225 | 21860 | 0.185 |
| QG2818 | Australia  | 1.000 | 1.000 | 0.953 | 1.000 | 550  | 0.005 | 92910  | 9877  | 0.106 |
| QG2823 | Australia  | 0.286 | 0.742 | 0.817 | 0.903 | 1354 | 0.014 | 117772 | 19541 | 0.166 |
| QG2824 | Australia  | 0.390 | 0.666 | 0.953 | 0.851 | 766  | 0.008 | 112581 | 13457 | 0.120 |
| QG2825 | Australia  | 0.384 | 0.671 | 0.817 | 0.828 | 1354 | 0.014 | 109802 | 18777 | 0.171 |
| QG2827 | Australia  | 0.560 | 0.376 | 0.367 | 0.565 | 2109 | 0.021 | 176894 | 43889 | 0.248 |
| QG2828 | Australia  | 0.560 | 0.376 | 0.391 | 0.565 | 2114 | 0.021 | 175041 | 43826 | 0.250 |
| QG2832 | Australia  | 0.673 | 0.418 | 0.226 | 0.391 | 1497 | 0.015 | 146501 | 30344 | 0.207 |
| QG2835 | Australia  | 0.677 | 0.418 | 0.374 | 0.783 | 1915 | 0.019 | 151287 | 32585 | 0.215 |
| QG2836 | Australia  | 0.723 | 0.764 | 0.422 | 0.429 | 1597 | 0.016 | 134594 | 23837 | 0.177 |

|        |            |       |       |       |       |       |       |        |        |       |
|--------|------------|-------|-------|-------|-------|-------|-------|--------|--------|-------|
| QG2837 | Australia  | 0.673 | 1.000 | 0.226 | 0.400 | 1792  | 0.018 | 143515 | 35248  | 0.246 |
| QG2838 | Australia  | 0.985 | 0.756 | 0.316 | 0.645 | 1932  | 0.019 | 159248 | 39142  | 0.246 |
| QG2841 | Australia  | 0.916 | 0.947 | 0.672 | 0.000 | 1302  | 0.013 | 136119 | 23138  | 0.170 |
| QG2843 | Australia  | 0.976 | 1.000 | 0.901 | 0.999 | 560   | 0.006 | 92856  | 9613   | 0.104 |
| QG2846 | Australia  | 0.248 | 0.320 | 0.000 | 0.209 | 2180  | 0.022 | 179522 | 41735  | 0.232 |
| QG2850 | Australia  | 0.652 | 0.794 | 0.573 | 0.959 | 1162  | 0.012 | 123595 | 23978  | 0.194 |
| QG2854 | Australia  | 0.593 | 0.701 | 0.298 | 0.849 | 1870  | 0.019 | 161265 | 37637  | 0.233 |
| QG2855 | Australia  | 0.593 | 0.657 | 0.251 | 0.849 | 1827  | 0.018 | 166740 | 37714  | 0.226 |
| QG2857 | Australia  | 0.580 | 0.675 | 0.465 | 0.849 | 1731  | 0.017 | 154760 | 34344  | 0.222 |
| QG2873 | Australia  | 0.698 | 0.822 | 0.216 | 0.936 | 1779  | 0.018 | 155811 | 37394  | 0.240 |
| QG2874 | Australia  | 0.698 | 0.791 | 0.216 | 0.936 | 1848  | 0.018 | 157752 | 38555  | 0.244 |
| QG2875 | Australia  | 0.647 | 0.780 | 0.569 | 0.186 | 1739  | 0.017 | 147350 | 31179  | 0.212 |
| QG2877 | Australia  | 0.615 | 0.619 | 0.369 | 0.786 | 2033  | 0.020 | 157354 | 38180  | 0.243 |
| QG2932 | Australia  | 0.529 | 0.858 | 0.724 | 0.998 | 1086  | 0.011 | 125449 | 20320  | 0.162 |
| QG536  | N. America | 0.846 | 1.000 | 0.745 | 0.301 | 1712  | 0.017 | 122846 | 36058  | 0.294 |
| QG556  | N. America | 0.000 | 0.512 | 0.088 | 0.000 | 2783  | 0.028 | 168531 | 41279  | 0.245 |
| QG557  | N. America | 0.222 | 0.404 | 0.892 | 0.076 | 1876  | 0.019 | 123964 | 19839  | 0.160 |
| QW947  | S. America | 0.799 | 0.260 | 0.606 | 0.481 | 1740  | 0.017 | 156656 | 33634  | 0.215 |
| QX1211 | N. America | 0.000 | 0.000 | 0.000 | 0.000 | 5240  | 0.052 | 488149 | 123859 | 0.254 |
| QX1212 | N. America | 0.222 | 0.743 | 0.288 | 0.312 | 2032  | 0.020 | 163520 | 39953  | 0.244 |
| QX1233 | N. America | 0.141 | 0.381 | 0.601 | 0.222 | 1543  | 0.015 | 140996 | 21967  | 0.156 |
| QX1791 | Hawaii     | 0.000 | 0.000 | 0.000 | 0.000 | 3694  | 0.037 | 263167 | 92669  | 0.352 |
| QX1792 | Hawaii     | 0.000 | 0.000 | 0.479 | 0.289 | 2129  | 0.021 | 202531 | 39836  | 0.197 |
| QX1793 | Hawaii     | 0.000 | 0.000 | 0.053 | 0.000 | 2178  | 0.022 | 214878 | 42961  | 0.200 |
| QX1794 | Hawaii     | 0.000 | 0.000 | 0.000 | 0.000 | 2988  | 0.030 | 227050 | 57989  | 0.255 |
| RC301  | Europe     | 0.231 | 1.000 | 0.865 | 0.829 | 1480  | 0.015 | 105523 | 25921  | 0.246 |
| WN2001 | Europe     | 0.000 | 0.502 | 0.368 | 0.296 | 2487  | 0.025 | 188044 | 46097  | 0.245 |
| WN2002 | Europe     | 0.289 | 0.743 | 0.698 | 0.427 | 1565  | 0.016 | 114573 | 32070  | 0.280 |
| WN2033 | Europe     | 0.374 | 0.507 | 0.904 | 0.365 | 1696  | 0.017 | 132699 | 23982  | 0.181 |
| WN2050 | Europe     | 0.292 | 0.000 | 0.000 | 0.134 | 1617  | 0.016 | 133276 | 35214  | 0.264 |
| WN2063 | Europe     | 0.000 | 0.330 | 0.825 | 0.341 | 1079  | 0.011 | 120087 | 17700  | 0.147 |
| WN2064 | Europe     | 0.339 | 0.857 | 0.903 | 0.061 | 439   | 0.004 | 68962  | 5196   | 0.075 |
| WN2066 | Europe     | 0.320 | 0.618 | 0.640 | 0.076 | 752   | 0.007 | 81894  | 17704  | 0.216 |
| XZ1513 | Hawaii     | 0.000 | 0.000 | 0.000 | 0.000 | 2623  | 0.026 | 235948 | 54106  | 0.229 |
| XZ1514 | Hawaii     | 0.000 | 0.000 | 0.000 | 0.000 | 6603  | 0.066 | 497062 | 151663 | 0.305 |
| XZ1515 | Hawaii     | 0.000 | 0.000 | 0.224 | 0.000 | 2253  | 0.022 | 234705 | 42956  | 0.183 |
| XZ1516 | Hawaii     | 0.000 | 0.000 | 0.000 | 0.000 | 11673 | 0.116 | 676100 | 322172 | 0.477 |

|        |            |       |       |       |       |      |       |        |       |       |
|--------|------------|-------|-------|-------|-------|------|-------|--------|-------|-------|
| XZ1672 | N. America | 0.171 | 0.520 | 0.904 | 0.558 | 846  | 0.008 | 100578 | 12368 | 0.123 |
| XZ1734 | S. America | 0.605 | 0.292 | 0.521 | 0.508 | 2120 | 0.021 | 154270 | 34769 | 0.225 |
| XZ1735 | S. America | 0.362 | 0.425 | 0.432 | 0.457 | 1592 | 0.016 | 140656 | 29981 | 0.213 |
| XZ1756 | N. America | 0.383 | 0.443 | 0.749 | 0.213 | 1792 | 0.018 | 125407 | 29700 | 0.237 |
| XZ2018 | Unknown    | 0.096 | 0.826 | 0.904 | 0.999 | 834  | 0.008 | 74749  | 11020 | 0.147 |
| XZ2019 | N. America | 0.000 | 0.000 | 0.000 | 0.000 | 2717 | 0.027 | 235033 | 47753 | 0.203 |
| XZ2020 | N. America | 0.096 | 0.752 | 0.248 | 0.388 | 1051 | 0.010 | 120434 | 22352 | 0.186 |



### Supplementary Table 4 | Genome assembly and annotations metrics

Genome assembly and annotations metrics shown for the N2 reference genome, the CB4856 long-read genome, and 14 wild isotype genomes generated here. BUSCO (version 4.0.6) completeness scores, using the nematoda\_ob10 dataset, are shown for the genome (using the option *-m genome*) and gene set (using the option *-m proteins*) separately. Gene set completeness scores were calculated using only the longest isoform of each protein coding gene. Note: the CB4856 genome was scaffolded based on alignments to the N2 reference genome. To avoid accidentally introducing errors, particularly in hyper-divergent regions where nucleotide identity is low and alignment is difficult, we opted not to use the same approach.

| Isotype                         | Span (Mb) | Number of contigs | Number of contigs >50kb | Contig N50 length (Mb) | Contig N50 number | Longest contig (Mb) | Span of Ns (kb) | BUSCO genome complete (%) / fragmented (%) | Number of predicted genes | BUSCO gene set complete (%) / fragmented (%) |
|---------------------------------|-----------|-------------------|-------------------------|------------------------|-------------------|---------------------|-----------------|--------------------------------------------|---------------------------|----------------------------------------------|
| N2 (reference)                  | 100.29    | 7                 | 6                       | 17.49                  | 3                 | 20.92               | 0.00            | 99.4 / 0.1                                 | 20,190                    | 99.4 / 0.3                                   |
| CB4856 (Kim <i>et al.</i> 2019) | 102.91    | 7                 | 6                       | 17.99                  | 3                 | 21.39               | 69.00           | 99.3 / 0.1                                 | 22,229                    | 96.4 / 2.2                                   |
| DL238                           | 103.40    | 118               | 65                      | 2.69                   | 13                | 6.28                | 0.00            | 99.4 / 0.2                                 | 23,177                    | 96.2 / 2.4                                   |
| ECA36                           | 105.62    | 82                | 63                      | 2.84                   | 12                | 8.75                | 0.00            | 99.5 / 0.2                                 | 23,610                    | 96.3 / 2.4                                   |
| ECA396                          | 103.36    | 128               | 72                      | 2.64                   | 15                | 4.60                | 0.00            | 99.5 / 0.2                                 | 23,227                    | 96.2 / 2.3                                   |
| EG4725                          | 103.85    | 80                | 48                      | 3.61                   | 11                | 6.26                | 0.00            | 99.6 / 0.1                                 | 23,178                    | 96.4 / 2.2                                   |
| JU1400                          | 103.28    | 67                | 53                      | 2.88                   | 13                | 5.71                | 0.00            | 99.3 / 0.2                                 | 23,229                    | 96.0 / 2.2                                   |
| JU2526                          | 102.93    | 98                | 78                      | 2.07                   | 16                | 5.05                | 0.00            | 99.5 / 0.1                                 | 23,140                    | 95.9 / 2.6                                   |
| JU2600                          | 104.21    | 87                | 56                      | 3.24                   | 13                | 5.77                | 0.00            | 99.6 / 0.1                                 | 23,216                    | 96.3 / 2.4                                   |
| JU310                           | 114.26    | 283               | 139                     | 2.68                   | 15                | 6.22                | 0.00            | 99.6 / 0.1                                 | 25,821                    | 96.2 / 2.3                                   |
| MY2147                          | 103.78    | 74                | 57                      | 3.67                   | 12                | 5.80                | 0.00            | 99.6 / 0.1                                 | 23,164                    | 96.4 / 2.3                                   |
| MY2693                          | 102.92    | 113               | 59                      | 2.86                   | 13                | 6.21                | 0.00            | 99.6 / 0.1                                 | 23,203                    | 96.1 / 2.5                                   |
| NIC2                            | 103.06    | 89                | 67                      | 2.80                   | 13                | 6.79                | 0.00            | 99.7 / 0.1                                 | 23,171                    | 96.2 / 2.5                                   |
| NIC526                          | 104.20    | 85                | 58                      | 2.81                   | 13                | 6.78                | 0.00            | 99.6 / 0.1                                 | 23,387                    | 96.1 / 2.6                                   |
| QX1794                          | 108.69    | 185               | 107                     | 2.49                   | 14                | 6.50                | 0.00            | 99.5 / 0.1                                 | 24,207                    | 96.1 / 2.2                                   |
| XZ1516                          | 105.79    | 149               | 89                      | 2.05                   | 19                | 5.11                | 0.00            | 99.5 / 0.2                                 | 23,791                    | 96.1 / 2.5                                   |

**Supplementary Table 5 | Distribution of the species-wide hyper-divergent regions in *C. elegans***

The genomic coordinates of all hyper-divergent regions described in the manuscript. We calculated the frequency each 1 kb genomic bin was classified as hyper-divergent across the *C. elegans* species. For each hyper-divergent region, we report the average 1 kb bin frequency.

| Chromosome | Start    | End      | Size (bp) | Frequency  |
|------------|----------|----------|-----------|------------|
| I          | 863000   | 875000   | 12000     | 0.08663618 |
| I          | 1018000  | 1063000  | 45000     | 0.12445799 |
| I          | 1101000  | 1127000  | 26000     | 0.07422608 |
| I          | 1169000  | 1179000  | 10000     | 0.01646341 |
| I          | 1181000  | 1224000  | 43000     | 0.12712706 |
| I          | 1337000  | 1425000  | 88000     | 0.13639828 |
| I          | 1513000  | 1529000  | 16000     | 0.16215701 |
| I          | 1563000  | 1587000  | 24000     | 0.01575203 |
| I          | 1600000  | 1628000  | 28000     | 0.09037456 |
| I          | 1749000  | 1772000  | 23000     | 0.10418876 |
| I          | 1864000  | 1873000  | 9000      | 0.10060976 |
| I          | 1895000  | 1938000  | 43000     | 0.17129892 |
| I          | 1949000  | 1967000  | 18000     | 0.37466125 |
| I          | 2044000  | 2055000  | 11000     | 0.04296009 |
| I          | 2157000  | 2170000  | 13000     | 0.14798311 |
| I          | 2328000  | 2363000  | 35000     | 0.41010453 |
| I          | 2467000  | 2486000  | 19000     | 0.10943517 |
| I          | 2799000  | 2809000  | 10000     | 0.01829268 |
| I          | 3019000  | 3034000  | 15000     | 0.0550813  |
| I          | 3060000  | 3073000  | 13000     | 0.06214822 |
| I          | 3183000  | 3195000  | 12000     | 0.10670732 |
| I          | 3229000  | 3241000  | 12000     | 0.20147358 |
| I          | 3586000  | 3598000  | 12000     | 0.00304878 |
| I          | 3799000  | 3809000  | 10000     | 0.00304878 |
| I          | 4453000  | 4463000  | 10000     | 0.00426829 |
| I          | 10306000 | 10315000 | 9000      | 0.00914634 |
| I          | 10906000 | 10945000 | 39000     | 0.01657286 |
| I          | 10953000 | 11010000 | 57000     | 0.03712024 |
| I          | 11432000 | 11456000 | 24000     | 0.07050305 |
| I          | 11468000 | 11482000 | 14000     | 0.02482578 |
| I          | 11833000 | 11842000 | 9000      | 0.01490515 |
| I          | 11915000 | 11925000 | 10000     | 0.14756098 |
| I          | 12042000 | 12057000 | 15000     | 0.03780488 |

|    |          |          |        |            |
|----|----------|----------|--------|------------|
| I  | 12061000 | 12158000 | 97000  | 0.06389867 |
| I  | 12206000 | 12216000 | 10000  | 0.00304878 |
| I  | 12220000 | 12475000 | 255000 | 0.01846007 |
| I  | 12606000 | 12682000 | 76000  | 0.05267169 |
| I  | 12688000 | 12698000 | 10000  | 0.02042683 |
| I  | 12751000 | 12763000 | 12000  | 0.21620935 |
| I  | 12785000 | 12809000 | 24000  | 0.01816565 |
| I  | 12986000 | 12995000 | 9000   | 0.00304878 |
| I  | 13012000 | 13226000 | 214000 | 0.04628733 |
| I  | 13341000 | 13368000 | 27000  | 0.03331075 |
| I  | 13375000 | 13386000 | 11000  | 0.04711752 |
| I  | 13799000 | 13820000 | 21000  | 0.0203252  |
| I  | 14027000 | 14037000 | 10000  | 0.01402439 |
| I  | 14281000 | 14319000 | 38000  | 0.01131258 |
| I  | 14410000 | 14425000 | 15000  | 0.09898374 |
| I  | 14491000 | 14500000 | 9000   | 0.0196477  |
| I  | 14503000 | 14518000 | 15000  | 0.10386179 |
| I  | 14535000 | 14554000 | 19000  | 0.01957638 |
| II | 262000   | 332000   | 70000  | 0.0527439  |
| II | 403000   | 424000   | 21000  | 0.00391986 |
| II | 429000   | 457000   | 28000  | 0.03059669 |
| II | 464000   | 629000   | 165000 | 0.0313932  |
| II | 631000   | 682000   | 51000  | 0.03186275 |
| II | 868000   | 994000   | 126000 | 0.06571816 |
| II | 1001000  | 1076000  | 75000  | 0.06617886 |
| II | 1108000  | 1117000  | 9000   | 0.01219512 |
| II | 1256000  | 1310000  | 54000  | 0.16327913 |
| II | 1353000  | 1362000  | 9000   | 0.06402439 |
| II | 1369000  | 1439000  | 70000  | 0.01019164 |
| II | 1515000  | 1700000  | 185000 | 0.22343441 |
| II | 1703000  | 2194000  | 491000 | 0.32531295 |
| II | 2219000  | 2509000  | 290000 | 0.40447855 |
| II | 2528000  | 2654000  | 126000 | 0.07108982 |
| II | 2715000  | 2724000  | 9000   | 0.00304878 |
| II | 2785000  | 2798000  | 13000  | 0.01242964 |
| II | 2799000  | 2810000  | 11000  | 0.0058204  |
| II | 2835000  | 2845000  | 10000  | 0.33414634 |

|    |          |          |        |            |
|----|----------|----------|--------|------------|
| II | 2870000  | 2925000  | 55000  | 0.16385809 |
| II | 2965000  | 2974000  | 9000   | 0.00813008 |
| II | 3060000  | 3087000  | 27000  | 0.26343722 |
| II | 3177000  | 3271000  | 94000  | 0.52075765 |
| II | 3280000  | 3399000  | 119000 | 0.3860166  |
| II | 3499000  | 3512000  | 13000  | 0.04620075 |
| II | 3660000  | 3780000  | 120000 | 0.34751016 |
| II | 3800000  | 3887000  | 87000  | 0.09006168 |
| II | 3902000  | 3926000  | 24000  | 0.00304878 |
| II | 3942000  | 3954000  | 12000  | 0.00304878 |
| II | 3987000  | 4013000  | 26000  | 0.03470919 |
| II | 4174000  | 4186000  | 12000  | 0.00304878 |
| II | 4197000  | 4208000  | 11000  | 0.01801552 |
| II | 4303000  | 4312000  | 9000   | 0.0152439  |
| II | 4432000  | 4444000  | 12000  | 0.02769309 |
| II | 4720000  | 4731000  | 11000  | 0.05792683 |
| II | 5295000  | 5315000  | 20000  | 0.00304878 |
| II | 5839000  | 5869000  | 30000  | 0.00304878 |
| II | 10429000 | 10465000 | 36000  | 0.03353659 |
| II | 10626000 | 10674000 | 48000  | 0.01587907 |
| II | 11367000 | 11400000 | 33000  | 0.00554324 |
| II | 11980000 | 11994000 | 14000  | 0.11672474 |
| II | 12012000 | 12022000 | 10000  | 0.08323171 |
| II | 12028000 | 12038000 | 10000  | 0.10518293 |
| II | 12061000 | 12070000 | 9000   | 0.0304878  |
| II | 12083000 | 12108000 | 25000  | 0.04158537 |
| II | 12289000 | 12302000 | 13000  | 0.00938086 |
| II | 12397000 | 12407000 | 10000  | 0.00823171 |
| II | 12454000 | 12622000 | 168000 | 0.06854312 |
| II | 12623000 | 12653000 | 30000  | 0.00558943 |
| II | 12659000 | 12717000 | 58000  | 0.04331371 |
| II | 12718000 | 12732000 | 14000  | 0.01263066 |
| II | 12738000 | 12748000 | 10000  | 0.01310976 |
| II | 12773000 | 12786000 | 13000  | 0.00304878 |
| II | 12798000 | 12819000 | 21000  | 0.02642276 |
| II | 12867000 | 12881000 | 14000  | 0.07796167 |
| II | 12892000 | 12901000 | 9000   | 0.00304878 |

|     |          |          |        |            |
|-----|----------|----------|--------|------------|
| II  | 12928000 | 12938000 | 10000  | 0.00304878 |
| II  | 13120000 | 13154000 | 34000  | 0.00887733 |
| II  | 13199000 | 13223000 | 24000  | 0.02566057 |
| II  | 13244000 | 13265000 | 21000  | 0.12166086 |
| II  | 13320000 | 13341000 | 21000  | 0.11541812 |
| II  | 13354000 | 13415000 | 61000  | 0.20186925 |
| II  | 13430000 | 13467000 | 37000  | 0.08833223 |
| II  | 13472000 | 13496000 | 24000  | 0.00635163 |
| II  | 13520000 | 13579000 | 59000  | 0.16577098 |
| II  | 13580000 | 13590000 | 10000  | 0.00457317 |
| II  | 13612000 | 13630000 | 18000  | 0.03895664 |
| II  | 13642000 | 13679000 | 37000  | 0.06056361 |
| II  | 13736000 | 13763000 | 27000  | 0.05770099 |
| II  | 13771000 | 13780000 | 9000   | 0.00304878 |
| II  | 13843000 | 13852000 | 9000   | 0.0304878  |
| II  | 13862000 | 13886000 | 24000  | 0.14278455 |
| II  | 13889000 | 13898000 | 9000   | 0.02134146 |
| II  | 13936000 | 13957000 | 21000  | 0.02366434 |
| II  | 13967000 | 13978000 | 11000  | 0.01108647 |
| II  | 14076000 | 14090000 | 14000  | 0.07012195 |
| II  | 14224000 | 14236000 | 12000  | 0.04674797 |
| II  | 14303000 | 14338000 | 35000  | 0.08057491 |
| II  | 14979000 | 14988000 | 9000   | 0.04234417 |
| III | 0        | 345000   | 345000 | 0.12352421 |
| III | 697000   | 708000   | 11000  | 0.66407982 |
| III | 920000   | 934000   | 14000  | 0.01067073 |
| III | 936000   | 1098000  | 162000 | 0.33278756 |
| III | 1117000  | 1140000  | 23000  | 0.03446448 |
| III | 1172000  | 1437000  | 265000 | 0.28515877 |
| III | 1465000  | 1549000  | 84000  | 0.06435105 |
| III | 1559000  | 1574000  | 15000  | 0.01869919 |
| III | 1578000  | 1619000  | 41000  | 0.06685009 |
| III | 1625000  | 1639000  | 14000  | 0.00979965 |
| III | 1666000  | 1679000  | 13000  | 0.01313321 |
| III | 1682000  | 1706000  | 24000  | 0.03125    |
| III | 1722000  | 1732000  | 10000  | 0.01737805 |
| III | 1746000  | 1799000  | 53000  | 0.04780258 |

|     |          |          |        |            |
|-----|----------|----------|--------|------------|
| III | 1827000  | 1842000  | 15000  | 0.10081301 |
| III | 1843000  | 1859000  | 16000  | 0.01333841 |
| III | 1861000  | 1870000  | 9000   | 0.03387534 |
| III | 1899000  | 1917000  | 18000  | 0.10162602 |
| III | 1984000  | 2.00E+06 | 16000  | 0.07602896 |
| III | 2037000  | 2101000  | 64000  | 0.02372332 |
| III | 2199000  | 2358000  | 159000 | 0.11058061 |
| III | 2369000  | 2445000  | 76000  | 0.11501123 |
| III | 2512000  | 2539000  | 27000  | 0.07983288 |
| III | 2567000  | 2576000  | 9000   | 0.09146341 |
| III | 2589000  | 2613000  | 24000  | 0.15612297 |
| III | 2687000  | 2696000  | 9000   | 0.09044715 |
| III | 2763000  | 2778000  | 15000  | 0.02947154 |
| III | 2788000  | 2803000  | 15000  | 0.04654472 |
| III | 2815000  | 2838000  | 23000  | 0.0292948  |
| III | 2901000  | 2917000  | 16000  | 0.00304878 |
| III | 2959000  | 3012000  | 53000  | 0.00719052 |
| III | 3069000  | 3089000  | 20000  | 0.10487805 |
| III | 3289000  | 3334000  | 45000  | 0.20406504 |
| III | 7669000  | 7678000  | 9000   | 0.07621951 |
| III | 9912000  | 9968000  | 56000  | 0.09097343 |
| III | 11037000 | 11050000 | 13000  | 0.065197   |
| III | 11093000 | 11143000 | 50000  | 0.06530488 |
| III | 11152000 | 11169000 | 17000  | 0.09379484 |
| III | 11273000 | 11283000 | 10000  | 0.21128049 |
| III | 11567000 | 11593000 | 26000  | 0.03764071 |
| III | 11922000 | 11931000 | 9000   | 0.00914634 |
| III | 12035000 | 12050000 | 15000  | 0.00304878 |
| III | 12062000 | 12074000 | 12000  | 0.13135163 |
| III | 12232000 | 12245000 | 13000  | 0.02110694 |
| III | 12251000 | 12260000 | 9000   | 0.00914634 |
| III | 12296000 | 12385000 | 89000  | 0.22163606 |
| III | 12409000 | 12423000 | 14000  | 0.05052265 |
| III | 12425000 | 12451000 | 26000  | 0.00422139 |
| III | 12526000 | 12535000 | 9000   | 0.04742547 |
| III | 12598000 | 12608000 | 10000  | 0.02439024 |
| III | 12673000 | 12683000 | 10000  | 0.14420732 |

|     |          |          |        |            |
|-----|----------|----------|--------|------------|
| III | 12729000 | 12760000 | 31000  | 0.00629426 |
| III | 12824000 | 12836000 | 12000  | 0.00304878 |
| III | 12992000 | 13002000 | 10000  | 0.00579268 |
| III | 13231000 | 13243000 | 12000  | 0.00304878 |
| IV  | 16000    | 32000    | 16000  | 0.05945122 |
| IV  | 1005000  | 1022000  | 17000  | 0.06258967 |
| IV  | 1074000  | 1098000  | 24000  | 0.15866362 |
| IV  | 1113000  | 1125000  | 12000  | 0.03455285 |
| IV  | 1228000  | 1352000  | 124000 | 0.08448072 |
| IV  | 1536000  | 1551000  | 15000  | 0.0050813  |
| IV  | 1590000  | 1609000  | 19000  | 0.05327343 |
| IV  | 1816000  | 1888000  | 72000  | 0.00821477 |
| IV  | 1983000  | 2034000  | 51000  | 0.13259206 |
| IV  | 2054000  | 2067000  | 13000  | 0.005394   |
| IV  | 2105000  | 2116000  | 11000  | 0.00498891 |
| IV  | 2184000  | 2210000  | 26000  | 0.09111163 |
| IV  | 2264000  | 2275000  | 11000  | 0.18902439 |
| IV  | 2335000  | 2366000  | 31000  | 0.10188828 |
| IV  | 2464000  | 2481000  | 17000  | 0.01058106 |
| IV  | 2487000  | 2507000  | 20000  | 0.01128049 |
| IV  | 2519000  | 2533000  | 14000  | 0.05422474 |
| IV  | 2552000  | 2603000  | 51000  | 0.43896461 |
| IV  | 2685000  | 2746000  | 61000  | 0.32521991 |
| IV  | 2759000  | 2770000  | 11000  | 0.02549889 |
| IV  | 2781000  | 2800000  | 19000  | 0.01941592 |
| IV  | 2809000  | 2829000  | 20000  | 0.03612805 |
| IV  | 2831000  | 2843000  | 12000  | 0.00304878 |
| IV  | 2859000  | 2891000  | 32000  | 0.2105564  |
| IV  | 2949000  | 2960000  | 11000  | 0.01274945 |
| IV  | 3369000  | 3383000  | 14000  | 0.07142857 |
| IV  | 3455000  | 3480000  | 25000  | 0.00304878 |
| IV  | 3506000  | 3517000  | 11000  | 0.01773836 |
| IV  | 3684000  | 3694000  | 10000  | 0.15640244 |
| IV  | 3732000  | 3744000  | 12000  | 0.00813008 |
| IV  | 3810000  | 3822000  | 12000  | 0.00304878 |
| IV  | 3823000  | 3833000  | 10000  | 0.05487805 |
| IV  | 3887000  | 3973000  | 86000  | 0.07111458 |

|    |          |          |       |            |
|----|----------|----------|-------|------------|
| IV | 4052000  | 4068000  | 16000 | 0.02477134 |
| IV | 4098000  | 4171000  | 73000 | 0.39308386 |
| IV | 4347000  | 4358000  | 11000 | 0.11419069 |
| IV | 4370000  | 4380000  | 10000 | 0.04481707 |
| IV | 4407000  | 4416000  | 9000  | 0.05792683 |
| IV | 5447000  | 5465000  | 18000 | 0.02828591 |
| IV | 5821000  | 5843000  | 22000 | 0.02757761 |
| IV | 6206000  | 6302000  | 96000 | 0.0593877  |
| IV | 6606000  | 6626000  | 20000 | 0.05304878 |
| IV | 6629000  | 6661000  | 32000 | 0.03544207 |
| IV | 7451000  | 7471000  | 20000 | 0.11402439 |
| IV | 12376000 | 12446000 | 70000 | 0.00688153 |
| IV | 12827000 | 12902000 | 75000 | 0.03495935 |
| IV | 12947000 | 12956000 | 9000  | 0.00304878 |
| IV | 12987000 | 12996000 | 9000  | 0.02743902 |
| IV | 13416000 | 13428000 | 12000 | 0.12754065 |
| IV | 13517000 | 13543000 | 26000 | 0.00879456 |
| IV | 13623000 | 13641000 | 18000 | 0.00304878 |
| IV | 13980000 | 14004000 | 24000 | 0.0152439  |
| IV | 14170000 | 14185000 | 15000 | 0.02764228 |
| IV | 14186000 | 14195000 | 9000  | 0.00914634 |
| IV | 14519000 | 14551000 | 32000 | 0.03134527 |
| IV | 15310000 | 15321000 | 11000 | 0.00304878 |
| IV | 15439000 | 15479000 | 40000 | 0.0601372  |
| IV | 15487000 | 15496000 | 9000  | 0.00304878 |
| IV | 15612000 | 15634000 | 22000 | 0.03616962 |
| IV | 15759000 | 15769000 | 10000 | 0.07103659 |
| IV | 15897000 | 15908000 | 11000 | 0.01995565 |
| IV | 15944000 | 15954000 | 10000 | 0.00304878 |
| IV | 16221000 | 16255000 | 34000 | 0.02501793 |
| IV | 16285000 | 16362000 | 77000 | 0.10433164 |
| IV | 16425000 | 16447000 | 22000 | 0.04226718 |
| IV | 16462000 | 16492000 | 30000 | 0.01351626 |
| IV | 16709000 | 16770000 | 61000 | 0.1170032  |
| IV | 16788000 | 16806000 | 18000 | 0.04674797 |
| IV | 16838000 | 16924000 | 86000 | 0.06891662 |
| IV | 17075000 | 17085000 | 10000 | 0.0222561  |



|    |          |          |         |            |
|----|----------|----------|---------|------------|
| IV | 17134000 | 17150000 | 16000   | 0.03429878 |
| IV | 17207000 | 17230000 | 23000   | 0.00596501 |
| IV | 17254000 | 17396000 | 142000  | 0.17264256 |
| IV | 17404000 | 17422000 | 18000   | 0.10687669 |
| IV | 17446000 | 17458000 | 12000   | 0.18267276 |
| V  | 10000    | 1141000  | 1131000 | 0.07596612 |
| V  | 1486000  | 1541000  | 55000   | 0.05515521 |
| V  | 1621000  | 1664000  | 43000   | 0.12344016 |
| V  | 1672000  | 1722000  | 50000   | 0.05469512 |
| V  | 1844000  | 1853000  | 9000    | 0.00304878 |
| V  | 1954000  | 1965000  | 11000   | 0.0058204  |
| V  | 2005000  | 2031000  | 26000   | 0.00574578 |
| V  | 2037000  | 2066000  | 29000   | 0.25851556 |
| V  | 2127000  | 2185000  | 58000   | 0.00846299 |
| V  | 2227000  | 2376000  | 149000  | 0.07055165 |
| V  | 2549000  | 3195000  | 646000  | 0.05841765 |
| V  | 3237000  | 3693000  | 456000  | 0.1346879  |
| V  | 3712000  | 3731000  | 19000   | 0.00304878 |
| V  | 3758000  | 4333000  | 575000  | 0.05503181 |
| V  | 4339000  | 4355000  | 16000   | 0.0390625  |
| V  | 4358000  | 4388000  | 30000   | 0.02296748 |
| V  | 4404000  | 4418000  | 14000   | 0.00500871 |
| V  | 4434000  | 4465000  | 31000   | 0.00304878 |
| V  | 4531000  | 4540000  | 9000    | 0.00609756 |
| V  | 4599000  | 4615000  | 16000   | 0.00304878 |
| V  | 4743000  | 4769000  | 26000   | 0.01512664 |
| V  | 4855000  | 4873000  | 18000   | 0.02879404 |
| V  | 4920000  | 4957000  | 37000   | 0.00988794 |
| V  | 4976000  | 5077000  | 101000  | 0.02460155 |
| V  | 5078000  | 5091000  | 13000   | 0.00750469 |
| V  | 5177000  | 5270000  | 93000   | 0.0035733  |
| V  | 6362000  | 6373000  | 11000   | 0.01829268 |
| V  | 6380000  | 6394000  | 14000   | 0.00304878 |
| V  | 6416000  | 6427000  | 11000   | 0.00609756 |
| V  | 6877000  | 6890000  | 13000   | 0.00304878 |
| V  | 7102000  | 7170000  | 68000   | 0.01129842 |
| V  | 7209000  | 7669000  | 460000  | 0.06605912 |

|   |          |          |         |            |
|---|----------|----------|---------|------------|
| V | 8741000  | 8775000  | 34000   | 0.01398852 |
| V | 8960000  | 8990000  | 30000   | 0.07042683 |
| V | 10454000 | 10464000 | 10000   | 0.00304878 |
| V | 12362000 | 12455000 | 93000   | 0.04756753 |
| V | 13044000 | 13124000 | 80000   | 0.00499238 |
| V | 13165000 | 13175000 | 10000   | 0.00304878 |
| V | 13500000 | 13511000 | 11000   | 0.01967849 |
| V | 13542000 | 13552000 | 10000   | 0.04512195 |
| V | 13588000 | 13601000 | 13000   | 0.06707317 |
| V | 13676000 | 13767000 | 91000   | 0.00512597 |
| V | 13806000 | 13962000 | 156000  | 0.00603893 |
| V | 14305000 | 14320000 | 15000   | 0.00304878 |
| V | 14501000 | 14662000 | 161000  | 0.04192547 |
| V | 15160000 | 15200000 | 40000   | 0.00914634 |
| V | 15210000 | 16161000 | 951000  | 0.08622503 |
| V | 16175000 | 16452000 | 277000  | 0.11743858 |
| V | 16458000 | 16512000 | 54000   | 0.3023374  |
| V | 16533000 | 16675000 | 142000  | 0.08457145 |
| V | 16693000 | 16781000 | 88000   | 0.06492517 |
| V | 16833000 | 17120000 | 287000  | 0.14553412 |
| V | 17132000 | 17742000 | 610000  | 0.19784086 |
| V | 17743000 | 17888000 | 145000  | 0.12626156 |
| V | 17901000 | 17910000 | 9000    | 0.00304878 |
| V | 17920000 | 18001000 | 81000   | 0.01637308 |
| V | 18048000 | 18074000 | 26000   | 0.3570591  |
| V | 18127000 | 18262000 | 135000  | 0.31935411 |
| V | 18270000 | 18333000 | 63000   | 0.02855207 |
| V | 18335000 | 18383000 | 48000   | 0.02337398 |
| V | 18391000 | 18421000 | 30000   | 0.00955285 |
| V | 18430000 | 19779000 | 1349000 | 0.13560858 |
| V | 19808000 | 19824000 | 16000   | 0.02839177 |
| V | 19834000 | 19874000 | 40000   | 0.09032012 |
| V | 19886000 | 19952000 | 66000   | 0.09774575 |
| V | 19960000 | 19999000 | 39000   | 0.05534709 |
| V | 20060000 | 20087000 | 27000   | 0.32588076 |
| V | 20099000 | 20665000 | 566000  | 0.1189186  |
| X | 1000     | 109000   | 108000  | 0.12347561 |

|   |          |          |        |            |
|---|----------|----------|--------|------------|
| X | 115000   | 292000   | 177000 | 0.10438198 |
| X | 1460000  | 1516000  | 56000  | 0.0341899  |
| X | 1534000  | 1547000  | 13000  | 0.03822702 |
| X | 1558000  | 1596000  | 38000  | 0.00401155 |
| X | 1645000  | 1695000  | 50000  | 0.01384146 |
| X | 1711000  | 1733000  | 22000  | 0.03464523 |
| X | 1755000  | 1776000  | 21000  | 0.15926249 |
| X | 1800000  | 1840000  | 40000  | 0.0242378  |
| X | 2030000  | 2039000  | 9000   | 0.00304878 |
| X | 2744000  | 2753000  | 9000   | 0.00304878 |
| X | 4342000  | 4356000  | 14000  | 0.02743902 |
| X | 5046000  | 5056000  | 10000  | 0.07743902 |
| X | 5114000  | 5123000  | 9000   | 0.00609756 |
| X | 5309000  | 5318000  | 9000   | 0.00304878 |
| X | 6112000  | 6128000  | 16000  | 0.00381098 |
| X | 6905000  | 6917000  | 12000  | 0.06097561 |
| X | 7345000  | 7365000  | 20000  | 0.35015244 |
| X | 7896000  | 7908000  | 12000  | 0.0152439  |
| X | 7914000  | 7930000  | 16000  | 0.05182927 |
| X | 8101000  | 8110000  | 9000   | 0.03353659 |
| X | 11768000 | 11784000 | 16000  | 0.00304878 |
| X | 11798000 | 11807000 | 9000   | 0.01930894 |
| X | 12201000 | 12224000 | 23000  | 0.02889714 |
| X | 12602000 | 12611000 | 9000   | 0.01422764 |
| X | 12992000 | 13001000 | 9000   | 0.03353659 |
| X | 13451000 | 13466000 | 15000  | 0.02134146 |
| X | 14174000 | 14183000 | 9000   | 0.00304878 |
| X | 14215000 | 14227000 | 12000  | 0.55919715 |
| X | 14355000 | 14370000 | 15000  | 0.03882114 |
| X | 14371000 | 14396000 | 25000  | 0.09792683 |
| X | 14635000 | 14644000 | 9000   | 0.03658537 |
| X | 15533000 | 15543000 | 10000  | 0.0054878  |
| X | 15617000 | 15637000 | 20000  | 0.01082317 |
| X | 15812000 | 15836000 | 24000  | 0.01892785 |
| X | 17260000 | 17269000 | 9000   | 0.00609756 |
| X | 17287000 | 17302000 | 15000  | 0.00914634 |
| X | 17703000 | 17718000 | 15000  | 0.03597561 |

**Supplementary Table 6 | Summary of statistics of hyper-divergent regions**

Mean variant density (per kb), mean coverage (%), and size (Mb) of genomic regions relative to the N2 reference genome (entire chromosome, arm, center, and tip), hyper-divergent regions (HD), and non-divergent regions (ND) are summarized.

| Chr | Statistics                    | All    | All_HD | All_ND | Arm    | Arm_HD | Arm_ND | Center | Center_HD | Center_ND | Tip    | Tip_HD | Tip_ND |
|-----|-------------------------------|--------|--------|--------|--------|--------|--------|--------|-----------|-----------|--------|--------|--------|
| I   | Mean variant density (per kb) | 1.08   | 15.97  | 1.03   | 1.81   | 16.93  | 1.7    | 0.33   | 3.59      | 0.33      | 1.41   | NA     | 1.41   |
|     | Mean coverage (%)             | 99.93  | 43.84  | 100.12 | 80.52  | 44.56  | 80.91  | 109.22 | 34.44     | 109.22    | 199.8  | NA     | 199.8  |
|     | Size (Mb)                     | 15.07  | 1.61   | 15.07  | 7.17   | 1.49   | 7.17   | 7.18   | 0.12      | 7.18      | 0.72   | NA     | 0.72   |
| II  | Mean variant density (per kb) | 2.32   | 18.49  | 1.82   | 3.71   | 18.11  | 2.65   | 1.07   | 24.51     | 1.06      | 1.3    | 20.92  | 1.25   |
|     | Mean coverage (%)             | 97.82  | 52.22  | 99.69  | 83.71  | 49.36  | 87.68  | 112.73 | 98.36     | 112.73    | 92.34  | 67.71  | 92.36  |
|     | Size (Mb)                     | 15.28  | 3.58   | 15.28  | 7.16   | 3.34   | 7.16   | 7.14   | 0.19      | 7.14      | 0.98   | 0.05   | 0.98   |
| III | Mean variant density (per kb) | 1.76   | 14.97  | 1.53   | 2.84   | 12.99  | 2.47   | 0.8    | 28.48     | 0.78      | 1.57   | 22.2   | 0.8    |
|     | Mean coverage (%)             | 94.48  | 41.61  | 95.16  | 76.47  | 39.3   | 77.75  | 111.34 | 74.35     | 111.36    | 92.94  | 46.88  | 94.29  |
|     | Size (Mb)                     | 13.78  | 2.16   | 13.78  | 6.11   | 1.74   | 6.11   | 6.62   | 0.06      | 6.62      | 1.06   | 0.36   | 1.06   |
| IV  | Mean variant density (per kb) | 1.27   | 17.97  | 1.13   | 2.07   | 13.58  | 1.97   | 0.55   | 26.05     | 0.49      | 1.91   | 20.09  | 1.21   |
|     | Mean coverage (%)             | 97.63  | 54.83  | 97.88  | 84.04  | 44.06  | 84.41  | 108.19 | 73.54     | 108.29    | 96.43  | 61.6   | 97.08  |
|     | Size (Mb)                     | 17.49  | 2.18   | 17.49  | 6.92   | 1.22   | 6.92   | 9.07   | 0.56      | 9.07      | 1.5    | 0.4    | 1.5    |
| V   | Mean variant density (per kb) | 1.97   | 26.47  | 1.12   | 2.8    | 22.41  | 1.75   | 1.15   | 33.83     | 0.6       | 3.05   | 33.56  | 1.04   |
|     | Mean coverage (%)             | 99.68  | 57.42  | 101.82 | 85.24  | 47.17  | 89.22  | 112    | 79.5      | 112.59    | 99.07  | 65.8   | 101.19 |
|     | Size (Mb)                     | 20.92  | 10.04  | 20.92  | 9.04   | 6.45   | 9.04   | 10.65  | 2.63      | 10.65     | 1.23   | 0.96   | 1.23   |
| X   | Mean variant density (per kb) | 1.23   | 8.95   | 1.21   | 1.26   | 12.17  | 1.24   | 1.28   | 15.81     | 1.27      | 0.87   | 1.78   | 0.87   |
|     | Mean coverage (%)             | 108.95 | 43.55  | 109.01 | 105.61 | 55.17  | 105.68 | 114.83 | 79.16     | 114.83    | 105.99 | 13.8   | 106.18 |
|     | Size (Mb)                     | 17.72  | 0.92   | 17.72  | 9.5    | 0.47   | 9.5    | 6.34   | 0.12      | 6.34      | 1.87   | 0.32   | 1.87   |
